# Supplementary material
Source: PubMed Central journal article supplement (PMC6857815)

# Supplementary Table 1

## Sample size and statistics

### Figure 1b

#### Sample size

| Genotype                                 | Gender | Feeding status | Incubated Temperature (°C) | Sample size (N) (# of trials) | # of flies in each trial (n)* |
|------------------------------------------|--------|----------------|----------------------------|-------------------------------|-------------------------------|
| w-; +/+; UAS-Kir2.1,tub-Gal80ts/+        | M      | Fed            | 22                         | 5                             | 33                            |
| w-; +/+; UAS-Kir2.1,tub-Gal80ts/+        | M      | Fed            | 30                         | 4                             | 30                            |
| w-; +/+; CN-Gal4/+                       | M      | Fed            | 22                         | 6                             | 34                            |
| w-; +/+; CN-Gal4/+                       | M      | Fed            | 30                         | 6                             | 32                            |
| w-; +/+; CN-Gal4/ UAS-Kir2.1,tub-Gal80ts | M      | Fed            | 22                         | 4                             | 31                            |
| w-; +/+; CN-Gal4/ UAS-Kir2.1,tub-Gal80ts | M      | Fed            | 30                         | 6                             | 35                            |
| w-; +/+; UAS-Kir2.1,tub-Gal80ts/+        | M      | Starved        | 22                         | 5                             | 35                            |
| w-; +/+; UAS-Kir2.1,tub-Gal80ts/+        | M      | Starved        | 30                         | 5                             | 46                            |
| w-; +/+; CN-Gal4/+                       | M      | Starved        | 22                         | 5                             | 35                            |
| w-; +/+; CN-Gal4/+                       | M      | Starved        | 30                         | 6                             | 34                            |
| w-; +/+; CN-Gal4/ UAS-Kir2.1,tub-Gal80ts | M      | Starved        | 22                         | 6                             | 30                            |
| w-; +/+; CN-Gal4/ UAS-Kir2.1,tub-Gal80ts | M      | Starved        | 30                         | 6                             | 30                            |

\* The number of files(n) stated in this table is the number of flies that was used in one of the all trials. For all the details, please check the raw data.

#### Statistics - One-way ANOVA with Tukey post hoc test

##### Group 1 (Fed, 22 °C, CN-Gal4 X UAS-Kir2.1,tub-Gal80ts)

| Tukey's multiple comparisons test                           | Mean Diff. | 95.00% CI of diff. | Significant? | Summary | Adjusted P Value |
|-------------------------------------------------------------|------------|--------------------|--------------|---------|------------------|
| UAS-Kir2.1,tub-Gal80ts/+ vs. CN-Gal4/+                      | -2.684     | -27.74 to 22.38    | No           | ns      | 0.9562           |
| UAS-Kir2.1,tub-Gal80ts/+ vs. UAS-Kir2.1,tub-Gal80ts/CN-Gal4 | -6.975     | -34.74 to 20.79    | No           | ns      | 0.7847           |
| CN-Gal4/+ vs. UAS-Kir2.1,tub-Gal80ts/CN-Gal4                | -4.291     | -31.00 to 22.42    | No           | ns      | 0.9045           |

##### Group 2 (Fed, 30 °C, CN-Gal4 X UAS-Kir2.1,tub-Gal80ts)

| Tukey's multiple comparisons test                           | Mean Diff. | 95.00% CI of diff. | Significant? | Summary | Adjusted P Value |
|-------------------------------------------------------------|------------|--------------------|--------------|---------|------------------|
| UAS-Kir2.1,tub-Gal80ts/+ vs. CN-Gal4/+                      | -13.53     | -29.36 to 2.305    | No           | ns      | 0.0986           |
| UAS-Kir2.1,tub-Gal80ts/+ vs. UAS-Kir2.1,tub-Gal80ts/CN-Gal4 | -10.61     | -26.44 to 5.220    | No           | ns      | 0.2179           |
| CN-Gal4/+ vs. UAS-Kir2.1,tub-Gal80ts/CN-Gal4                | 2.915      | -11.25 to 17.08    | No           | ns      | 0.8515           |

##### Group 3 (Starved, 22 °C, CN-Gal4 X UAS-Kir2.1,tub-Gal80ts)

| Tukey's multiple comparisons test                           | Mean Diff. | 95.00% CI of diff. | Significant? | Summary | Adjusted P Value |
|-------------------------------------------------------------|------------|--------------------|--------------|---------|------------------|
| UAS-Kir2.1,tub-Gal80ts/+ vs. CN-Gal4/+                      | -7.155     | -35.94 to 21.63    | No           | ns      | 0.7887           |
| UAS-Kir2.1,tub-Gal80ts/+ vs. UAS-Kir2.1,tub-Gal80ts/CN-Gal4 | 3.006      | -25.78 to 31.80    | No           | ns      | 0.9583           |
| CN-Gal4/+ vs. UAS-Kir2.1,tub-Gal80ts/CN-Gal4                | 10.16      | -18.63 to 38.95    | No           | ns      | 0.6256           |

**Group 4 (Starved, 30 °C, CN-Gal4 X UAS-Kir2.1,tub-Gal80ts)**

| Tukey's multiple comparisons test                                  | Mean Diff. | 95.00% CI of diff. | Significant? | Summary | Adjusted P Value |
|--------------------------------------------------------------------|------------|--------------------|--------------|---------|------------------|
| <i>UAS-Kir2.1,tub-Gal80ts/+ vs. CN-Gal4/+</i>                      | -19.00     | -41.00 to 3.004    | No           | ns      | 0.0954           |
| <i>UAS-Kir2.1,tub-Gal80ts/+ vs. UAS-Kir2.1,tub-Gal80ts/CN-Gal4</i> | 85.92      | 63.92 to 107.9     | Yes          | ***     | <0.0001          |
| <i>CN-Gal4/+ vs. UAS-Kir2.1,tub-Gal80ts/CN-Gal4</i>                | 104.9      | 83.94 to 125.9     | Yes          | ***     | <0.0001          |

**Figure 1e**

**Sample size**

| Genotype                                                          | Gender | Feeding status | Incubated Temperature (°C) | Sample size (N) (# of trials) | # of flies in each trial (n)* |
|-------------------------------------------------------------------|--------|----------------|----------------------------|-------------------------------|-------------------------------|
| <i>w-; R20F11-LexA/+; CN-Gal4/+</i>                               | M      | Fed            | 23                         | 5                             | 37                            |
| <i>w-; UAS-FRT-stop-FRT-TNT/+; LexAop-FLP/+</i>                   | M      | Fed            | 23                         | 5                             | 30                            |
| <i>w-; R20F11-LexA/ UAS-FRT-stop-FRT-TNT; CN-Gal4/ LexAop-FLP</i> | M      | Fed            | 23                         | 5                             | 34                            |
| <i>w-; R20F11-LexA/+; CN-Gal4/+</i>                               | M      | Starved        | 23                         | 5                             | 43                            |
| <i>w-; UAS-FRT-stop-FRT-TNT/+; LexAop-FLP/+</i>                   | M      | Starved        | 23                         | 6                             | 44                            |
| <i>w-; R20F11-LexA/ UAS-FRT-stop-FRT-TNT; CN-Gal4/ LexAop-FLP</i> | M      | Starved        | 23                         | 6                             | 31                            |

\* The number of files(n) stated in this table is the number of flies that was used in one of the all trials. For all the details, please check the raw data.

**Statistics - One-way ANOVA with Tukey post hoc test**

**Group 1 (Fed, R20F11-LexA, CN-Gal4 X LexAop-FLP, UAS-FRT-stop-FRT-TNT)**

| Tukey's multiple comparisons test                      | Mean Diff. | 95.00% CI of diff. | Significant? | Summary | Adjusted P Value |
|--------------------------------------------------------|------------|--------------------|--------------|---------|------------------|
| <i>R20F11,CN vs. FLP,UAS-stop-TNT</i>                  | 2.414      | -7.574 to 12.40    | No           | ns      | 0.7987           |
| <i>R20F11,CN vs. R20F11,CN/FLP,UAS-stop-TNT</i>        | 4.804      | -5.184 to 14.79    | No           | ns      | 0.4306           |
| <i>FLP,UAS-stop-TNT vs. R20F11,CN/FLP,UAS-stop-TNT</i> | 2.390      | -7.598 to 12.38    | No           | ns      | 0.8023           |

**Group 2 (Starved, R20F11-LexA, CN-Gal4 X LexAop-FLP, UAS-FRT-stop-FRT-TNT)**

| Tukey's multiple comparisons test                      | Mean Diff. | 95.00% CI of diff. | Significant? | Summary | Adjusted P Value |
|--------------------------------------------------------|------------|--------------------|--------------|---------|------------------|
| <i>R20F11,CN vs. FLP,UAS-stop-TNT</i>                  | -12.77     | -36.95 to 11.41    | No           | ns      | 0.3719           |
| <i>R20F11,CN vs. R20F11,CN/FLP,UAS-stop-TNT</i>        | 73.35      | 48.09 to 98.60     | Yes          | ***     | <0.0001          |
| <i>FLP,UAS-stop-TNT vs. R20F11,CN/FLP,UAS-stop-TNT</i> | 86.12      | 61.94 to 110.3     | Yes          | ***     | <0.0001          |

## Figure 2c

### Sample size

| Genotype                                       | Gender | Feeding status | Treatment                 | Sample size (N)<br>(# of brains) | Sample size (n)<br>(# of cells) |
|------------------------------------------------|--------|----------------|---------------------------|----------------------------------|---------------------------------|
| <i>w<sup>-</sup>; UAS-GCaMP6s/+; CN-Gal4/+</i> | M      | Fed            | 1 mM D-glucose            | 7                                | 7                               |
| <i>w<sup>-</sup>; UAS-GCaMP6s/+; CN-Gal4/+</i> | M      | Fed            | 20 mM D-glucose           | 8                                | 8                               |
| <i>w<sup>-</sup>; UAS-GCaMP6s/+; CN-Gal4/+</i> | M      | Fed            | 20 mM D-fructose          | 6                                | 6                               |
| <i>w<sup>-</sup>; UAS-GCaMP6s/+; CN-Gal4/+</i> | M      | Fed            | 20 mM D-trehalose         | 7                                | 7                               |
| <i>w<sup>-</sup>; UAS-GCaMP6s/+; CN-Gal4/+</i> | M      | Fed            | 100 $\mu$ M Glibenclamide | 6                                | 6                               |

### Statistics - One-way ANOVA with Tukey post hoc test

#### Peak amplitude

| Tukey's multiple comparisons test         | Mean Diff. | 95.00% CI of diff. | Significant? | Summary | Adjusted P Value |
|-------------------------------------------|------------|--------------------|--------------|---------|------------------|
| 1mM D-glucose vs. 20mM D-glucose          | -106.0     | -324.1 to 112.1    | No           | ns      | 0.6245           |
| 1mM D-glucose vs. 20mM D-fructose         | -51.70     | -286.1 to 182.7    | No           | ns      | 0.9669           |
| 1mM D-glucose vs. 20mM D-trehalose        | -17.22     | -242.4 to 208.0    | No           | ns      | 0.9994           |
| 1mM D-glucose vs. 100M D-Glibenclamide    | -69.33     | -303.7 to 165.1    | No           | ns      | 0.9091           |
| 20mM D-glucose vs. 20mM D-fructose        | 54.30      | -173.2 to 281.8    | No           | ns      | 0.9562           |
| 20mM D-glucose vs. 20mM D-trehalose       | 88.78      | -129.3 to 306.8    | No           | ns      | 0.7605           |
| 20mM D-glucose vs. 100M D-Glibenclamide   | 36.67      | -190.9 to 264.2    | No           | ns      | 0.9896           |
| 20mM D-fructose vs. 20mM D-trehalose      | 34.48      | -199.9 to 268.9    | No           | ns      | 0.9926           |
| 20mM D-fructose vs. 100M D-Glibenclamide  | -17.64     | -260.9 to 225.6    | No           | ns      | 0.9995           |
| 20mM D-trehalose vs. 100M D-Glibenclamide | -52.11     | -286.5 to 182.3    | No           | ns      | 0.9660           |

#### Oscillation number

| Tukey's multiple comparisons test                | Mean Diff. | 95.00% CI of diff. | Significant? | Summary | Adjusted P Value |
|--------------------------------------------------|------------|--------------------|--------------|---------|------------------|
| 1mM D-glucose vs. 20mM D-glucose                 | 2.661      | -6.740 to 12.06    | No           | ns      | 0.9214           |
| 1mM D-glucose vs. 20mM D-fructose                | 2.119      | -7.986 to 12.22    | No           | ns      | 0.9724           |
| 1mM D-glucose vs. 20mM D-trehalose               | 5.429      | -4.280 to 15.14    | No           | ns      | 0.4940           |
| 1mM D-glucose vs. 100 $\mu$ M D-Glibenclamide    | 6.952      | -3.153 to 17.06    | No           | ns      | 0.2913           |
| 20mM D-glucose vs. 20mM D-fructose               | -0.5417    | -10.35 to 9.268    | No           | ns      | 0.9998           |
| 20mM D-glucose vs. 20mM D-trehalose              | 2.768      | -6.633 to 12.17    | No           | ns      | 0.9105           |
| 20mM D-glucose vs. 100 $\mu$ M D-Glibenclamide   | 4.292      | -5.518 to 14.10    | No           | ns      | 0.7100           |
| 20mM D-fructose vs. 20mM D-trehalose             | 3.310      | -6.796 to 13.41    | No           | ns      | 0.8739           |
| 20mM D-fructose vs. 100 $\mu$ M D-Glibenclamide  | 4.833      | -5.653 to 15.32    | No           | ns      | 0.6694           |
| 20mM D-trehalose vs. 100 $\mu$ M D-Glibenclamide | 1.524      | -8.582 to 11.63    | No           | ns      | 0.9919           |

## Duration

| Tukey's multiple comparisons test          | Mean Diff. | 95.00% CI of diff. | Significant? | Summary | Adjusted P Value |
|--------------------------------------------|------------|--------------------|--------------|---------|------------------|
| 1mM D-glucose vs. 20mM D-glucose           | -160.4     | -824.8 to 503.9    | No           | ns      | 0.9544           |
| 1mM D-glucose vs. 20mM D-fructose          | 94.76      | -619.4 to 808.9    | No           | ns      | 0.9950           |
| 1mM D-glucose vs. 20mM D-trehalose         | 432.9      | -253.3 to 1119     | No           | ns      | 0.3745           |
| 1mM D-glucose vs. 100µM D-Glibenclamide    | 0.5952     | -713.6 to 714.8    | No           | ns      | >0.9999          |
| 20mM D-glucose vs. 20mM D-fructose         | 255.2      | -438.1 to 948.5    | No           | ns      | 0.8201           |
| 20mM D-glucose vs. 20mM D-trehalose        | 593.3      | -71.06 to 1258     | No           | ns      | 0.0975           |
| 20mM D-glucose vs. 100µM D-Glibenclamide   | 161.0      | -532.2 to 854.3    | No           | ns      | 0.9602           |
| 20mM D-fructose vs. 20mM D-trehalose       | 338.1      | -376.1 to 1052     | No           | ns      | 0.6472           |
| 20mM D-fructose vs. 100µM D-Glibenclamide  | -94.17     | -835.3 to 647.0    | No           | ns      | 0.9958           |
| 20mM D-trehalose vs. 100µM D-Glibenclamide | -432.3     | -1146 to 281.9     | No           | ns      | 0.4155           |

## Figure 2d

### Sample size

| Genotype                            | Gender | Feeding status | Treatment                                    | Sample size (N) (# of brains) | Sample size (n) (# of cells) |
|-------------------------------------|--------|----------------|----------------------------------------------|-------------------------------|------------------------------|
| <i>w-; UAS-GCaMP6s/+; CN-Gal4/+</i> | M      | Fed            | 20 mM D-glucose                              | 8                             | 8                            |
| <i>w-; UAS-GCaMP6s/+; CN-Gal4/+</i> | M      | Fed            | 20 mM L-glucose                              | 6                             | 6                            |
| <i>w-; UAS-GCaMP6s/+; CN-Gal4/+</i> | M      | Fed            | 20 mM D-glucose +<br>20 mM 2-D-deoxy-glucose | 9                             | 9                            |
| <i>w-; UAS-GCaMP6s/+; CN-Gal4/+</i> | M      | Fed            | 20 mM D-glucose +<br>1 mM phlorizin          | 4                             | 4                            |
| <i>w-; UAS-GCaMP6s/+; CN-Gal4/+</i> | M      | Fed            | 20 mM D-glucose +<br>5 µM nimodipine         | 4                             | 4                            |



## Statistics - One-way ANOVA with Tukey post hoc test

### Peak amplitude

| Tukey's multiple comparisons test          | Mean Diff. | 95.00% CI of diff. | Significant? | Summary | Adjusted P Value |
|--------------------------------------------|------------|--------------------|--------------|---------|------------------|
| 20mM D-glucose vs. 20mM L-glucose          | 521.8      | 410.8 to 632.9     | Yes          | ***     | <0.0001          |
| 20mM D-glucose vs. 20mM D-glucose+D2G      | 543.8      | 443.9 to 643.7     | Yes          | ***     | <0.0001          |
| 20mM D-glucose vs. 20mM D-glucose+phl      | 517.8      | 391.9 to 643.6     | Yes          | ***     | <0.0001          |
| 20mM D-glucose vs. 20mM D-glucose+Nimo     | 506.8      | 380.9 to 632.6     | Yes          | ***     | <0.0001          |
| 20mM L-glucose vs. 20mM D-glucose+D2G      | 21.97      | -86.38 to 130.3    | No           | ns      | 0.9748           |
| 20mM L-glucose vs. 20mM D-glucose+phl      | -4.083     | -136.8 to 128.6    | No           | ns      | >0.9999          |
| 20mM L-glucose vs. 20mM D-glucose+Nimo     | -15.08     | -147.8 to 117.6    | No           | ns      | 0.9972           |
| 20mM D-glucose+D2G vs. 20mM D-glucose+phl  | -26.05     | -149.6 to 97.49    | No           | ns      | 0.9710           |
| 20mM D-glucose+D2G vs. 20mM D-glucose+Nimo | -37.04     | -160.6 to 86.49    | No           | ns      | 0.9023           |
| 20mM D-glucose+phl vs. 20mM D-glucose+Nimo | -10.99     | -156.4 to 134.4    | No           | ns      | 0.9994           |

### Oscillation number

| Tukey's multiple comparisons test          | Mean Diff. | 95.00% CI of diff. | Significant? | Summary | Adjusted P Value |
|--------------------------------------------|------------|--------------------|--------------|---------|------------------|
| 20mM D-glucose vs. 20mM L-glucose          | 7.292      | 0.8083 to 13.78    | Yes          | *       | 0.0219           |
| 20mM D-glucose vs. 20mM D-glucose+D2G      | 8.069      | 2.236 to 13.90     | Yes          | **      | 0.0034           |
| 20mM D-glucose vs. 20mM D-glucose+phl      | 7.875      | 0.5235 to 15.23    | Yes          | *       | 0.0314           |
| 20mM D-glucose vs. 20mM D-glucose+Nimo     | 7.375      | 0.02355 to 14.73   | Yes          | *       | 0.0490           |
| 20mM L-glucose vs. 20mM D-glucose+D2G      | 0.7778     | -5.549 to 7.105    | No           | ns      | 0.9962           |
| 20mM L-glucose vs. 20mM D-glucose+phl      | 0.5833     | -7.166 to 8.332    | No           | ns      | 0.9994           |
| 20mM L-glucose vs. 20mM D-glucose+Nimo     | 0.08333    | -7.666 to 7.832    | No           | ns      | >0.9999          |
| 20mM D-glucose+D2G vs. 20mM D-glucose+phl  | -0.1944    | -7.408 to 7.020    | No           | ns      | >0.9999          |
| 20mM D-glucose+D2G vs. 20mM D-glucose+Nimo | -0.6944    | -7.908 to 6.520    | No           | ns      | 0.9985           |
| 20mM D-glucose+phl vs. 20mM D-glucose+Nimo | -0.5000    | -8.989 to 7.989    | No           | ns      | 0.9998           |

### Duration

| Tukey's multiple comparisons test          | Mean Diff. | 95.00% CI of diff. | Significant? | Summary | Adjusted P Value |
|--------------------------------------------|------------|--------------------|--------------|---------|------------------|
| 20mM D-glucose vs. 20mM L-glucose          | 1111       | 467.3 to 1755      | Yes          | ***     | 0.0003           |
| 20mM D-glucose vs. 20mM D-glucose+2DG      | 1289       | 709.3 to 1868      | Yes          | ***     | <0.0001          |
| 20mM D-glucose vs. 20mM D-glucose+phl      | 1267       | 536.9 to 1997      | Yes          | ***     | 0.0002           |
| 20mM D-glucose vs. 20mM D-glucose+Nimo     | 1319       | 589.4 to 2049      | Yes          | ***     | 0.0001           |
| 20mM L-glucose vs. 20mM D-glucose+2DG      | 177.5      | -450.7 to 805.7    | No           | ns      | 0.9197           |
| 20mM L-glucose vs. 20mM D-glucose+phl      | 155.8      | -613.6 to 925.3    | No           | ns      | 0.9749           |
| 20mM L-glucose vs. 20mM D-glucose+Nimo     | 208.3      | -561.1 to 977.8    | No           | ns      | 0.9304           |
| 20mM D-glucose+2DG vs. 20mM D-glucose+phl  | -21.67     | -738.0 to 694.6    | No           | ns      | >0.9999          |
| 20mM D-glucose+2DG vs. 20mM D-glucose+Nimo | 30.83      | -685.5 to 747.1    | No           | ns      | >0.9999          |
| 20mM D-glucose+phl vs. 20mM D-glucose+Nimo | 52.50      | -790.4 to 895.4    | No           | ns      | 0.9997           |

## Figure 2f

### Sample size

| Genotype                                                                                          | Gender | Feeding status | Incubated Temperature (°C) | Sample size (N) (# of brains) | Sample size (n) (# of cells) |
|---------------------------------------------------------------------------------------------------|--------|----------------|----------------------------|-------------------------------|------------------------------|
| <i>w<sup>-</sup>; LexAop-CD8-GFP-2A-CD8-GFP/+; UAS-mLexA-VP16-NFAT, LexAop-rCD2-GFP/ Crz-Gal4</i> | M      | Fed            | 23                         | 6                             | 9                            |
| <i>w<sup>-</sup>; LexAop-CD8-GFP-2A-CD8-GFP/+; UAS-mLexA-VP16-NFAT, LexAop-rCD2-GFP/ Crz-Gal4</i> | M      | Starved        | 23                         | 7                             | 9                            |
| <i>w<sup>-</sup>; LexAop-CD8-GFP-2A-CD8-GFP/+; UAS-mLexA-VP16-NFAT, LexAop-rCD2-GFP/ Crz-Gal4</i> | M      | Refed          | 23                         | 6                             | 10                           |

### Statistics - One-way ANOVA with Tukey post hoc test

#### Relative GFP intensity - Cell body: Fed vs. Starved vs. Refed

| Tukey's multiple comparisons test | Mean Diff. | 95.00% CI of diff. | Significant? | Summary | Adjusted P Value |
|-----------------------------------|------------|--------------------|--------------|---------|------------------|
| Fed vs. Starved                   | 0.5386     | 0.05890 to 1.018   | Yes          | *       | 0.0256           |
| Fed vs. Refed                     | -0.1220    | -0.5896 to 0.3455  | No           | ns      | 0.7940           |
| Starved vs. Refed                 | -0.6607    | -1.128 to -0.1931  | Yes          | **      | 0.0046           |

## Figure 2g

### Sample size

| Genotype                                                                                         | Gender | Feeding status | Incubated Temperature (°C) | Sample size (N) (# of brains) | Sample size (n) (# of cells) |
|--------------------------------------------------------------------------------------------------|--------|----------------|----------------------------|-------------------------------|------------------------------|
| <i>w<sup>-</sup>; LexAop-CD8-GFP-2A-CD8-GFP/+; UAS-mLexA-VP16-NFAT, LexAop-rCD2-GFP/ CN-Gal4</i> | M      | Fed            | 23                         | 6                             | 10                           |
| <i>w<sup>-</sup>; LexAop-CD8-GFP-2A-CD8-GFP/+; UAS-mLexA-VP16-NFAT, LexAop-rCD2-GFP/ CN-Gal4</i> | M      | Starved        | 23                         | 7                             | 9                            |
| <i>w<sup>-</sup>; LexAop-CD8-GFP-2A-CD8-GFP/+; UAS-mLexA-VP16-NFAT, LexAop-rCD2-GFP/ CN-Gal4</i> | M      | Refed          | 23                         | 6                             | 11                           |

### Statistics - One-way ANOVA with Tukey post hoc test

#### Relative GFP intensity - Neurites to IPCs: Fed vs. Starved vs. Refed

| Tukey's multiple comparisons test | Mean Diff. | 95.00% CI of diff. | Significant? | Summary | Adjusted P Value |
|-----------------------------------|------------|--------------------|--------------|---------|------------------|
| Fed vs. Starved                   | 0.6110     | -0.02839 to 1.250  | No           | ns      | 0.0632           |
| Fed vs. Refed                     | 0.03432    | -0.5737 to 0.6424  | No           | ns      | 0.9893           |
| Starved vs. Refed                 | -0.5767    | -1.202 to 0.04879  | No           | ns      | 0.0750           |

### Figure 3b

#### Sample size

| Genotype                                        | Gender | Feeding status | Incubated Temperature (°C) | Sample size (N) (# of brains) | Sample size (n) (# of cells) |
|-------------------------------------------------|--------|----------------|----------------------------|-------------------------------|------------------------------|
| <i>w<sup>-</sup>; Crz-Gal4/+; UAS-Syt-GFP/+</i> | M      | Fed            | 23                         | 10                            | 10                           |
| <i>w<sup>-</sup>; Crz-Gal4/+; UAS-Syt-GFP/+</i> | M      | Starved        | 23                         | 7                             | 7                            |
| <i>w<sup>-</sup>; Crz-Gal4/+; UAS-Syt-GFP/+</i> | M      | Refed          | 23                         | 11                            | 11                           |

#### Statistics - One-way ANOVA with Tukey post hoc test

##### Number of Syt<sup>+</sup> puncta - Neurites to IPCs: Fed vs. Starved vs. Refed

| Tukey's multiple comparisons test | Mean Diff. | 95.00% CI of diff. | Significant? | Summary | Adjusted P Value |
|-----------------------------------|------------|--------------------|--------------|---------|------------------|
| Fed vs. Starved                   | 29.80      | 19.33 to 40.27     | Yes          | ***     | <0.0001          |
| Fed vs. Refed                     | 5.891      | -3.391 to 15.17    | No           | ns      | 0.2723           |
| Starved vs. Refed                 | -23.91     | -34.18 to -13.64   | Yes          | ***     | <0.0001          |

### Figure 3d

#### Sample size

| Experiments            | Genotype                                                                       | Gender | Feeding status | Treatment  | Sample size (N) (# of brains) | Sample size (n) (# of cells) |
|------------------------|--------------------------------------------------------------------------------|--------|----------------|------------|-------------------------------|------------------------------|
| Control -Fed           | <i>w<sup>-</sup>; dilp2-LexA/ LexAop-GCaMP6s; UAS-P2X<sub>2</sub>/+</i>        | M      | Fed            | 2.5 mM ATP | 8                             | 50                           |
| Experimental - Fed     | <i>w<sup>-</sup>; dilp2-LexA/ LexAop-GCaMP6s; CN-Gal4/ UAS-P2X<sub>2</sub></i> | M      | Fed            | 2.5 mM ATP | 10                            | 63                           |
| Experimental - Starved | <i>w<sup>-</sup>; dilp2-LexA/ LexAop-GCaMP6s; CN-Gal4/ UAS-P2X<sub>2</sub></i> | M      | Starved        | 2.5 mM ATP | 8                             | 47                           |

#### Statistics - One-way ANOVA with Tukey post hoc test

##### Max ΔF/F (%): Control-Fed vs. Experimental-Fed vs. Experimental-Starved

| Tukey's multiple comparisons test | Mean Diff. | 95.00% CI of diff. | Significant? | Summary | Adjusted P Value |
|-----------------------------------|------------|--------------------|--------------|---------|------------------|
| Control vs. Fed                   | -259.5     | -330.6 to -188.4   | Yes          | ***     | <0.0001          |
| Control vs. Starved               | -71.59     | -147.9 to 4.668    | No           | ns      | 0.0707           |
| Fed vs. Starved                   | 187.9      | 115.5 to 260.2     | Yes          | ***     | <0.0001          |

## Figure 3e

### Sample size

| Genotype                                       | Gender | Feeding status | Incubated Temperature (°C) | Sample size (N) (# of brains) | Sample size (n) (# of cells) |
|------------------------------------------------|--------|----------------|----------------------------|-------------------------------|------------------------------|
| <i>w<sup>-</sup>; +/+; UAS-Kir2.1/+</i>        | M      | Starved        | 23                         | 11                            | 66                           |
| <i>w<sup>-</sup>; +/+; UAS-Kir2.1/+</i>        | M      | Refed          | 23                         | 7                             | 70                           |
| <i>w<sup>-</sup>; +/+; UAS-Kir2.1/ CN-Gal4</i> | M      | Starved        | 23                         | 8                             | 61                           |
| <i>w<sup>-</sup>; +/+; UAS-Kir2.1/ CN-Gal4</i> | M      | Refed          | 23                         | 6                             | 48                           |

### Statistics - Unpaired two-tailed t test

#### *UAS-Kir2.1/+*: Starved vs. Refed

##### Unpaired t test

|                                     |                    |
|-------------------------------------|--------------------|
| P value                             | <0.0001            |
| P value summary                     | ***                |
| Significantly different (P < 0.05)? | Yes                |
| One- or two-tailed P value?         | Two-tailed         |
| t, df                               | t=12.02, df=134    |
| Mean of column starved              | 1.000              |
| Mean of column refed                | 0.4716             |
| Difference between means ± SEM      | -0.5284 ± 0.04394  |
| 95% confidence interval             | -0.6153 to -0.4414 |
| R squared (eta squared)             | 0.5190             |

#### *UAS-Kir2.1/CN-Gal4*: Starved vs. Refed

##### Unpaired t test

|                                     |                     |
|-------------------------------------|---------------------|
| P value                             | 0.8343              |
| P value summary                     | ns                  |
| Significantly different (P < 0.05)? | No                  |
| One- or two-tailed P value?         | Two-tailed          |
| t, df                               | t=0.2097, df=107    |
| Mean of column starved              | 0.8646              |
| Mean of column refed                | 0.8556              |
| Difference between means ± SEM      | -0.009011 ± 0.04296 |
| 95% confidence interval             | -0.09418 to 0.07616 |
| R squared (eta squared)             | 0.0004110           |

## Figure 3f

### Sample size

| Genotype                                      | Gender | Feeding status | Incubated Temperature (°C) | Sample size (N) (# of trials) | # of flies in each trial (n) |
|-----------------------------------------------|--------|----------------|----------------------------|-------------------------------|------------------------------|
| <i>w<sup>-</sup>; +/+; UAS-Kir2.1/+</i>       | M      | Fed            | 23                         | 5                             | 500                          |
| <i>w<sup>-</sup>; +/+; UAS-Kir2.1/CN-Gal4</i> | M      | Fed            | 23                         | 5                             | 500                          |

### Statistics - Unpaired two-tailed t test

#### *UAS-Kir2.1/CN-Gal4* vs. *UAS-Kir2.1/+*

| Unpaired t test                        |                   |
|----------------------------------------|-------------------|
| P value                                | 0.0012            |
| P value summary                        | **                |
| Significantly different (P < 0.05)?    | Yes               |
| One- or two-tailed P value?            | Two-tailed        |
| t, df                                  | t=4.917, df=8     |
| Mean of column A                       | 2.679             |
| Mean of column B                       | 1.000             |
| Difference between means (B - A) ± SEM | -1.679 ± 0.3415   |
| 95% confidence interval                | -2.466 to -0.8917 |
| R squared (eta squared)                | 0.7514            |

## Figure 3g

### Sample size

| Experiments  | Genotype                                                                 | Gender | Feeding status | treatment       | Sample size (N) (# of brains) | Sample size (n) (# of cells) |
|--------------|--------------------------------------------------------------------------|--------|----------------|-----------------|-------------------------------|------------------------------|
| Control      | <i>w<sup>-</sup>; R20F11-LexA/ dilp2-Ga4, UAS-GCaMP6s; +/+</i>           | M      | Fed            | 20 mM D-glucose | 8                             | 30                           |
| Experimental | <i>w<sup>-</sup>; R20F11-LexA/ dilp2-Gal4, UAS-GCaMP6s; LexAop-TNT/+</i> | M      | Fed            | 20 mM D-glucose | 12                            | 31                           |

### Statistics - Unpaired two-tailed t test

#### Max $\Delta F/F$ (%): Control vs. Experimental

##### Unpaired t test

|                                            |                    |
|--------------------------------------------|--------------------|
| P value                                    | <0.0001            |
| P value summary                            | ***                |
| Significantly different (P < 0.05)?        | Yes                |
| One- or two-tailed P value?                | Two-tailed         |
| t, df                                      | t=8.582, df=59     |
| Mean of column A                           | 115.1              |
| Mean of column B                           | 24.49              |
| Difference between means (B - A) $\pm$ SEM | -90.62 $\pm$ 10.56 |
| 95% confidence interval                    | -111.7 to -69.49   |
| R squared (eta squared)                    | 0.5552             |

### Figure 4b

#### Sample size

| Genotype                                        | Gender | Feeding status | Incubated Temperature ( $^{\circ}$ C) | Sample size (N) (# of animals) | Sample size (n) (# of cells) |
|-------------------------------------------------|--------|----------------|---------------------------------------|--------------------------------|------------------------------|
| <i>w<sup>-</sup>; Crz-Gal4/+; UAS-Syt-GFP/+</i> | M      | Fed            | 23                                    | 8                              | 8                            |
| <i>w<sup>-</sup>; Crz-Gal4/+; UAS-Syt-GFP/+</i> | M      | Starved        | 23                                    | 7                              | 7                            |
| <i>w<sup>-</sup>; Crz-Gal4/+; UAS-Syt-GFP/+</i> | M      | Refed          | 23                                    | 7                              | 7                            |

### Statistics - One-way ANOVA with Tukey post hoc test

#### Number of Syt<sup>+</sup> puncta - Neurites to CC: Fed vs. Starved vs. Refed

| Tukey's multiple comparisons test | Mean Diff. | 95.00% CI of diff. | Significant? | Summary | Adjusted P Value |
|-----------------------------------|------------|--------------------|--------------|---------|------------------|
| Fed vs. Starved                   | 87.93      | 62.90 to 113.0     | Yes          | ***     | <0.0001          |
| Fed vs. Refed                     | 19.79      | -5.243 to 44.81    | No           | ns      | 0.1374           |
| Starved vs. Refed                 | -68.14     | -93.99 to -42.29   | Yes          | ***     | <0.0001          |

### Figure 4d

#### Sample size

| Experiments        | Genotype                                                                         | Gender | Feeding status | Treatment  | Sample size (N) (# of brains) | Sample size (n) (# of cells) |
|--------------------|----------------------------------------------------------------------------------|--------|----------------|------------|-------------------------------|------------------------------|
| GCaMP-Control      | <i>w<sup>-</sup>; R20F11-LexA/ UAS-GCaMP6s; AKH-Gal4/+</i>                       | M      | Fed            | 2.5 mM ATP | 6                             | 12                           |
| GCaMP-Experimental | <i>w<sup>-</sup>; R20F11-LexA/ UAS-GCaMP6s; AKH-Gal4/ LexAop-P2X<sub>2</sub></i> | M      | Fed            | 2.5 mM ATP | 6                             | 17                           |

### Statistics - Unpaired two-tailed t test

#### Min $\Delta F/F$ (%): GCaMP-control vs. GCaMP Experimental

| Unpaired t test                            |                    |
|--------------------------------------------|--------------------|
| P value                                    | 0.0258             |
| P value summary                            | *                  |
| Significantly different ( $P < 0.05$ )?    | Yes                |
| One- or two-tailed P value?                | Two-tailed         |
| t, df                                      | t=2.359, df=27     |
| Mean of column A                           | -35.59             |
| Mean of column B                           | -51.42             |
| Difference between means (B - A) $\pm$ SEM | -15.83 $\pm$ 6.711 |
| 95% confidence interval                    | -29.60 to -2.060   |
| R squared (eta squared)                    | 0.1709             |

### Figure 4e

#### Sample size

| Experiments            | Genotype                                                               | Gender | Feeding status | Treatment  | Sample size (N) (# of animals) | Sample size (n) (# of CCs) |
|------------------------|------------------------------------------------------------------------|--------|----------------|------------|--------------------------------|----------------------------|
| Arclight-Control-Fed   | <i>w-; UAS-Arclight/+; AKH-Gal4/ LexAop-P2X<sub>2</sub></i>            | M      | Fed            | 2.5 mM ATP | 11                             | 11                         |
| Arclight-Exp - Fed     | <i>w-; R20F11-LexA /UAS-Arclight; AKH-Gal4/ LexAop-P2X<sub>2</sub></i> | M      | Fed            | 2.5 mM ATP | 11                             | 11                         |
| Arclight-Exp - Starved | <i>w-; R20F11-LexA /UAS-Arclight; AKH-Gal4/ LexAop-P2X<sub>2</sub></i> | M      | Starved        | 2.5 mM ATP | 11                             | 11                         |

### Statistics - One-way ANOVA with Tukey post hoc test

#### Max $\Delta F/F$ (%): Arclight-control vs. Arclight Exp-Fed vs. Arclight Exp-Starved

| Tukey's multiple comparisons test | Mean Diff. | 95.00% CI of diff. | Significant? | Summary | Adjusted P Value |
|-----------------------------------|------------|--------------------|--------------|---------|------------------|
| Control vs. Fed                   | -19.72     | -33.30 to -6.129   | Yes          | **      | 0.0033           |
| Control vs. Starved               | -1.826     | -15.41 to 11.76    | No           | ns      | 0.9414           |
| Fed vs. Starved                   | 17.89      | 4.303 to 31.48     | Yes          | **      | 0.0079           |

### Figure 4f

#### Sample size

| Genotype                            | Gender | Feeding status | Incubated Temperature (°C) | Sample size (N) (# of brains) | Sample size (n) (# of cells) |
|-------------------------------------|--------|----------------|----------------------------|-------------------------------|------------------------------|
| <i>w-; +/+; CN-Gal4/+</i>           | M      | Fed            | 23                         | 10                            | 10                           |
| <i>w-; +/+; UAS-Kir2.1/+</i>        | M      | Fed            | 23                         | 13                            | 13                           |
| <i>w-; +/+; UAS-Kir2.1/ CN-Gal4</i> | M      | Fed            | 23                         | 12                            | 12                           |

**Statistics - One-way ANOVA with Tukey post hoc test**

**CN-Gal4/+ vs. UAS-Kir2.1/+ vs. UAS-Kir2.1/CN-Gal4**

| Tukey's multiple comparisons test   | Mean Diff. | 95.00% CI of diff. | Significant? | Summary | Adjusted P Value |
|-------------------------------------|------------|--------------------|--------------|---------|------------------|
| CN-Gal4/+ vs. UAS-Kir2.1/+          | 0.1563     | -0.2332 to 0.5459  | No           | ns      | 0.5908           |
| CN-Gal4/+ vs. UAS-Kir2.1/CN-Gal4    | 0.6334     | 0.2368 to 1.030    | Yes          | **      | 0.0012           |
| UAS-Kir2.1/+ vs. UAS-Kir2.1/CN-Gal4 | 0.4770     | 0.1063 to 0.8478   | Yes          | **      | 0.0093           |

**Figure 4g**

**Sample size**

| Genotype                    | Gender | Feeding status | Incubated Temperature (°C) | Sample size (N) (# of trials) | # of flies in each trial (n) |
|-----------------------------|--------|----------------|----------------------------|-------------------------------|------------------------------|
| w-; +/+; UAS-Kir2.1/+       | M      | Fed            | 23                         | 5                             | 500                          |
| w-; +/+; UAS-Kir2.1/CN-Gal4 | M      | Fed            | 23                         | 5                             | 500                          |

**Statistics - Unpaired two-tailed t test**

**UAS-Kir2.1/ CN-Gal4 vs. UAS-Kir2.1/+**

|                                        |                 |
|----------------------------------------|-----------------|
| Unpaired t test                        |                 |
| P value                                | <0.0001         |
| P value summary                        | ***             |
| Significantly different (P < 0.05)?    | Yes             |
| One- or two-tailed P value?            | Two-tailed      |
| t, df                                  | t=7.488, df=8   |
| Mean of column A                       | 1.000           |
| Mean of column B                       | 2.192           |
| Difference between means (B - A) ± SEM | 1.192 ± 0.1592  |
| 95% confidence interval                | 0.8252 to 1.560 |
| R squared (eta squared)                | 0.8751          |

**Figure 5a**

**Sample size**

| Genotype                            | Gender | Feeding status | Incubated Temperature (°C) | Sample size (N) (# of trials) | # of flies in each trial (n)* |
|-------------------------------------|--------|----------------|----------------------------|-------------------------------|-------------------------------|
| w-; Crz-Gal4/+; +/+                 | M      | Fed            | 23                         | 13                            | 32                            |
| w-; UAS-sNPF-RNAi(2)/+; +/+         | M      | Fed            | 23                         | 7                             | 37                            |
| w-; Crz-Gal4/ UAS-sNPF-RNAi(2); +/+ | M      | Fed            | 23                         | 5                             | 41                            |
| w-; +/+; UAS-sNPF-RNAi(3)/+         | M      | Fed            | 23                         | 4                             | 31                            |
| w-; Crz-Gal4/+; UAS-sNPF-RNAi(3)/+  | M      | Fed            | 23                         | 4                             | 39                            |
| w-; Crz-Gal4/+; +/+                 | M      | Starved        | 23                         | 13                            | 30                            |
| w-; UAS-sNPF-RNAi(2)/+; +/+         | M      | Starved        | 23                         | 8                             | 31                            |
| w-; +/+; UAS-sNPF-RNAi(3)/+         | M      | Starved        | 23                         | 6                             | 39                            |
| w-; Crz-Gal4/ UAS-sNPF-RNAi(2); +/+ | M      | Starved        | 23                         | 5                             | 33                            |
| w-; Crz-Gal4/+; UAS-sNPF-RNAi(3)/+  | M      | Starved        | 23                         | 4                             | 36                            |

\* The number of files(n) stated in this table is the number of flies that was used in one of the all trials. For all the details, please check the raw data.



**Statistics - One-way ANOVA with Tukey post hoc test**

**Group 1 (Fed, *Crz-Gal4 X UAS-sNPF-RNAi(2)*)**

| Tukey's multiple comparisons test               | Mean Diff. | 95.00% CI of diff. | Significant? | Summary | Adjusted P Value |
|-------------------------------------------------|------------|--------------------|--------------|---------|------------------|
| <i>Crz-Gal4/+ vs. sNPF-RNAi(2)/+</i>            | -10.31     | -31.18 to 10.55    | No           | ns      | 0.4422           |
| <i>Crz-Gal4/+ vs. sNPF-RNAi(2)/Crz-Gal4</i>     | 1.714      | -21.71 to 25.14    | No           | ns      | 0.9816           |
| <i>sNPF-RNAi(2)/+ vs. sNPF-RNAi(2)/Crz-Gal4</i> | 12.03      | -14.04 to 38.09    | No           | ns      | 0.4892           |

**Group 2 (Starved, *Crz-Gal4 X UAS-sNPF-RNAi(2)*)**

| Tukey's multiple comparisons test               | Mean Diff. | 95.00% CI of diff. | Significant? | Summary | Adjusted P Value |
|-------------------------------------------------|------------|--------------------|--------------|---------|------------------|
| <i>Crz-Gal4/+ vs. sNPF-RNAi(2)/+</i>            | 5.408      | -11.31 to 22.12    | No           | ns      | 0.7006           |
| <i>Crz-Gal4/+ vs. sNPF-RNAi(2)/Crz-Gal4</i>     | 49.37      | 29.80 to 68.95     | Yes          | ***     | <0.0001          |
| <i>sNPF-RNAi(2)/+ vs. sNPF-RNAi(2)/Crz-Gal4</i> | 43.97      | 22.76 to 65.17     | Yes          | ***     | <0.0001          |

**Group 3 (Fed, *Crz-Gal4 X UAS-sNPF-RNAi(3)*)**

| Tukey's multiple comparisons test               | Mean Diff. | 95.00% CI of diff. | Significant? | Summary | Adjusted P Value |
|-------------------------------------------------|------------|--------------------|--------------|---------|------------------|
| <i>Crz-Gal4/+ vs. sNPF-RNAi(3)/+</i>            | -13.20     | -32.89 to 6.494    | No           | ns      | 0.2285           |
| <i>Crz-Gal4/+ vs. sNPF-RNAi(3)/Crz-Gal4</i>     | -11.79     | -31.49 to 7.898    | No           | ns      | 0.3016           |
| <i>sNPF-RNAi(3)/+ vs. sNPF-RNAi(3)/Crz-Gal4</i> | 1.405      | -22.95 to 25.76    | No           | ns      | 0.9881           |

**Group 4 (Starved, *Crz-Gal4 X UAS-sNPF-RNAi(3)*)**

| Tukey's multiple comparisons test               | Mean Diff. | 95.00% CI of diff. | Significant? | Summary | Adjusted P Value |
|-------------------------------------------------|------------|--------------------|--------------|---------|------------------|
| <i>Crz-Gal4/+ vs. sNPF-RNAi(3)/+</i>            | -3.819     | -25.71 to 18.07    | No           | ns      | 0.8979           |
| <i>Crz-Gal4/+ vs. sNPF-RNAi(3)/Crz-Gal4</i>     | 51.74      | 27.96 to 75.52     | Yes          | ***     | <0.0001          |
| <i>sNPF-RNAi(3)/+ vs. sNPF-RNAi(3)/Crz-Gal4</i> | 55.56      | 27.66 to 83.46     | Yes          | ***     | 0.0002           |

**Figure 5b**

**Sample size**

| Genotype                                        | Gender | Feeding status | Incubated Temperature (°C) | Sample size (N) (# of trials) | # of flies in each trial (n)* |
|-------------------------------------------------|--------|----------------|----------------------------|-------------------------------|-------------------------------|
| <i>w-; dilp2-Gal4/+; +/-</i>                    | M      | Fed            | 23                         | 4                             | 30                            |
| <i>w-,UAS-sNPF-RNAi(2)/Y; +/-; +/-</i>          | M      | Fed            | 23                         | 6                             | 33                            |
| <i>w-,UAS-sNPF-RNAi(2)/Y; dilp2-Gal4/+; +/-</i> | M      | Fed            | 23                         | 4                             | 31                            |
| <i>w-; dilp2-Gal4/+; +/-</i>                    | M      | Fed            | 23                         | 5                             | 34                            |
| <i>w-,UAS-sNPF-RNAi(2)/Y; +/-; +/-</i>          | M      | Fed            | 23                         | 8                             | 37                            |
| <i>w-,UAS-sNPF-RNAi(2)/Y; dilp2-Gal4/+; +/-</i> | M      | Starved        | 23                         | 6                             | 31                            |

\* The number of flies(n) stated in this table is the number of flies that was used in one of the all trials. For all the details, please check the raw data.

**Statistics - One-way ANOVA with Tukey post hoc test**

**Group 1 (Fed, *dilp2-Gal4 X UAS-sNPFR-DN*)**

| Tukey's multiple comparisons test                 | Mean Diff. | 95.00% CI of diff. | Significant? | Summary | Adjusted P Value |
|---------------------------------------------------|------------|--------------------|--------------|---------|------------------|
| <i>dilp2-Gal4/+ vs. UAS-sNPFR-DN/+</i>            | 2.084      | -9.923 to 14.09    | No           | ns      | 0.8871           |
| <i>dilp2-Gal4/+ vs. dilp2-Gal4/UAS-sNPFR-DN</i>   | 3.243      | -9.910 to 16.40    | No           | ns      | 0.7875           |
| <i>UAS-sNPFR-DN/+ vs. dilp2-Gal4/UAS-sNPFR-DN</i> | 1.159      | -10.85 to 13.17    | No           | ns      | 0.9634           |

**Group 2 (Starved, *dilp2-Gal4 X UAS-sNPFR-DN*)**

| Tukey's multiple comparisons test                 | Mean Diff. | 95.00% CI of diff. | Significant? | Summary | Adjusted P Value |
|---------------------------------------------------|------------|--------------------|--------------|---------|------------------|
| <i>dilp2-Gal4/+ vs. UAS-sNPFR-DN/+</i>            | -15.67     | -38.13 to 6.786    | No           | ns      | 0.2010           |
| <i>dilp2-Gal4/+ vs. dilp2-Gal4/UAS-sNPFR-DN</i>   | 74.68      | 50.82 to 98.54     | Yes          | ***     | <0.0001          |
| <i>UAS-sNPFR-DN/+ vs. dilp2-Gal4/UAS-sNPFR-DN</i> | 90.35      | 69.08 to 111.6     | Yes          | ***     | <0.0001          |

**Figure 5c**

**Sample size**

| Genotype                              | Gender | Feeding status | 30 min incubation                 | Sample size (N) (# of brains) | Sample size (n) (# of cells) |
|---------------------------------------|--------|----------------|-----------------------------------|-------------------------------|------------------------------|
| <i>w-; Crz-Gal4/UAS-mCD8:GFP; +/-</i> | M      | 18 hr Starved  | 80 mM sucrose                     | 5                             | 5                            |
| <i>w-; Crz-Gal4/UAS-mCD8:GFP; +/-</i> | M      | 18 hr Starved  | 80 mM D-glucose                   | 11                            | 11                           |
| <i>w-; Crz-Gal4/UAS-mCD8:GFP; +/-</i> | M      | 18 hr Starved  | 80 mM D-glucose + 0.5 $\mu$ M TTX | 6                             | 6                            |
| <i>w-; Crz-Gal4/UAS-mCD8:GFP; +/-</i> | M      | 18 hr Starved  | 80 mM L-glucose                   | 6                             | 6                            |

**Statistics - One-way ANOVA with Tukey post hoc test**

**Relative sNPF intensity: AHL vs. D-Glc vs. D-Glc/TTX vs. L-Glc**

| Tukey's multiple comparisons test | Mean Diff. | 95.00% CI of diff.   | Significant? | Summary | Adjusted P Value |
|-----------------------------------|------------|----------------------|--------------|---------|------------------|
| AHL vs. D-Glc                     | 0.4514     | 0.1160 to 0.7868     | Yes          | **      | 0.0056           |
| AHL vs. D-Glc/TTX                 | 0.5499     | 0.1733 to 0.9264     | Yes          | **      | 0.0026           |
| AHL vs. L-Glc                     | 0.1845     | -0.1921 to 0.5611    | No           | ns      | 0.5405           |
| D-Glc vs. D-Glc/TTX               | 0.09847    | -0.2172 to 0.4141    | No           | ns      | 0.8248           |
| D-Glc vs. L-Glc                   | -0.2669    | -0.5825 to 0.04877   | No           | ns      | 0.1186           |
| D-Glc/TTX vs. L-Glc               | -0.3653    | -0.7244 to -0.006270 | Yes          | *       | 0.0451           |

## Figure 5d

### Sample size

| Experiments  | Genotype                                                            | Gender | Feeding status | Treatment       | Sample size (N) (# of brains) | Sample size (n) (# of cells) |
|--------------|---------------------------------------------------------------------|--------|----------------|-----------------|-------------------------------|------------------------------|
| Control      | <i>w<sup>-</sup>; dilp2-Gal4, UAS-GCaMP6s/+; +/+</i>                | M      | Fed            | 20 mM D-glucose | 5                             | 37                           |
| Experimental | <i>w<sup>-</sup>; UAS-sNPFR-DN/ Y; dilp2-Gal4/ UAS-GCaMP6s; +/+</i> | M      | Fed            | 20 mM D-glucose | 7                             | 33                           |

### Statistics - Unpaired two-tailed t test

#### Max ΔF/F (%): Control vs. Experimental

##### Unpaired t test

|                                        |                  |
|----------------------------------------|------------------|
| P value                                | <0.0001          |
| P value summary                        | ***              |
| Significantly different (P < 0.05)?    | Yes              |
| One- or two-tailed P value?            | Two-tailed       |
| t, df                                  | t=7.323, df=68   |
| Mean of column A                       | 400.9            |
| Mean of column B                       | 32.74            |
| Difference between means (B - A) ± SEM | -368.2 ± 50.28   |
| 95% confidence interval                | -468.5 to -267.9 |
| R squared (eta squared)                | 0.4409           |

## Figure 5e

### Sample size

| Genotype                                               | Gender | Feeding status | Incubated Temperature (°C) | Sample size (N) (# of brains) | Sample size (n) (# of cells) |
|--------------------------------------------------------|--------|----------------|----------------------------|-------------------------------|------------------------------|
| <i>w<sup>-</sup>; +/+; AKH-Gal4/+</i>                  | M      | Fed            | 23                         | 8                             | 8                            |
| <i>w<sup>-</sup>; UAS-sNPFR-DN/ Y; +/+; +/+</i>        | M      | Fed            | 23                         | 10                            | 10                           |
| <i>w<sup>-</sup>; UAS-sNPFR-DN/ Y; +/+; AKH-Gal4/+</i> | M      | Fed            | 23                         | 9                             | 9                            |

### Statistics - One-way ANOVA with Tukey post hoc test

#### Relative AKH intensity: *AKH-Gal4 X UAS-sNPFR-DN*

| Tukey's multiple comparisons test               | Mean Diff. | 95.00% CI of diff. | Significant? | Summary | Adjusted P Value |
|-------------------------------------------------|------------|--------------------|--------------|---------|------------------|
| <i>AKH-Gal4/+ vs. UAS-sNPFR-DN/+</i>            | 0.1187     | -0.3060 to 0.5434  | No           | ns      | 0.7668           |
| <i>AKH-Gal4/+ vs. UAS-sNPFR-DN/AKH-Gal4</i>     | 0.7158     | 0.2807 to 1.151    | Yes          | **      | 0.0011           |
| <i>UAS-sNPFR-DN/+ vs. UAS-sNPFR-DN/AKH-Gal4</i> | 0.5970     | 0.1857 to 1.008    | Yes          | **      | 0.0037           |

## Figure 5f

### Sample size

| Experiments     | Genotype                               | Gender | Feeding status | Treatment                                          | Sample size (N) (# of animals) | Sample size (n) (# of CCs) |
|-----------------|----------------------------------------|--------|----------------|----------------------------------------------------|--------------------------------|----------------------------|
| Control         | <i>w-; UAS-Arcflight/+; AKH-Gal4/+</i> | M      | Fed            | DMSO only                                          | 8                              | 8                          |
| 80 $\mu$ M sNPF | <i>w-; UAS-Arcflight/+; AKH-Gal4/+</i> | M      | Fed            | 80 $\mu$ M sNPF                                    | 11                             | 11                         |
| Gi inhibitor    | <i>w-; UAS-Arcflight/+; AKH-Gal4/+</i> | M      | Fed            | 80 $\mu$ M sNPF +<br>1 ng/ $\mu$ L pertussis toxin | 8                              | 8                          |
| Gq inhibitor    | <i>w-; UAS-Arcflight/+; AKH-Gal4/+</i> | M      | Fed            | 80 $\mu$ M sNPF +<br>1 $\mu$ M U73122              | 10                             | 10                         |

### Statistics - One-way ANOVA with Tukey post hoc test

#### Max $\Delta F/F$ (%): Control vs. sNPF vs. Gi vs. Gq

| Tukey's multiple comparisons test | Mean Diff. | 95.00% CI of diff. | Significant? | Summary | Adjusted P Value |
|-----------------------------------|------------|--------------------|--------------|---------|------------------|
| Control vs. sNPF                  | -24.30     | -47.01 to -1.584   | Yes          | *       | 0.0323           |
| Control vs. Gi                    | 1.029      | -23.41 to 25.47    | No           | ns      | 0.9995           |
| Control vs. Gq                    | -25.43     | -48.61 to -2.244   | Yes          | *       | 0.0271           |
| sNPF vs. Gi                       | 25.32      | 2.613 to 48.04     | Yes          | *       | 0.0241           |
| sNPF vs. Gq                       | -1.133     | -22.49 to 20.22    | No           | ns      | 0.9989           |
| Gi vs. Gq                         | -26.46     | -49.64 to -3.273   | Yes          | *       | 0.0203           |

## Figure 5g

### Sample size

| Experiments  | Genotype                                | Gender | Feeding status | Treatment                                          | Sample size (N) (# of brains) | Sample size (n) (# of cells) |
|--------------|-----------------------------------------|--------|----------------|----------------------------------------------------|-------------------------------|------------------------------|
| Control      | <i>w-; dilp2-Gal4/ UAS-GCaMP6s; +/+</i> | M      | Fed            | 20 mM D-glucose +<br>1 $\mu$ M U73343              | 5                             | 36                           |
| Gq inhibitor | <i>w-; dilp2-Gal4/ UAS-GCaMP6s; +/+</i> | M      | Fed            | 20 mM D-glucose +<br>1 $\mu$ M U73122              | 8                             | 56                           |
| Gi inhibitor | <i>w-; dilp2-Gal4/ UAS-GCaMP6s; +/+</i> | M      | Fed            | 20 mM D-glucose +<br>1 ng/ $\mu$ L pertussis toxin | 4                             | 21                           |

**Statistics - One-way ANOVA with Tukey post hoc test**

**Max ΔF/F (%): Control vs. sNPF vs. Gi vs. Gq**

| Tukey's multiple comparisons test | Mean Diff. | 95.00% CI of diff. | Significant? | Summary | Adjusted P Value |
|-----------------------------------|------------|--------------------|--------------|---------|------------------|
| Control vs. Gq                    | 456.1      | 350.9 to 561.3     | Yes          | ***     | <0.0001          |
| Control vs. Gi                    | -121.0     | -256.2 to 14.21    | No           | ns      | 0.0892           |
| Gq vs. Gi                         | -577.1     | -703.1 to -451.1   | Yes          | ***     | <0.0001          |

**Figure 5h**

**Sample size**

| Genotype                           | Gender | Feeding status | Incubated Temperature (°C) | Sample size (N) (# of trials) | # of flies in each trial (n) |
|------------------------------------|--------|----------------|----------------------------|-------------------------------|------------------------------|
| w-; +/+; <i>CN-Gal4</i> /+         | M      | Fed            | 23                         | 11                            | 30                           |
| w-; +/+; <i>UAS-Kir2.1</i> /+      | M      | Fed            | 23                         | 12                            | 30                           |
| w-; +/+; <i>UAS-Kir2.1/CN-Gal4</i> | M      | Fed            | 23                         | 11                            | 30                           |
| w-; +/+; <i>CN-Gal4</i> /+         | M      | Starved        | 23                         | 8                             | 30                           |
| w-; +/+; <i>UAS-Kir2.1</i> /+      | M      | Starved        | 23                         | 11                            | 30                           |
| w-; +/+; <i>UAS-Kir2.1/CN-Gal4</i> | M      | Starved        | 23                         | 13                            | 30                           |

**Statistics - One-way ANOVA with Tukey post hoc test**

**Group 1 (Fed, *CN-Gal4* X *UAS-Kir2.1*)**

| Tukey's multiple comparisons test                  | Mean Diff. | 95.00% CI of diff. | Significant? | Summary | Adjusted P Value |
|----------------------------------------------------|------------|--------------------|--------------|---------|------------------|
| <i>CN-Gal4</i> /+ vs. <i>UAS-Kir2.1</i> /+         | 0.3929     | -0.9501 to 1.736   | No           | ns      | 0.7536           |
| <i>CN-Gal4</i> /+ vs. <i>UAS-Kir2.1/CN-Gal4</i>    | -2.027     | -3.399 to -0.6554  | Yes          | **      | 0.0028           |
| <i>UAS-Kir2.1</i> /+ vs. <i>UAS-Kir2.1/CN-Gal4</i> | -2.420     | -3.763 to -1.077   | Yes          | ***     | 0.0003           |

**Group 2 (Starved, *CN-Gal4* X *UAS-Kir2.1*)**

| Tukey's multiple comparisons test                  | Mean Diff. | 95.00% CI of diff. | Significant? | Summary | Adjusted P Value |
|----------------------------------------------------|------------|--------------------|--------------|---------|------------------|
| <i>CN-Gal4</i> /+ vs. <i>UAS-Kir2.1</i> /+         | 0.1620     | -1.335 to 1.659    | No           | ns      | 0.9615           |
| <i>CN-Gal4</i> /+ vs. <i>UAS-Kir2.1/CN-Gal4</i>    | -2.502     | -3.950 to -1.054   | Yes          | ***     | 0.0006           |
| <i>UAS-Kir2.1</i> /+ vs. <i>UAS-Kir2.1/CN-Gal4</i> | -2.664     | -3.984 to -1.343   | Yes          | ***     | <0.0001          |

## Extended Data Figure 1d

### Sample size

Two-choice assay screening: *Vienna Tiles (VT)-Gal4 > UAS-Kir2.1, tub-Gal80<sup>ts</sup>* (95 lines tested)

| Genotype                                           | # of trials | Genotype | # of trials | Genotype | # of trials |
|----------------------------------------------------|-------------|----------|-------------|----------|-------------|
| VT60740                                            | 2           | VT12601  | 3           | VT60202  | 3           |
| VT8136                                             | 2           | VT26397  | 2           | VT31393  | 2           |
| VT0618                                             | 2           | VT33054  | 2           | VT49137  | 1           |
| VT12761                                            | 2           | VT19352  | 1           | VT22113  | 2           |
| VT30332                                            | 2           | VT55380  | 2           | VT7166   | 2           |
| VT43400                                            | 2           | VT45641  | 2           | VT12309  | 2           |
| VT45583                                            | 2           | VT43134  | 1           | VT13500  | 5           |
| VT60740                                            | 2           | VT23818  | 2           | VT23753  | 4           |
| VT40029                                            | 1           | VT39625  | 2           | VT61724  | 3           |
| VT45632                                            | 1           | VT36267  | 2           | VT1208   | 2           |
| VT49136                                            | 1           | VT60736  | 2           | VT30322  | 5           |
| VT24602                                            | 2           | VT9837   | 1           | VT65288  | 3           |
| VT12761                                            | 2           | VT1207   | 2           | VT22112  | 2           |
| VT50661                                            | 2           | VT16127  | 1           | VT18469  | 2           |
| VT65288                                            | 2           | VT43070  | 2           | VT49186  | 2           |
| VT50183                                            | 2           | VT17928  | 2           | VT60736  | 1           |
| VT37865                                            | 2           | VT25972  | 2           | VT27955  | 2           |
| VT39562                                            | 2           | VT63305  | 1           | VT9840   | 2           |
| VT26647                                            | 2           | VT50225  | 2           | VT43925  | 2           |
| VT49902                                            | 2           | VT22113  | 2           | VT19059  | 2           |
| VT32408                                            | 2           | VT43925  | 2           | VT20739  | 1           |
| VT49136                                            | 2           | VT40592  | 2           | VT44330  | 4           |
| VT43132                                            | 2           | VT48029  | 3           | VT61919  | 1           |
| <b>+/<i>UAS-Kir2.1, tub-Gal80<sup>ts</sup></i></b> | <b>37</b>   | VT15988  | 2           | VT30597  | 1           |
| VT22017                                            | 2           | VT44331  | 1           | VT55827  | 2           |
| VT5879                                             | 2           | VT63729  | 2           | VT43147  | 2           |
| VT5058                                             | 1           | VT58963  | 2           | VT58471  | 1           |
| VT61918                                            | 5           | VT1979   | 2           | VT28326  | 3           |
| VT19774                                            | 3           | VT42831  | 1           | VT43145  | 2           |
| VT30297                                            | 2           | VT31494  | 4           | VT6394   | 2           |
| VT20124                                            | 4           | VT49355  | 2           | VT6395   | 1           |
| VT8975                                             | 2           | VT49355  | 2           | VT0465   | 2           |

## Extended Data Figure 1d

### Sample size

| Genotype                                              | Gender | Feeding status | Incubated Temperature (°C) | Sample size (N) (# of trials) | # of flies in each trial (n)* |
|-------------------------------------------------------|--------|----------------|----------------------------|-------------------------------|-------------------------------|
| <i>w-; +/+; UAS-Kir2.1, tub-Gal80ts/+</i>             | M      | Starved        | 23                         | 30                            | 37                            |
| <i>w-; +/+; VT58471-Gal4/+</i>                        | M      | Starved        | 23                         | 8                             | 38                            |
| <i>w-; +/+; VT58471-Gal4/ UAS-Kir2.1, tub-Gal80ts</i> | M      | Starved        | 23                         | 7                             | 32                            |
| <i>w-; +/+; VT43147-Gal4/+</i>                        | M      | Starved        | 23                         | 10                            | 39                            |
| <i>w-; +/+; VT43147-Gal4/ UAS-Kir2.1, tub-Gal80ts</i> | M      | Starved        | 23                         | 7                             | 37                            |
| <i>w-; Crz-Gal4/+; +/+</i>                            | M      | Starved        | 23                         | 10                            | 34                            |
| <i>w-; Crz-Gal4/+; UAS-Kir2.1, tub-Gal80ts/+</i>      | M      | Starved        | 23                         | 24                            | 36                            |

\* The number of files(n) stated in this table is the number of flies that was used in one of the all trials. For all the details, please check the raw data.

**Statistics - One-way ANOVA with Tukey post hoc test**

**Group 1 (Starved, VT58471-Gal4 X UAS-Kir2.1,tub-Gal80ts)**

| Tukey's multiple comparisons test              | Mean Diff. | 95.00% CI of diff. | Significant? | Summary | Adjusted P Value |
|------------------------------------------------|------------|--------------------|--------------|---------|------------------|
| UAS-kir2.1ts / + vs. VT58471-Gal4 / +          | -41.21     | -60.19 to -22.23   | Yes          | ***     | <0.0001          |
| UAS-kir2.1ts / + vs. VT58471-Gal4/UAS-kir2.1ts | 44.37      | 24.35 to 64.40     | Yes          | ***     | <0.0001          |
| VT58471-Gal4 / + vs. VT58471-Gal4/UAS-kir2.1ts | 85.58      | 60.90 to 110.3     | Yes          | ***     | <0.0001          |

**Group 2 (Starved, VT43147-Gal4 X UAS-Kir2.1,tub-Gal80ts)**

| Tukey's multiple comparisons test              | Mean Diff. | 95.00% CI of diff. | Significant? | Summary | Adjusted P Value |
|------------------------------------------------|------------|--------------------|--------------|---------|------------------|
| UAS-kir2.1ts / + vs. VT43147-Gal4 / +          | -35.62     | -54.10 to -17.14   | Yes          | ***     | <0.0001          |
| UAS-kir2.1ts / + vs. VT43147-Gal4/UAS-kir2.1ts | 90.97      | 69.73 to 112.2     | Yes          | ***     | <0.0001          |
| VT43147-Gal4 / + vs. VT43147-Gal4/UAS-kir2.1ts | 126.6      | 101.7 to 151.5     | Yes          | ***     | <0.0001          |

**Group 3 (Starved, Crz-Gal4 X UAS-Kir2.1,tub-Gal80ts)**

| Tukey's multiple comparisons test            | Mean Diff. | 95.00% CI of diff. | Significant? | Summary | Adjusted P Value |
|----------------------------------------------|------------|--------------------|--------------|---------|------------------|
| UAS-kir2.1ts / + vs. Crz-Gal4 / +            | 16.90      | -1.421 to 35.23    | No           | ns      | 0.0765           |
| UAS-kir2.1ts / + vs. Crz-Gal4 / UAS-kir2.1ts | 87.71      | 73.96 to 101.5     | Yes          | ***     | <0.0001          |
| Crz-Gal4 / + vs. Crz-Gal4 / UAS-kir2.1ts     | 70.80      | 51.91 to 89.69     | Yes          | ***     | <0.0001          |

**Extended Data Figure 2c**

**Sample size**

| Genotype                        | Gender | Feeding status | Incubated Temperature (°C) | Sample size (N) (# of trials) | # of flies in each trial (n)* |
|---------------------------------|--------|----------------|----------------------------|-------------------------------|-------------------------------|
| w-; R20F11-LexA/+; +/+          | M      | Fed            | 23                         | 8                             | 40                            |
| w-; +/+; LexAop-TNT/+           | M      | Fed            | 23                         | 11                            | 30                            |
| w-; R20F11-LexA/+; LexAop-TNT/+ | M      | Fed            | 23                         | 8                             | 34                            |
| w-; R20F11-LexA/+; +/+          | M      | Starved        | 23                         | 14                            | 31                            |
| w-; +/+; LexAop-TNT/+           | M      | Starved        | 23                         | 10                            | 31                            |
| w-; R20F11-LexA/+; LexAop-TNT/+ | M      | Starved        | 23                         | 11                            | 32                            |

\* The number of files(n) stated in this table is the number of flies that was used in one of the all trials. For all the details, please check the raw data.

**Statistics - One-way ANOVA with Tukey post hoc test**

**Group 1 (Fed, R20F11-LexA X LexAop-TNT)**

| Tukey's multiple comparisons test         | Mean Diff. | 95.00% CI of diff. | Significant? | Summary | Adjusted P Value |
|-------------------------------------------|------------|--------------------|--------------|---------|------------------|
| R20F11-LexA/+ vs. LexAop-TNT/+            | 7.436      | -5.800 to 20.67    | No           | ns      | 0.3553           |
| R20F11-LexA/+ vs. R20F11-LexA/ LexAop-TNT | 12.99      | -1.253 to 27.23    | No           | ns      | 0.0785           |
| LexAop-TNT/+ vs. R20F11-LexA/ LexAop-TNT  | 5.554      | -7.683 to 18.79    | No           | ns      | 0.5548           |

**Group 2 (Starved, R20F11-LexA X LexAop-TNT)**

| Tukey's multiple comparisons test         | Mean Diff. | 95.00% CI of diff. | Significant? | Summary | Adjusted P Value |
|-------------------------------------------|------------|--------------------|--------------|---------|------------------|
| R20F11-LexA/+ vs. LexAop-TNT/+            | -6.985     | -20.94 to 6.967    | No           | ns      | 0.4444           |
| R20F11-LexA/+ vs. R20F11-LexA/ LexAop-TNT | 75.83      | 62.25 to 89.40     | Yes          | ***     | <0.0001          |
| LexAop-TNT/+ vs. R20F11-LexA/ LexAop-TNT  | 82.81      | 68.09 to 97.53     | Yes          | ***     | <0.0001          |

**Extended Data Figure 3b-e**

**Sample size**

| Genotype                     | Gender | Feeding status | Treatment       | Sample size (N)<br>(# of brains) | Sample size (n)<br>(# of cells) |
|------------------------------|--------|----------------|-----------------|----------------------------------|---------------------------------|
| w-; UAS-GCaMP6s/+; CN-Gal4/+ | M      | Fed            | 1 mM D-glucose  | 7                                | 7                               |
| w-; UAS-GCaMP6s/+; CN-Gal4/+ | M      | Fed            | 2 mM D-glucose  | 9                                | 9                               |
| w-; UAS-GCaMP6s/+; CN-Gal4/+ | M      | Fed            | 5 mM D-glucose  | 9                                | 9                               |
| w-; UAS-GCaMP6s/+; CN-Gal4/+ | M      | Fed            | 10 mM D-glucose | 6                                | 6                               |
| w-; UAS-GCaMP6s/+; CN-Gal4/+ | M      | Fed            | 15 mM D-glucose | 6                                | 6                               |
| w-; UAS-GCaMP6s/+; CN-Gal4/+ | M      | Fed            | 15 mM D-glucose | 8                                | 8                               |

**Statistics - One-way ANOVA with Tukey post hoc test**

**Extended Data Figure 3b - Peak amplitude**

| Tukey's multiple comparisons test | Mean Diff. | 95.00% CI of diff. | Significant? | Summary | Adjusted P Value |
|-----------------------------------|------------|--------------------|--------------|---------|------------------|
| 1 mM vs. 2 mM                     | -37.64     | -227.7 to 152.5    | No           | ns      | 0.9909           |
| 1 mM vs. 5 mM                     | -47.78     | -237.9 to 142.3    | No           | ns      | 0.9736           |
| 1 mM vs. 10 mM                    | -80.50     | -290.4 to 129.4    | No           | ns      | 0.8575           |
| 1 mM vs. 15 mM                    | -93.42     | -303.3 to 116.4    | No           | ns      | 0.7648           |
| 1 mM vs. 20 mM                    | -106.0     | -301.2 to 89.23    | No           | ns      | 0.5865           |
| 2 mM vs. 5 mM                     | -10.14     | -188.0 to 167.7    | No           | ns      | >0.9999          |
| 2 mM vs. 10 mM                    | -42.86     | -241.7 to 156.0    | No           | ns      | 0.9866           |
| 2 mM vs. 15 mM                    | -55.78     | -254.6 to 143.0    | No           | ns      | 0.9579           |
| 2 mM vs. 20 mM                    | -68.36     | -251.7 to 114.9    | No           | ns      | 0.8712           |
| 5 mM vs. 10 mM                    | -32.72     | -231.5 to 166.1    | No           | ns      | 0.9961           |
| 5 mM vs. 15 mM                    | -45.64     | -244.5 to 153.2    | No           | ns      | 0.9823           |
| 5 mM vs. 20 mM                    | -58.22     | -241.5 to 125.1    | No           | ns      | 0.9301           |
| 10 mM vs. 15 mM                   | -12.92     | -230.7 to 204.9    | No           | ns      | >0.9999          |
| 10 mM vs. 20 mM                   | -25.50     | -229.2 to 178.2    | No           | ns      | 0.9990           |
| 15 mM vs. 20 mM                   | -12.58     | -216.3 to 191.1    | No           | ns      | >0.9999          |



**Extended Data Figure 3c - Oscillation number**

| <b>Tukey's multiple comparisons test</b> | <b>Mean Diff.</b> | <b>95.00% CI of diff.</b> | <b>Significant?</b> | <b>Summary</b> | <b>Adjusted P Value</b> |
|------------------------------------------|-------------------|---------------------------|---------------------|----------------|-------------------------|
| 1 mM vs. 2 mM                            | -0.4921           | -11.92 to 10.94           | No                  | ns             | >0.9999                 |
| 1 mM vs. 5 mM                            | -2.270            | -13.70 to 9.161           | No                  | ns             | 0.9908                  |
| 1 mM vs. 10 mM                           | 0.7857            | -11.83 to 13.40           | No                  | ns             | >0.9999                 |
| 1 mM vs. 15 mM                           | 1.452             | -11.17 to 14.07           | No                  | ns             | 0.9993                  |
| 1 mM vs. 20 mM                           | 2.661             | -9.078 to 14.40           | No                  | ns             | 0.9833                  |
| 2 mM vs. 5 mM                            | -1.778            | -12.47 to 8.915           | No                  | ns             | 0.9960                  |
| 2 mM vs. 10 mM                           | 1.278             | -10.68 to 13.23           | No                  | ns             | 0.9995                  |
| 2 mM vs. 15 mM                           | 1.944             | -10.01 to 13.90           | No                  | ns             | 0.9964                  |
| 2 mM vs. 20 mM                           | 3.153             | -7.869 to 14.17           | No                  | ns             | 0.9543                  |
| 5 mM vs. 10 mM                           | 3.056             | -8.899 to 15.01           | No                  | ns             | 0.9717                  |
| 5 mM vs. 15 mM                           | 3.722             | -8.232 to 15.68           | No                  | ns             | 0.9355                  |
| 5 mM vs. 20 mM                           | 4.931             | -6.091 to 15.95           | No                  | ns             | 0.7611                  |
| 10 mM vs. 15 mM                          | 0.6667            | -12.43 to 13.76           | No                  | ns             | >0.9999                 |
| 10 mM vs. 20 mM                          | 1.875             | -10.37 to 14.12           | No                  | ns             | 0.9973                  |
| 15 mM vs. 20 mM                          | 1.208             | -11.04 to 13.46           | No                  | ns             | 0.9997                  |

**Extended Data Figure 4d- Duration**

| <b>Tukey's multiple comparisons test</b> | <b>Mean Diff.</b> | <b>95.00% CI of diff.</b> | <b>Significant?</b> | <b>Summary</b> | <b>Adjusted P Value</b> |
|------------------------------------------|-------------------|---------------------------|---------------------|----------------|-------------------------|
| 1 mM vs. 2 mM                            | 102.0             | -529.8 to 733.8           | No                  | ns             | 0.9965                  |
| 1 mM vs. 5 mM                            | 58.65             | -573.2 to 690.5           | No                  | ns             | 0.9998                  |
| 1 mM vs. 10 mM                           | -57.74            | -755.3 to 639.8           | No                  | ns             | 0.9999                  |
| 1 mM vs. 15 mM                           | -102.7            | -800.3 to 594.8           | No                  | ns             | 0.9977                  |
| 1 mM vs. 20 mM                           | -160.4            | -809.3 to 488.4           | No                  | ns             | 0.9754                  |
| 2 mM vs. 5 mM                            | -43.33            | -634.4 to 547.7           | No                  | ns             | >0.9999                 |
| 2 mM vs. 10 mM                           | -159.7            | -820.5 to 501.1           | No                  | ns             | 0.9778                  |
| 2 mM vs. 15 mM                           | -204.7            | -865.5 to 456.1           | No                  | ns             | 0.9368                  |
| 2 mM vs. 20 mM                           | -262.4            | -871.6 to 346.8           | No                  | ns             | 0.7883                  |
| 5 mM vs. 10 mM                           | -116.4            | -777.2 to 544.4           | No                  | ns             | 0.9947                  |
| 5 mM vs. 15 mM                           | -161.4            | -822.2 to 499.4           | No                  | ns             | 0.9767                  |
| 5 mM vs. 20 mM                           | -219.1            | -828.3 to 390.1           | No                  | ns             | 0.8873                  |
| 10 mM vs. 15 mM                          | -45.00            | -768.9 to 678.9           | No                  | ns             | >0.9999                 |
| 10 mM vs. 20 mM                          | -102.7            | -779.8 to 574.4           | No                  | ns             | 0.9974                  |
| 15 mM vs. 20 mM                          | -57.71            | -734.8 to 619.4           | No                  | ns             | 0.9998                  |

### Extended Data Figure 4e - Oscillation frequency

| Tukey's multiple comparisons test | Mean Diff. | 95.00% CI of diff.    | Significant? | Summary | Adjusted P Value |
|-----------------------------------|------------|-----------------------|--------------|---------|------------------|
| 1 mM vs. 2 mM                     | -0.002154  | -0.01167 to 0.007359  | No           | ns      | 0.9833           |
| 1 mM vs. 5 mM                     | -0.002278  | -0.01179 to 0.007235  | No           | ns      | 0.9786           |
| 1 mM vs. 10 mM                    | 0.001098   | -0.009405 to 0.01160  | No           | ns      | 0.9996           |
| 1 mM vs. 15 mM                    | 0.002351   | -0.008152 to 0.01285  | No           | ns      | 0.9842           |
| 1 mM vs. 20 mM                    | 0.002790   | -0.006980 to 0.01256  | No           | ns      | 0.9547           |
| 2 mM vs. 5 mM                     | -0.0001241 | -0.009023 to 0.008775 | No           | ns      | >0.9999          |
| 2 mM vs. 10 mM                    | 0.003252   | -0.006697 to 0.01320  | No           | ns      | 0.9218           |
| 2 mM vs. 15 mM                    | 0.004505   | -0.005444 to 0.01446  | No           | ns      | 0.7518           |
| 2 mM vs. 20 mM                    | 0.004944   | -0.004229 to 0.01412  | No           | ns      | 0.5940           |
| 5 mM vs. 10 mM                    | 0.003377   | -0.006573 to 0.01333  | No           | ns      | 0.9095           |
| 5 mM vs. 15 mM                    | 0.004630   | -0.005320 to 0.01458  | No           | ns      | 0.7303           |
| 5 mM vs. 20 mM                    | 0.005069   | -0.004105 to 0.01424  | No           | ns      | 0.5683           |
| 10 mM vs. 15 mM                   | 0.001253   | -0.009646 to 0.01215  | No           | ns      | 0.9993           |
| 10 mM vs. 20 mM                   | 0.001692   | -0.008503 to 0.01189  | No           | ns      | 0.9960           |
| 15 mM vs. 20 mM                   | 0.0004390  | -0.009756 to 0.01063  | No           | ns      | >0.9999          |

### Extended Data Figure 3g-j

#### Sample size

| Genotype                                       | Gender | Feeding status | Treatment      | Sample size (N)<br>(# of brains) | Sample size (n)<br>(# of cells) |
|------------------------------------------------|--------|----------------|----------------|----------------------------------|---------------------------------|
| <i>w<sup>-</sup>; UAS-GCaMP6s/+; CN-Gal4/+</i> | M      | Fed            | 20 mM sucrose  | 4                                | 4                               |
| <i>w<sup>-</sup>; UAS-GCaMP6s/+; CN-Gal4/+</i> | M      | Fed            | 20 mM pyruvate | 4                                | 4                               |
| <i>w<sup>-</sup>; UAS-GCaMP6s/+; CN-Gal4/+</i> | M      | Fed            | 1X L-(10)EAAs  | 3                                | 3                               |

#### Statistics - One-way ANOVA with Tukey post hoc test

#### Extended Data Figure 3g- Peak amplitude

| Tukey's multiple comparisons test | Mean Diff. | 95.00% CI of diff. | Significant? | Summary | Adjusted P Value |
|-----------------------------------|------------|--------------------|--------------|---------|------------------|
| 20 mM sucrose vs. 20 mM pyruvate  | -364.3     | -648.9 to -79.58   | Yes          | *       | 0.0158           |
| 20 mM sucrose vs. 1 X L-(10)EAAs  | -20.50     | -328.0 to 287.0    | No           | ns      | 0.9802           |
| 20 mM pyruvate vs. 1 X L-(10)EAAs | 343.8      | 36.27 to 651.2     | Yes          | *       | 0.0305           |

### Extended Data Figure 3h - Oscillation number

| Tukey's multiple comparisons test | Mean Diff. | 95.00% CI of diff. | Significant? | Summary | Adjusted P Value |
|-----------------------------------|------------|--------------------|--------------|---------|------------------|
| 20 mM sucrose vs. 20 mM pyruvate  | -6.500     | -11.07 to -1.926   | Yes          | **      | 0.0090           |
| 20 mM sucrose vs. 1 X L-(10)EAAs  | 0.000      | -4.941 to 4.941    | No           | ns      | >0.9999          |
| 20 mM pyruvate vs. 1 X L-(10)EAAs | 6.500      | 1.559 to 11.44     | Yes          | *       | 0.0137           |

### Extended Data Figure 3i - Duration

| Tukey's multiple comparisons test | Mean Diff. | 95.00% CI of diff. | Significant? | Summary | Adjusted P Value |
|-----------------------------------|------------|--------------------|--------------|---------|------------------|
| 20 mM sucrose vs. 20 mM pyruvate  | -968.8     | -1597 to -340.7    | Yes          | **      | 0.0057           |
| 20 mM sucrose vs. 1 X L-(10)EAAs  | 0.000      | -678.4 to 678.4    | No           | ns      | >0.9999          |
| 20 mM pyruvate vs. 1 X L-(10)EAAs | 968.8      | 290.3 to 1647      | Yes          | **      | 0.0088           |

### Extended Data Figure 3j - Oscillation frequency

| Tukey's multiple comparisons test | Mean Diff. | 95.00% CI of diff.     | Significant? | Summary | Adjusted P Value |
|-----------------------------------|------------|------------------------|--------------|---------|------------------|
| 20 mM sucrose vs. 20 mM pyruvate  | -0.009318  | -0.01811 to -0.0005286 | Yes          | *       | 0.0389           |
| 20 mM sucrose vs. 1 X L-(10)EAAs  | 0.000      | -0.009494 to 0.009494  | No           | ns      | >0.9999          |
| 20 mM pyruvate vs. 1 X L-(10)EAAs | 0.009318   | -0.0001757 to 0.01881  | No           | ns      | 0.0540           |

### Extended Data Figure 4a

#### Sample size

| Genotype                                            | Gender | Feeding status | Incubated Temperature (°C) | Sample size (N) (# of trials) | # of flies in each trial (n)* |
|-----------------------------------------------------|--------|----------------|----------------------------|-------------------------------|-------------------------------|
| <i>w<sup>-</sup>; +/+; CN-Gal4/+</i>                | M      | Fed            | 23                         | 8                             | 32                            |
| <i>w<sup>-</sup>; +/+; UAS-Glut1-RNAi/+</i>         | M      | Fed            | 23                         | 7                             | 32                            |
| <i>w<sup>-</sup>; +/+; CN-Gal4/UAS-Glut1-RNAi</i>   | M      | Fed            | 23                         | 4                             | 33                            |
| <i>w<sup>-</sup>; +/+; UAS-Glut4EF-RNAi/+</i>       | M      | Fed            | 23                         | 5                             | 32                            |
| <i>w<sup>-</sup>; +/+; CN-Gal4/UAS-Glut4EF-RNAi</i> | M      | Fed            | 23                         | 5                             | 32                            |
| <i>w<sup>-</sup>; UAS-Sut1-RNAi/+; +/+</i>          | M      | Fed            | 23                         | 5                             | 30                            |
| <i>w<sup>-</sup>; UAS-Sut1-RNAi /+; CN-Gal4/+</i>   | M      | Fed            | 23                         | 3                             | 31                            |
| <i>w<sup>-</sup>; UAS-Sut2-RNAi/+; +/+</i>          | M      | Fed            | 23                         | 4                             | 36                            |
| <i>w<sup>-</sup>; UAS-Sut2-RNAi /+; CN-Gal4/+</i>   | M      | Fed            | 23                         | 4                             | 40                            |
| <i>w<sup>-</sup>; UAS-Slv-RNAi/+; +/+</i>           | M      | Fed            | 23                         | 5                             | 44                            |
| <i>w<sup>-</sup>; UAS-Slv-RNAi /+; CN-Gal4/+</i>    | M      | Fed            | 23                         | 4                             | 28                            |
| <i>w<sup>-</sup>; +/+; UAS-Smvt-RNAi/+</i>          | M      | Fed            | 23                         | 5                             | 31                            |
| <i>w<sup>-</sup>; +/+; CN-Gal4/UAS-Smvt-RNAi</i>    | M      | Fed            | 23                         | 5                             | 32                            |
| <i>w<sup>-</sup>; +/+; CN-Gal4/+</i>                | M      | Starved        | 23                         | 8                             | 31                            |
| <i>w<sup>-</sup>; +/+; UAS-Glut1-RNAi/+</i>         | M      | Starved        | 23                         | 8                             | 32                            |
| <i>w<sup>-</sup>; +/+; CN-Gal4/UAS-Glut1-RNAi</i>   | M      | Starved        | 23                         | 5                             | 33                            |
| <i>w<sup>-</sup>; +/+; UAS-Glut4EF-RNAi/+</i>       | M      | Starved        | 23                         | 5                             | 35                            |
| <i>w<sup>-</sup>; +/+; CN-Gal4/UAS-Glut4EF-RNAi</i> | M      | Starved        | 23                         | 5                             | 32                            |
| <i>w<sup>-</sup>; UAS-Sut1-RNAi/+; +/+</i>          | M      | Starved        | 23                         | 3                             | 33                            |
| <i>w<sup>-</sup>; UAS-Sut1-RNAi /+; CN-Gal4/+</i>   | M      | Starved        | 23                         | 3                             | 31                            |
| <i>w<sup>-</sup>; UAS-Sut2-RNAi/+; +/+</i>          | M      | Starved        | 23                         | 4                             | 32                            |
| <i>w<sup>-</sup>; UAS-Sut2-RNAi /+; CN-Gal4/+</i>   | M      | Starved        | 23                         | 4                             | 34                            |
| <i>w<sup>-</sup>; UAS-Slv-RNAi/+; +/+</i>           | M      | Starved        | 23                         | 5                             | 34                            |
| <i>w<sup>-</sup>; UAS-Slv-RNAi /+; CN-Gal4/+</i>    | M      | Starved        | 23                         | 5                             | 37                            |
| <i>w<sup>-</sup>; +/+; UAS-Smvt-RNAi/+</i>          | M      | Starved        | 23                         | 4                             | 31                            |
| <i>w<sup>-</sup>; +/+; CN-Gal4/UAS-Smvt-RNAi</i>    | M      | Starved        | 23                         | 6                             | 32                            |

\* The number of flies(n) stated in this table is the number of flies that was used in one of the all trials. For all the details, please check the raw data.

Statistics - One-way ANOVA with Tukey post hoc test

Group 1 (Fed, *CN-Gal4 X UAS-Glut1-RNAi(3)*)

| Tukey's multiple comparisons test                | Mean Diff. | 95.00% CI of diff. | Significant? | Summary | Adjusted P Value |
|--------------------------------------------------|------------|--------------------|--------------|---------|------------------|
| <i>CN-Gal4/+ vs. Glut1-RNAi(3)/+</i>             | -2.843     | -20.21 to 14.53    | No           | ns      | 0.9069           |
| <i>CN-Gal4/+ vs. Glut1-RNAi(3)/CN-Gal4</i>       | 5.661      | -14.89 to 26.21    | No           | ns      | 0.7607           |
| <i>Glut1-RNAi(3)/+ vs. Glut1-RNAi(3)/CN-Gal4</i> | 8.504      | -12.53 to 29.54    | No           | ns      | 0.5615           |

Group 2 (Starved, *CN-Gal4 X UAS-Glut1-RNAi(3)*)

| Tukey's multiple comparisons test                | Mean Diff. | 95.00% CI of diff. | Significant? | Summary | Adjusted P Value |
|--------------------------------------------------|------------|--------------------|--------------|---------|------------------|
| <i>CN-Gal4/+ vs. Glut1-RNAi(3)/+</i>             | 5.306      | -16.05 to 26.66    | No           | ns      | 0.8034           |
| <i>CN-Gal4/+ vs. Glut1-RNAi(3)/CN-Gal4</i>       | 137.8      | 113.5 to 162.2     | Yes          | ***     | <0.0001          |
| <i>Glut1-RNAi(3)/+ vs. Glut1-RNAi(3)/CN-Gal4</i> | 132.5      | 108.2 to 156.9     | Yes          | ***     | <0.0001          |

Group 3 (Fed, *CN-Gal4 X UAS-Glut4EF-RNAi(3)*)

| Tukey's multiple comparisons test                    | Mean Diff. | 95.00% CI of diff. | Significant? | Summary | Adjusted P Value |
|------------------------------------------------------|------------|--------------------|--------------|---------|------------------|
| <i>CN-Gal4/+ vs. Glut4EF-RNAi(3)/+</i>               | 3.417      | -19.42 to 26.26    | No           | ns      | 0.9194           |
| <i>CN-Gal4/+ vs. Glut4EF-RNAi(3)/CN-Gal4</i>         | 6.345      | -14.92 to 27.61    | No           | ns      | 0.7203           |
| <i>Glut4EF-RNAi(3)/+ vs. Glut4EF-RNAi(3)/CN-Gal4</i> | 2.928      | -22.09 to 27.95    | No           | ns      | 0.9498           |

Group 4 (Starved, *CN-Gal4 X UAS-Glut4EF-RNAi(3)*)

| Tukey's multiple comparisons test                    | Mean Diff. | 95.00% CI of diff. | Significant? | Summary | Adjusted P Value |
|------------------------------------------------------|------------|--------------------|--------------|---------|------------------|
| <i>CN-Gal4/+ vs. Glut4EF-RNAi(3)/+</i>               | 5.999      | -17.41 to 29.41    | No           | ns      | 0.7865           |
| <i>CN-Gal4/+ vs. Glut4EF-RNAi(3)/CN-Gal4</i>         | 17.70      | -5.707 to 41.12    | No           | ns      | 0.1555           |
| <i>Glut4EF-RNAi(3)/+ vs. Glut4EF-RNAi(3)/CN-Gal4</i> | 11.70      | -14.27 to 37.68    | No           | ns      | 0.4878           |

Group 5 (Fed, *CN-Gal4 X UAS-Sut1-RNAi(2)*)

| Tukey's multiple comparisons test              | Mean Diff. | 95.00% CI of diff. | Significant? | Summary | Adjusted P Value |
|------------------------------------------------|------------|--------------------|--------------|---------|------------------|
| <i>CN-Gal4/+ vs. Sut1-RNAi(2)/+</i>            | -6.778     | -29.94 to 16.38    | No           | ns      | 0.7214           |
| <i>CN-Gal4/+ vs. Sut1-RNAi(2)/CN-Gal4</i>      | -4.748     | -30.35 to 20.86    | No           | ns      | 0.8752           |
| <i>Sut1-RNAi(2)/+ vs. Sut1-RNAi(2)/CN-Gal4</i> | 2.030      | -26.86 to 30.92    | No           | ns      | 0.9808           |

Group 6 (Starved, *CN-Gal4 X UAS-Sut1-RNAi(2)*)

| Tukey's multiple comparisons test              | Mean Diff. | 95.00% CI of diff. | Significant? | Summary | Adjusted P Value |
|------------------------------------------------|------------|--------------------|--------------|---------|------------------|
| <i>CN-Gal4/+ vs. Sut1-RNAi(2)/+</i>            | -0.7974    | -24.96 to 23.37    | No           | ns      | 0.9956           |
| <i>CN-Gal4/+ vs. Sut1-RNAi(2)/CN-Gal4</i>      | -7.382     | -31.55 to 16.78    | No           | ns      | 0.6960           |
| <i>Sut1-RNAi(2)/+ vs. Sut1-RNAi(2)/CN-Gal4</i> | -6.584     | -35.73 to 22.56    | No           | ns      | 0.8176           |

**Group 7 (Fed, *CN-Gal4 X UAS-Sut2-RNAi(2)*)**

| Tukey's multiple comparisons test              | Mean Diff. | 95.00% CI of diff. | Significant? | Summary | Adjusted P Value |
|------------------------------------------------|------------|--------------------|--------------|---------|------------------|
| <i>CN-Gal4/+ vs. Sut2-RNAi(2)/+</i>            | -13.29     | -35.83 to 9.253    | No           | ns      | 0.2983           |
| <i>CN-Gal4/+ vs. Sut2-RNAi(2)/CN-Gal4</i>      | -2.886     | -25.42 to 19.65    | No           | ns      | 0.9392           |
| <i>Sut2-RNAi(2)/+ vs. Sut2-RNAi(2)/CN-Gal4</i> | 10.40      | -15.62 to 36.43    | No           | ns      | 0.5570           |

**Group 8 (Starved, *CN-Gal4 X UAS-Sut2-RNAi(2)*)**

| Tukey's multiple comparisons test              | Mean Diff. | 95.00% CI of diff. | Significant? | Summary | Adjusted P Value |
|------------------------------------------------|------------|--------------------|--------------|---------|------------------|
| <i>CN-Gal4/+ vs. Sut2-RNAi(2)/+</i>            | -7.556     | -32.01 to 16.90    | No           | ns      | 0.7002           |
| <i>CN-Gal4/+ vs. Sut2-RNAi(2)/CN-Gal4</i>      | 12.43      | -12.02 to 36.89    | No           | ns      | 0.3981           |
| <i>Sut2-RNAi(2)/+ vs. Sut2-RNAi(2)/CN-Gal4</i> | 19.99      | -8.252 to 48.23    | No           | ns      | 0.1869           |

**Group 9 (Fed, *CN-Gal4 X UAS-slv-RNAi(3)*)**

| Tukey's multiple comparisons test            | Mean Diff. | 95.00% CI of diff. | Significant? | Summary | Adjusted P Value |
|----------------------------------------------|------------|--------------------|--------------|---------|------------------|
| <i>CN-Gal4/+ vs. Slv-RNAi(3)/+</i>           | -2.936     | -24.80 to 18.93    | No           | ns      | 0.9345           |
| <i>CN-Gal4/+ vs. Slv-RNAi(3)/CN-Gal4</i>     | -5.131     | -28.62 to 18.36    | No           | ns      | 0.8371           |
| <i>Slv-RNAi(3)/+ vs. Slv-RNAi(3)/CN-Gal4</i> | -2.195     | -27.93 to 23.54    | No           | ns      | 0.9729           |

**Group 10 (Starved, *CN-Gal4 X UAS-slv-RNAi(3)*)**

| Tukey's multiple comparisons test            | Mean Diff. | 95.00% CI of diff. | Significant? | Summary | Adjusted P Value |
|----------------------------------------------|------------|--------------------|--------------|---------|------------------|
| <i>CN-Gal4/+ vs. Slv-RNAi(3)/+</i>           | -7.514     | -26.56 to 11.53    | No           | ns      | 0.5733           |
| <i>CN-Gal4/+ vs. Slv-RNAi(3)/CN-Gal4</i>     | 1.977      | -17.07 to 21.02    | No           | ns      | 0.9608           |
| <i>Slv-RNAi(3)/+ vs. Slv-RNAi(3)/CN-Gal4</i> | 9.491      | -11.64 to 30.62    | No           | ns      | 0.4901           |

**Group 11 (Fed, *CN-Gal4 X UAS-smvt-RNAi(2)*)**

| Tukey's multiple comparisons test              | Mean Diff. | 95.00% CI of diff. | Significant? | Summary | Adjusted P Value |
|------------------------------------------------|------------|--------------------|--------------|---------|------------------|
| <i>CN-Gal4/+ vs. Smvt-RNAi(2)/+</i>            | -17.49     | -40.96 to 5.994    | No           | ns      | 0.1634           |
| <i>CN-Gal4/+ vs. Smvt-RNAi(2)/CN-Gal4</i>      | -13.24     | -36.72 to 10.24    | No           | ns      | 0.3351           |
| <i>Smvt-RNAi(2)/+ vs. Smvt-RNAi(2)/CN-Gal4</i> | 4.249      | -21.80 to 30.30    | No           | ns      | 0.9064           |

**Group 12 (Starved, *CN-Gal4 X UAS-smvt-RNAi(2)*)**

| Tukey's multiple comparisons test              | Mean Diff. | 95.00% CI of diff. | Significant? | Summary | Adjusted P Value |
|------------------------------------------------|------------|--------------------|--------------|---------|------------------|
| <i>CN-Gal4/+ vs. Smvt-RNAi(2)/+</i>            | 6.094      | -17.21 to 29.40    | No           | ns      | 0.7789           |
| <i>CN-Gal4/+ vs. Smvt-RNAi(2)/CN-Gal4</i>      | 6.761      | -13.79 to 27.31    | No           | ns      | 0.6760           |
| <i>Smvt-RNAi(2)/+ vs. Smvt-RNAi(2)/CN-Gal4</i> | 0.6675     | -23.90 to 25.23    | No           | ns      | 0.9973           |

## Extended Data Figure 4b

### Sample size

| Genotype                                          | Gender | Feeding status | Incubated Temperature (°C) | Sample size (N) (# of trials) | # of flies in each trial (n)* |
|---------------------------------------------------|--------|----------------|----------------------------|-------------------------------|-------------------------------|
| <i>w<sup>-</sup>; +/+; CN-Gal4/+</i>              | M      | Fed            | 23                         | 8                             | 32                            |
| <i>w<sup>-</sup>; +/+; UAS-HexC-RNAi/+</i>        | M      | Fed            | 23                         | 6                             | 34                            |
| <i>w<sup>-</sup>; +/+; CN-Gal4/UAS-HexC-RNAi</i>  | M      | Fed            | 23                         | 4                             | 28                            |
| <i>w<sup>-</sup>; +/+; UAS-HexT2-RNAi/+</i>       | M      | Fed            | 23                         | 6                             | 33                            |
| <i>w<sup>-</sup>; +/+; CN-Gal4/UAS-HexT2-RNAi</i> | M      | Fed            | 23                         | 7                             | 32                            |
| <i>w<sup>-</sup>; +/+; UAS-HexA-RNAi/+</i>        | M      | Fed            | 23                         | 4                             | 30                            |
| <i>w<sup>-</sup>; +/+; CN-Gal4/UAS-HexA-RNAi</i>  | M      | Fed            | 23                         | 5                             | 36                            |
| <i>w<sup>-</sup>; +/+; CN-Gal4/+</i>              | M      | Starved        | 23                         | 8                             | 31                            |
| <i>w<sup>-</sup>; +/+; UAS-HexC-RNAi/+</i>        | M      | Starved        | 23                         | 4                             | 34                            |
| <i>w<sup>-</sup>; +/+; CN-Gal4/UAS-HexC-RNAi</i>  | M      | Starved        | 23                         | 7                             | 35                            |
| <i>w<sup>-</sup>; +/+; UAS-HexT2-RNAi/+</i>       | M      | Starved        | 23                         | 6                             | 35                            |
| <i>w<sup>-</sup>; +/+; CN-Gal4/UAS-HexT2-RNAi</i> | M      | Starved        | 23                         | 7                             | 33                            |
| <i>w<sup>-</sup>; +/+; UAS-HexA-RNAi/+</i>        | M      | Starved        | 23                         | 7                             | 30                            |
| <i>w<sup>-</sup>; +/+; CN-Gal4/UAS-HexA-RNAi</i>  | M      | Starved        | 23                         | 7                             | 34                            |

\* The number of flies(n) stated in this table is the number of flies that was used in one of the all trials. For all the details, please check the raw data.

### Statistics - One-way ANOVA with Tukey post hoc test

#### Group 1 (Fed, *CN-Gal4 X UAS-HexC-RNAi(3)*)

| Tukey's multiple comparisons test              | Mean Diff. | 95.00% CI of diff. | Significant? | Summary | Adjusted P Value |
|------------------------------------------------|------------|--------------------|--------------|---------|------------------|
| <i>CN-Gal4/+ vs. HexC-RNAi(3)/+</i>            | 7.446      | -9.881 to 24.77    | No           | ns      | 0.5192           |
| <i>CN-Gal4/+ vs. HexC-RNAi(3)/CN-Gal4</i>      | 11.93      | -7.713 to 31.58    | No           | ns      | 0.2851           |
| <i>HexC-RNAi(3)/+ vs. HexC-RNAi(3)/CN-Gal4</i> | 4.489      | -16.22 to 25.20    | No           | ns      | 0.8415           |

#### Group 2 (Starved, *CN-Gal4 X UAS-HexC-RNAi(3)*)

| Tukey's multiple comparisons test              | Mean Diff. | 95.00% CI of diff. | Significant? | Summary | Adjusted P Value |
|------------------------------------------------|------------|--------------------|--------------|---------|------------------|
| <i>CN-Gal4/+ vs. HexC-RNAi(3)/+</i>            | 6.129      | -18.97 to 31.23    | No           | ns      | 0.8060           |
| <i>CN-Gal4/+ vs. HexC-RNAi(3)/CN-Gal4</i>      | 121.6      | 100.4 to 142.8     | Yes          | ***     | <0.0001          |
| <i>HexC-RNAi(3)/+ vs. HexC-RNAi(3)/CN-Gal4</i> | 115.5      | 89.77 to 141.1     | Yes          | ***     | <0.0001          |

#### Group 3 (Fed, *CN-Gal4 X UAS-HexT2-RNAi(3)*)

| Tukey's multiple comparisons test                | Mean Diff. | 95.00% CI of diff. | Significant? | Summary | Adjusted P Value |
|--------------------------------------------------|------------|--------------------|--------------|---------|------------------|
| <i>CN-Gal4/+ vs. HexT2-RNAi(3)/+</i>             | 12.57      | -4.849 to 29.99    | No           | ns      | 0.1846           |
| <i>CN-Gal4/+ vs. HexT2-RNAi(3)/CN-Gal4</i>       | 7.948      | -8.746 to 24.64    | No           | ns      | 0.4598           |
| <i>HexT2-RNAi(3)/+ vs. HexT2-RNAi(3)/CN-Gal4</i> | -4.623     | -22.57 to 13.32    | No           | ns      | 0.7906           |

**Group 4 (Starved, *CN-Gal4 X UAS-HexT2-RNAi(3)*)**

| Tukey's multiple comparisons test                | Mean Diff. | 95.00% CI of diff. | Significant? | Summary | Adjusted P Value |
|--------------------------------------------------|------------|--------------------|--------------|---------|------------------|
| <i>CN-Gal4/+ vs. HexT2-RNAi(3)/+</i>             | 5.754      | -10.44 to 21.94    | No           | ns      | 0.6429           |
| <i>CN-Gal4/+ vs. HexT2-RNAi(3)/CN-Gal4</i>       | 14.99      | -0.5211 to 30.51   | No           | ns      | 0.0592           |
| <i>HexT2-RNAi(3)/+ vs. HexT2-RNAi(3)/CN-Gal4</i> | 9.241      | -7.438 to 25.92    | No           | ns      | 0.3549           |

**Group 5 (Fed, *CN-Gal4 X UAS-HexA-RNAi(3)*)**

| Tukey's multiple comparisons test              | Mean Diff. | 95.00% CI of diff. | Significant? | Summary | Adjusted P Value |
|------------------------------------------------|------------|--------------------|--------------|---------|------------------|
| <i>CN-Gal4/+ vs. HexA-RNAi(3)/+</i>            | -3.806     | -23.69 to 16.08    | No           | ns      | 0.8720           |
| <i>CN-Gal4/+ vs. HexA-RNAi(3)/CN-Gal4</i>      | 1.448      | -17.07 to 19.96    | No           | ns      | 0.9772           |
| <i>HexA-RNAi(3)/+ vs. HexA-RNAi(3)/CN-Gal4</i> | 5.254      | -16.53 to 27.04    | No           | ns      | 0.8057           |

**Group 6 (Starved, *CN-Gal4 X UAS-HexA-RNAi(3)*)**

| Tukey's multiple comparisons test              | Mean Diff. | 95.00% CI of diff. | Significant? | Summary | Adjusted P Value |
|------------------------------------------------|------------|--------------------|--------------|---------|------------------|
| <i>CN-Gal4/+ vs. HexA-RNAi(3)/+</i>            | 5.851      | -8.950 to 20.65    | No           | ns      | 0.5832           |
| <i>CN-Gal4/+ vs. HexA-RNAi(3)/CN-Gal4</i>      | 8.338      | -6.463 to 23.14    | No           | ns      | 0.3455           |
| <i>HexA-RNAi(3)/+ vs. HexA-RNAi(3)/CN-Gal4</i> | 2.487      | -12.80 to 17.77    | No           | ns      | 0.9106           |

**Extended Data Figure 4c**

**Sample size**

| Genotype                                 | Gender | Feeding status | Incubated Temperature (°C) | Sample size (N) (# of trials) | # of flies in each trial (n)* |
|------------------------------------------|--------|----------------|----------------------------|-------------------------------|-------------------------------|
| <i>w-; +/+; CN-Gal4/+</i>                | M      | Fed            | 23                         | 8                             | 32                            |
| <i>w-; UAS-SUR1-RNAi/+; +/+</i>          | M      | Fed            | 23                         | 3                             | 37                            |
| <i>w-; UAS-SUR1-RNAi /+; CN-Gal4</i>     | M      | Fed            | 23                         | 5                             | 38                            |
| <i>w-; +/+; UAS-SUR1-RNAi/+</i>          | M      | Fed            | 23                         | 4                             | 33                            |
| <i>w-; +/+; CN-Gal4/UAS-SUR1-RNAi</i>    | M      | Fed            | 23                         | 5                             | 35                            |
| <i>w-; +/+; UAS-Ca-α1D-RNAi/+</i>        | M      | Fed            | 23                         | 3                             | 38                            |
| <i>w-; +/+; CN-Gal4/ UAS-Ca-α1D-RNAi</i> | M      | Fed            | 23                         | 4                             | 35                            |
| <i>w-; +/+; CN-Gal4/+</i>                | M      | Starved        | 23                         | 8                             | 31                            |
| <i>w-; UAS-SUR1-RNAi/+; +/+</i>          | M      | Starved        | 23                         | 5                             | 34                            |
| <i>w-; UAS-SUR1-RNAi /+; CN-Gal4</i>     | M      | Starved        | 23                         | 5                             | 43                            |
| <i>w-; +/+; UAS-SUR1-RNAi/+</i>          | M      | Starved        | 23                         | 6                             | 35                            |
| <i>w-; +/+; CN-Gal4/UAS-SUR1-RNAi</i>    | M      | Starved        | 23                         | 6                             | 36                            |
| <i>w-; +/+; UAS-Ca-α1D-RNAi/+</i>        | M      | Starved        | 23                         | 5                             | 37                            |
| <i>w-; +/+; CN-Gal4/ UAS-Ca-α1D-RNAi</i> | M      | Starved        | 23                         | 4                             | 28                            |

\* The number of files(n) stated in this table is the number of flies that was used in one of the all trials. For all the details, please check the raw data.

**Statistics - One-way ANOVA with Tukey post hoc test**

**Group 1 (Fed, *CN-Gal4 X UAS-SUR1-RNAi(2)*)**

| Tukey's multiple comparisons test            | Mean Diff. | 95.00% CI of diff. | Significant? | Summary | Adjusted P Value |
|----------------------------------------------|------------|--------------------|--------------|---------|------------------|
| <i>CN-Gal4/+ vs. SUR-RNAi(2)/+</i>           | -16.31     | -41.71 to 9.098    | No           | ns      | 0.2440           |
| <i>CN-Gal4/+ vs. SUR-RNAi(2)/CN-Gal4</i>     | 4.598      | -16.79 to 25.99    | No           | ns      | 0.8394           |
| <i>SUR-RNAi(2)/+ vs. SUR-RNAi(2)/CN-Gal4</i> | 20.90      | -6.499 to 48.31    | No           | ns      | 0.1480           |

**Group 2 (Starved, *CN-Gal4 X UAS-SUR1-RNAi(2)*)**

| Tukey's multiple comparisons test            | Mean Diff. | 95.00% CI of diff. | Significant? | Summary | Adjusted P Value |
|----------------------------------------------|------------|--------------------|--------------|---------|------------------|
| <i>CN-Gal4/+ vs. SUR-RNAi(2)/+</i>           | -4.787     | -24.24 to 14.67    | No           | ns      | 0.8012           |
| <i>CN-Gal4/+ vs. SUR-RNAi(2)/CN-Gal4</i>     | 117.7      | 98.23 to 137.1     | Yes          | ***     | <0.0001          |
| <i>SUR-RNAi(2)/+ vs. SUR-RNAi(2)/CN-Gal4</i> | 122.5      | 100.9 to 144.1     | Yes          | ***     | <0.0001          |

**Group 3 (Fed, *CN-Gal4 X UAS-SUR1-RNAi(3)*)**

| Tukey's multiple comparisons test            | Mean Diff. | 95.00% CI of diff. | Significant? | Summary | Adjusted P Value |
|----------------------------------------------|------------|--------------------|--------------|---------|------------------|
| <i>CN-Gal4/+ vs. SUR-RNAi(3)/+</i>           | 11.15      | -8.236 to 30.55    | No           | ns      | 0.3182           |
| <i>CN-Gal4/+ vs. SUR-RNAi(3)/CN-Gal4</i>     | -7.257     | -25.31 to 10.79    | No           | ns      | 0.5577           |
| <i>SUR-RNAi(3)/+ vs. SUR-RNAi(3)/CN-Gal4</i> | -18.41     | -39.65 to 2.829    | No           | ns      | 0.0939           |

**Group 4 (Starved, *CN-Gal4 X UAS-SUR1-RNAi(3)*)**

| Tukey's multiple comparisons test            | Mean Diff. | 95.00% CI of diff. | Significant? | Summary | Adjusted P Value |
|----------------------------------------------|------------|--------------------|--------------|---------|------------------|
| <i>CN-Gal4/+ vs. SUR-RNAi(3)/+</i>           | 1.790      | -20.51 to 24.09    | No           | ns      | 0.9769           |
| <i>CN-Gal4/+ vs. SUR-RNAi(3)/CN-Gal4</i>     | 128.7      | 106.4 to 151.0     | Yes          | ***     | <0.0001          |
| <i>SUR-RNAi(3)/+ vs. SUR-RNAi(3)/CN-Gal4</i> | 126.9      | 103.0 to 150.7     | Yes          | ***     | <0.0001          |

**Group 5 (Fed, *CN-Gal4 X UAS-Ca-1αD-RNAi(3)*)**

| Tukey's multiple comparisons test    | Mean Diff. | 95.00% CI of diff. | Significant? | Summary | Adjusted P Value |
|--------------------------------------|------------|--------------------|--------------|---------|------------------|
| <i>CN-Gal4/+ vs. Ca-RNAi/+</i>       | 4.619      | -18.06 to 27.30    | No           | ns      | 0.8518           |
| <i>CN-Gal4/+ vs. Ca-RNAi/CN-Gal4</i> | -1.364     | -21.88 to 19.15    | No           | ns      | 0.9828           |
| <i>Ca-RNAi/+ vs. Ca-RNAi/CN-Gal4</i> | -5.983     | -31.57 to 19.61    | No           | ns      | 0.8101           |

**Group 6 (Starved, *CN-Gal4 X UAS-Ca-1αD-RNAi(3)*)**

| Tukey's multiple comparisons test    | Mean Diff. | 95.00% CI of diff. | Significant? | Summary | Adjusted P Value |
|--------------------------------------|------------|--------------------|--------------|---------|------------------|
| <i>CN-Gal4/+ vs. Ca-RNAi/+</i>       | 0.6117     | -20.79 to 22.02    | No           | ns      | 0.9969           |
| <i>CN-Gal4/+ vs. Ca-RNAi/CN-Gal4</i> | 112.4      | 89.43 to 135.4     | Yes          | ***     | <0.0001          |
| <i>Ca-RNAi/+ vs. Ca-RNAi/CN-Gal4</i> | 111.8      | 86.63 to 137.0     | Yes          | ***     | <0.0001          |



## Extended Data Figure 4e-h

### Sample size

| Genotype                                                                       | Gender | Feeding status | Treatment      | Sample size (N)<br>(# of brains) | Sample size (n)<br>(# of cells) |
|--------------------------------------------------------------------------------|--------|----------------|----------------|----------------------------------|---------------------------------|
| <i>w<sup>-</sup>; UAS-GCaMP6s/+; CN-Gal4/+</i>                                 | M      | Fed            | 1 mM D-glucose | 6                                | 6                               |
| <i>w<sup>-</sup>; UAS-GCaMP6s/+; CN-Gal4/ UAS-Glut1-RNAi</i>                   | M      | Fed            | 1 mM D-glucose | 5                                | 5                               |
| <i>w<sup>-</sup>; UAS-GCaMP6s/+; CN-Gal4/ UAS-SUR1-RNAi</i>                    | M      | Fed            | 1 mM D-glucose | 4                                | 4                               |
| <i>w<sup>-</sup>; UAS-GCaMP6s/+; CN-Gal4/UAS-Ca-<math>\alpha</math>1D-RNAi</i> | M      | Fed            | 1 mM D-glucose | 4                                | 4                               |

### Statistics - One-way ANOVA with Tukey post hoc test

#### Extended Data Figure 4e - Peak amplitude

| Tukey's multiple comparisons test | Mean Diff. | 95.00% CI of diff. | Significant? | Summary | Adjusted P Value |
|-----------------------------------|------------|--------------------|--------------|---------|------------------|
| Cont vs. Glut1                    | 456.2      | 310.7 to 601.6     | Yes          | ***     | <0.0001          |
| Cont vs. SUR1                     | 460.5      | 305.4 to 615.5     | Yes          | ***     | <0.0001          |
| Cont vs. Ca $\alpha$ 1D           | 460.0      | 305.0 to 615.1     | Yes          | ***     | <0.0001          |
| Glut1 vs. SUR1                    | 4.293      | -156.8 to 165.4    | No           | ns      | 0.9998           |
| Glut1 vs. Ca $\alpha$ 1D          | 3.858      | -157.3 to 165.0    | No           | ns      | 0.9999           |
| SUR1 vs. Ca $\alpha$ 1D           | -0.4350    | -170.3 to 169.4    | No           | ns      | >0.9999          |

#### Extended Data Figure 4f- Oscillation number

| Tukey's multiple comparisons test | Mean Diff. | 95.00% CI of diff. | Significant? | Summary | Adjusted P Value |
|-----------------------------------|------------|--------------------|--------------|---------|------------------|
| Cont vs. Glut1                    | 6.033      | 1.743 to 10.32     | Yes          | **      | 0.0051           |
| Cont vs. SUR1                     | 5.833      | 1.260 to 10.41     | Yes          | *       | 0.0108           |
| Cont vs. Ca $\alpha$ 1D           | 6.333      | 1.760 to 10.91     | Yes          | **      | 0.0058           |
| Glut1 vs. SUR1                    | -0.2000    | -4.952 to 4.552    | No           | ns      | 0.9993           |
| Glut1 vs. Ca $\alpha$ 1D          | 0.3000     | -4.452 to 5.052    | No           | ns      | 0.9978           |
| SUR1 vs. Ca $\alpha$ 1D           | 0.5000     | -4.510 to 5.510    | No           | ns      | 0.9914           |

#### Extended Data Figure 4g - Duration

| Tukey's multiple comparisons test | Mean Diff. | 95.00% CI of diff. | Significant? | Summary | Adjusted P Value |
|-----------------------------------|------------|--------------------|--------------|---------|------------------|
| Cont vs. Glut1                    | 864.0      | 428.9 to 1299      | Yes          | ***     | 0.0002           |
| Cont vs. SUR1                     | 822.5      | 358.7 to 1286      | Yes          | ***     | 0.0007           |
| Cont vs. Ca $\alpha$ 1D           | 772.5      | 308.7 to 1236      | Yes          | **      | 0.0012           |
| Glut1 vs. SUR1                    | -41.50     | -523.5 to 440.5    | No           | ns      | 0.9944           |
| Glut1 vs. Ca $\alpha$ 1D          | -91.50     | -573.5 to 390.5    | No           | ns      | 0.9459           |
| SUR1 vs. Ca $\alpha$ 1D           | -50.00     | -558.0 to 458.0    | No           | ns      | 0.9917           |

### Extended Data Figure 4h - Oscillation frequency

| Tukey's multiple comparisons test | Mean Diff. | 95.00% CI of diff.  | Significant? | Summary | Adjusted P Value |
|-----------------------------------|------------|---------------------|--------------|---------|------------------|
| Cont vs. Glut1                    | -0.006513  | -0.02848 to 0.01545 | No           | ns      | 0.8276           |
| Cont vs. SUR1                     | 0.002529   | -0.02088 to 0.02594 | No           | ns      | 0.9891           |
| Cont vs. Caa1D                    | 0.0002994  | -0.02311 to 0.02371 | No           | ns      | >0.9999          |
| Glut1 vs. SUR1                    | 0.009043   | -0.01529 to 0.03337 | No           | ns      | 0.7116           |
| Glut1 vs. Caa1D                   | 0.006813   | -0.01752 to 0.03114 | No           | ns      | 0.8502           |
| SUR1 vs. Caa1D                    | -0.002230  | -0.02788 to 0.02342 | No           | ns      | 0.9942           |

### Extended Data Figure 4j

#### Sample size

| Genotype                                                                                         | Gender | Feeding status | Incubated Temperature (°C) | Sample size (N) (# of brains) | Sample size (n) (# of cells) |
|--------------------------------------------------------------------------------------------------|--------|----------------|----------------------------|-------------------------------|------------------------------|
| <i>w<sup>-</sup>; LexAop-CD8-GFP-2A-CD8-GFP/+; UAS-mLexA-VP16-NFAT, LexAop-rCD2-GFP/ CN-Gal4</i> | M      | Fed            | 23                         | 8                             | 8                            |
| <i>w<sup>-</sup>; LexAop-CD8-GFP-2A-CD8-GFP/+; UAS-mLexA-VP16-NFAT, LexAop-rCD2-GFP/ CN-Gal4</i> | M      | Starved        | 23                         | 7                             | 9                            |
| <i>w<sup>-</sup>; LexAop-CD8-GFP-2A-CD8-GFP/+; UAS-mLexA-VP16-NFAT, LexAop-rCD2-GFP/ CN-Gal4</i> | M      | Refed          | 23                         | 6                             | 8                            |

#### Statistics - One-way ANOVA with Tukey post hoc test

#### Relative GFP intensity: Cell body – Fed vs. Starved vs. Refed

| Tukey's multiple comparisons test | Mean Diff. | 95.00% CI of diff. | Significant? | Summary | Adjusted P Value |
|-----------------------------------|------------|--------------------|--------------|---------|------------------|
| Fed vs. Starved                   | 0.8945     | 0.03049 to 1.759   | Yes          | *       | 0.0415           |
| Fed vs. Refed                     | -0.009132  | -0.8982 to 0.8799  | No           | ns      | 0.9996           |
| Starved vs. Refed                 | -0.9036    | -1.768 to -0.03962 | Yes          | *       | 0.0393           |

### Extended Data Figure 5a

#### Sample size

| Genotype                                        | Gender | Feeding status | Incubated Temperature (°C) | Sample size (N) (# of brains) | Sample size (n) (# of cells) |
|-------------------------------------------------|--------|----------------|----------------------------|-------------------------------|------------------------------|
| <i>w<sup>-</sup>; Crz-Gal4/+; UAS-Syt-GFP/+</i> | M      | Fed            | 23                         | 10                            | 10                           |
| <i>w<sup>-</sup>; Crz-Gal4/+; UAS-Syt-GFP/+</i> | M      | Starved        | 23                         | 7                             | 7                            |
| <i>w<sup>-</sup>; Crz-Gal4/+; UAS-Syt-GFP/+</i> | M      | Refed          | 23                         | 11                            | 11                           |

### Statistics - One-way ANOVA with Tukey post hoc test

#### Relative intensity of Syt-GFP: Neurites to IPCs - Fed vs. Starved vs. Refed

| Tukey's multiple comparisons test | Mean Diff. | 95.00% CI of diff. | Significant? | Summary | Adjusted P Value |
|-----------------------------------|------------|--------------------|--------------|---------|------------------|
| Fed vs. Starved                   | 2.684      | 0.9643 to 4.404    | Yes          | **      | 0.0018           |
| Fed vs. Refed                     | 0.5297     | -0.9952 to 2.055   | No           | ns      | 0.6667           |
| Starved vs. Refed                 | -2.155     | -3.842 to -0.4671  | Yes          | *       | 0.0105           |

### Extended Data Figure 5b

#### Sample size

| Genotype                             | Gender | Feeding status | Incubated Temperature (°C) | Sample size (N) (# of animals) | Sample size (n) (# of CCs) |
|--------------------------------------|--------|----------------|----------------------------|--------------------------------|----------------------------|
| <i>w-; Crz-Gal4/+; UAS-Syt-GFP/+</i> | M      | Fed            | 23                         | 7                              | 7                          |
| <i>w-; Crz-Gal4/+; UAS-Syt-GFP/+</i> | M      | Starved        | 23                         | 6                              | 6                          |
| <i>w-; Crz-Gal4/+; UAS-Syt-GFP/+</i> | M      | Refed          | 23                         | 6                              | 6                          |

### Statistics - One-way ANOVA with Tukey post hoc test

#### Relative intensity of Syt-GFP: Neurites to CC – Fed vs. Starved vs. Refed

| Tukey's multiple comparisons test | Mean Diff. | 95.00% CI of diff. | Significant? | Summary | Adjusted P Value |
|-----------------------------------|------------|--------------------|--------------|---------|------------------|
| Fed vs. Starved                   | 5.470      | 2.484 to 8.455     | Yes          | ***     | 0.0006           |
| Fed vs. Refed                     | -0.05580   | -3.041 to 2.930    | No           | ns      | 0.9987           |
| Starved vs. Refed                 | -5.525     | -8.624 to -2.427   | Yes          | ***     | 0.0008           |

### Extended Data Figure 5c

#### Sample size

| Genotype                             | Gender | Feeding status | Incubated Temperature (°C) | Sample size (N) (# of animals) | Sample size (n) (# of CCs) |
|--------------------------------------|--------|----------------|----------------------------|--------------------------------|----------------------------|
| <i>w-; Crz-Gal4/+; UAS-Syt-GFP/+</i> | M      | Fed            | 23                         | 10                             | 10                         |
| <i>w-; Crz-Gal4/+; UAS-Syt-GFP/+</i> | M      | Starved        | 23                         | 7                              | 7                          |
| <i>w-; Crz-Gal4/+; UAS-Syt-GFP/+</i> | M      | Refed          | 23                         | 11                             | 11                         |

### Statistics - One-way ANOVA with Tukey post hoc test

#### Length of branch: Neurites to IPCs – Fed vs. Starved vs. Refed

| Tukey's multiple comparisons test | Mean Diff. | 95.00% CI of diff. | Significant? | Summary | Adjusted P Value |
|-----------------------------------|------------|--------------------|--------------|---------|------------------|
| Fed vs. Starved                   | 16.36      | -10.51 to 43.24    | No           | ns      | 0.3005           |
| Fed vs. Refed                     | -12.01     | -35.84 to 11.82    | No           | ns      | 0.4331           |
| Starved vs. Refed                 | -28.37     | -54.74 to -2.001   | Yes          | *       | 0.0332           |

## Extended Data Figure 5d

### Sample size

| Genotype                                        | Gender | Feeding status | Incubated Temperature (°C) | Sample size (N) (# of animals) | Sample size (n) (# of CCs) |
|-------------------------------------------------|--------|----------------|----------------------------|--------------------------------|----------------------------|
| <i>w<sup>-</sup>; Crz-Gal4/+; UAS-Syt-GFP/+</i> | M      | Fed            | 23                         | 7                              | 7                          |
| <i>w<sup>-</sup>; Crz-Gal4/+; UAS-Syt-GFP/+</i> | M      | Starved        | 23                         | 6                              | 6                          |
| <i>w<sup>-</sup>; Crz-Gal4/+; UAS-Syt-GFP/+</i> | M      | Refed          | 23                         | 6                              | 6                          |

### Statistics - One-way ANOVA with Tukey post hoc test

#### Length of branch: Neurites to CC – Fed vs. Starved vs. Refed

| Tukey's multiple comparisons test | Mean Diff. | 95.00% CI of diff. | Significant? | Summary | Adjusted P Value |
|-----------------------------------|------------|--------------------|--------------|---------|------------------|
| Fed vs. Starved                   | 137.8      | 71.72 to 203.9     | Yes          | ***     | <0.0001          |
| Fed vs. Refed                     | 30.47      | -28.13 to 89.07    | No           | ns      | 0.4110           |
| Starved vs. Refed                 | -107.3     | -172.2 to -42.50   | Yes          | **      | 0.0010           |

## Extended Data Figure 5f-h

### Sample size

| Genotype                                        | Gender | Feeding status | Incubated Temperature (°C) | Sample size (N) (# of animals) | Sample size (n) (# of CCs) |
|-------------------------------------------------|--------|----------------|----------------------------|--------------------------------|----------------------------|
| <i>w<sup>-</sup>; Crz-Gal4/+; UAS-Syt-GFP/+</i> | M      | Fed            | 23                         | 10                             | 10                         |
| <i>w<sup>-</sup>; Crz-Gal4/+; UAS-Syt-GFP/+</i> | M      | Starved        | 23                         | 7                              | 7                          |
| <i>w<sup>-</sup>; Crz-Gal4/+; UAS-Syt-GFP/+</i> | M      | Refed          | 23                         | 11                             | 11                         |

### Statistics - One-way ANOVA with Tukey post hoc test

#### Extended Data Figure 5f

#### Number of Syt+ puncta: Dorsal lateral area – Fed vs. Starved vs. Refed

| Tukey's multiple comparisons test | Mean Diff. | 95.00% CI of diff. | Significant? | Summary | Adjusted P Value |
|-----------------------------------|------------|--------------------|--------------|---------|------------------|
| Fed vs. Starved                   | 0.4857     | -5.561 to 6.532    | No           | ns      | 0.9782           |
| Fed vs. Refed                     | 3.018      | -2.343 to 8.379    | No           | ns      | 0.3550           |
| Starved vs. Refed                 | 2.532      | -3.400 to 8.465    | No           | ns      | 0.5451           |

#### Extended Data Figure 5g

#### Number of Syt+ puncta: Medial lateral area – Fed vs. Starved vs. Refed

| Tukey's multiple comparisons test | Mean Diff. | 95.00% CI of diff. | Significant? | Summary | Adjusted P Value |
|-----------------------------------|------------|--------------------|--------------|---------|------------------|
| Fed vs. Starved                   | 0.7143     | -12.90 to 14.32    | No           | ns      | 0.9906           |
| Fed vs. Refed                     | 2.000      | -10.07 to 14.07    | No           | ns      | 0.9107           |
| Starved vs. Refed                 | 1.286      | -12.07 to 14.64    | No           | ns      | 0.9688           |

## Extended Data Figure 5h

### Number of Syt+ puncta: SEZ – Fed vs. Starved vs. Refed

| Tukey's multiple comparisons test | Mean Diff. | 95.00% CI of diff. | Significant? | Summary | Adjusted P Value |
|-----------------------------------|------------|--------------------|--------------|---------|------------------|
| Fed vs. Starved                   | -0.1667    | -14.38 to 14.04    | No           | ns      | 0.9995           |
| Fed vs. Refed                     | 2.818      | -9.206 to 14.84    | No           | ns      | 0.8292           |
| Starved vs. Refed                 | 2.985      | -10.98 to 16.95    | No           | ns      | 0.8556           |

## Extended Data Figure 6b

### Sample size

| Experiments           | Genotype                                                         | Gender | Feeding status | Treatment  | Sample size (N) (# of brains) | Sample size (n) (# of cells) |
|-----------------------|------------------------------------------------------------------|--------|----------------|------------|-------------------------------|------------------------------|
| Negative Control      | <i>w-; UAS-GCaMP6s/+; CN-Gal4/+</i>                              | M      | Fed            | 2.5 mM ATP | 10                            | 10                           |
| Positive control-UAS  | <i>w-; UAS-GCaMP6s/+; CN-Gal4/ UAS-P2X<sub>2</sub></i>           | M      | Fed            | 2.5 mM ATP | 7                             | 7                            |
| Positive control-LexA | <i>w-; R20F11-LexA/ LexAop-GCaMP6s; LexAop-P2X<sub>2</sub>/+</i> | M      | Fed            | 2.5 mM ATP | 11                            | 11                           |

### Statistics - One-way ANOVA with Tukey post hoc test

| Tukey's multiple comparisons test                | Mean Diff. | 95.00% CI of diff. | Significant? | Summary | Adjusted P Value |
|--------------------------------------------------|------------|--------------------|--------------|---------|------------------|
| Negative Control vs. UAS-P2X <sub>2</sub>        | -400.9     | -562.9 to -238.9   | Yes          | ***     | <0.0001          |
| Negative Control vs. LexAop-P2 X <sub>2</sub>    | -354.3     | -527.7 to -180.9   | Yes          | ***     | 0.0003           |
| UAS-P2X <sub>2</sub> vs. LexAop-P2X <sub>2</sub> | 46.64      | -138.9 to 232.2    | No           | ns      | 0.7881           |

## Extended Data Figure 6c-f

### Sample size

| Experiments               | Genotype                                                               | Gender | Feeding status | Treatment  | Sample size (N) (# of brains) | Sample size (n) (# of cells) |
|---------------------------|------------------------------------------------------------------------|--------|----------------|------------|-------------------------------|------------------------------|
| Negative Control          | <i>w-; UAS-GCaMP6s/+; Dh44-Gal4/+</i>                                  | M      | Fed            | 2.5 mM ATP | 3                             | 3                            |
| Positive control          | <i>w-; UAS-GCaMP6s/ Dh44-LexA; Dh44-Gal4/ LexAop-P2X<sub>2</sub></i>   | M      | Fed            | 2.5 mM ATP | 4                             | 4                            |
| Experimental (Dh44 to CN) | <i>w-; UAS-GCaMP6s/ Crz-Gal4; Dh44-LexA/ LexAop-P2X<sub>2</sub></i>    | M      | Fed            | 2.5 mM ATP | 7                             | 7                            |
| Experimental (CN to Dh44) | <i>w-; UAS-GCaMP6s/ R20F11-LexA; Dh44-Gal4/ LexAop-P2X<sub>2</sub></i> | M      | Fed            | 2.5 mM ATP | 4                             | 16                           |

## Extended Data Figure 7f

### Sample size

| Genotype                                                          | Gender | Feeding status | Incubated Temperature (°C) | Sample size (N) (# of trials) | # of flies in each trial (n) |
|-------------------------------------------------------------------|--------|----------------|----------------------------|-------------------------------|------------------------------|
| <i>w-; +/+; UAS-Kir2.1, dilp2-HA-FLAG/ CN-Gal4, dilp2-HA-FLAG</i> | M      | Fed            | 23                         | 6                             | 60                           |
| <i>w-; +/+; UAS-Kir2.1, dilp2-HA-FLAG/ dilp2-HA-FLAG</i>          | M      | Fed            | 23                         | 6                             | 60                           |

### Statistics – Unpaired two-tailed t test

#### *UAS-Kir2.1/CN-Gal4; dilp2-HA vs. UAS-Kir2.1/+; dilp2-HA*

| Unpaired t test                        |                |
|----------------------------------------|----------------|
| P value                                | <0.0001        |
| P value summary                        | ***            |
| Significantly different (P < 0.05)?    | Yes            |
| One- or two-tailed P value?            | Two-tailed     |
| t, df                                  | t=9.792, df=10 |
| Mean of column A                       | 27.16          |
| Mean of column B                       | 47.26          |
| Difference between means (B - A) ± SEM | 20.10 ± 2.053  |
| 95% confidence interval                | 15.53 to 24.67 |
| R squared (eta squared)                | 0.9056         |

## Extended Data Figure 7h

### Sample size

| Genotype                           | Gender | Feeding status | Incubated Temperature (°C) | Sample size (N) (# of trials) | # of flies in each trial (n) |
|------------------------------------|--------|----------------|----------------------------|-------------------------------|------------------------------|
| <i>w-; +/+; CN-Gal4/+</i>          | M      | Fed            | 23                         | 3                             | 60                           |
| <i>w-; +/+; UAS-Kir2.1/+</i>       | M      | Fed            | 23                         | 9                             | 60                           |
| <i>w-; +/+; UAS-Kir2.1/CN-Gal4</i> | M      | Fed            | 23                         | 9                             | 60                           |

### Statistics - One-way ANOVA with Tukey post hoc test

| Tukey's multiple comparisons test          | Mean Diff. | 95.00% CI of diff. | Significant? | Summary | Adjusted P Value |
|--------------------------------------------|------------|--------------------|--------------|---------|------------------|
| <i>CN-Gal4/+ vs. UAS-Kir2.1/+</i>          | 2.558      | -25.43 to 30.54    | No           | ns      | 0.9705           |
| <i>CN-Gal4/+ vs. UAS-Kir2.1/CN-Gal4</i>    | -40.94     | -68.92 to -12.96   | Yes          | **      | 0.0041           |
| <i>UAS-Kir2.1/+ vs. UAS-Kir2.1/CN-Gal4</i> | -43.50     | -63.28 to -23.71   | Yes          | ***     | <0.0001          |

## Extended Data Figure 8c

### Sample size

| Experiments  | Genotype                                                    | Gender | Feeding status | treatment                 | Sample size (N) (# of brains) | Sample size (n) (# of cells) |
|--------------|-------------------------------------------------------------|--------|----------------|---------------------------|-------------------------------|------------------------------|
| Control      | <i>w-; R20F11-LexA/ UAS-GCaMP6s; dilp2-Gal4/ +</i>          | M      | Fed            | 100 $\mu$ M Glibenclamide | 5                             | 28                           |
| Experimental | <i>w-; R20F11-LexA/ UAS-GCaMP6s; dilp2-Gal4/ LexAop-TNT</i> | M      | Fed            | 100 $\mu$ M Glibenclamide | 9                             | 44                           |

### Statistics – Unpaired two-tailed t test

#### Max $\Delta F/F$ (%): Control vs. Experimental

| Unpaired t test                            |                    |
|--------------------------------------------|--------------------|
| P value                                    | <0.0001            |
| P value summary                            | ***                |
| Significantly different (P < 0.05)?        | Yes                |
| One- or two-tailed P value?                | Two-tailed         |
| t, df                                      | t=5.970, df=70     |
| Mean of column A                           | 280.4              |
| Mean of column B                           | 45.71              |
| Difference between means (B - A) $\pm$ SEM | -234.6 $\pm$ 39.30 |
| 95% confidence interval                    | -313.0 to -156.3   |
| R squared (eta squared)                    | 0.3374             |

## Extended Data Figure 9c

### Sample size

| Genotype                                  | Gender | Feeding status | Incubated Temperature ( $^{\circ}$ C) | Sample size (N) (# of trials) | # of flies in each trial (n)* |
|-------------------------------------------|--------|----------------|---------------------------------------|-------------------------------|-------------------------------|
| <i>w-; Crz-Gal4/+; +/+</i>                | M      | Fed            | 23                                    | 3                             | 28                            |
| <i>w-; UAS-Crz-RNAi(2)/+; +/+</i>         | M      | Fed            | 23                                    | 3                             | 38                            |
| <i>w-; Crz-Gal4/ UAS-Crz-RNAi(2); +/+</i> | M      | Fed            | 23                                    | 5                             | 36                            |
| <i>w-; +/+; UAS-Crz-RNAi(3)/+</i>         | M      | Fed            | 23                                    | 4                             | 30                            |
| <i>w-; Crz-Gal4/+; UAS-Crz-RNAi(3)/+</i>  | M      | Fed            | 23                                    | 5                             | 34                            |
| <i>w-; Crz-Gal4/+; +/+</i>                | M      | Starved        | 23                                    | 6                             | 32                            |
| <i>w-; UAS-Crz-RNAi(2)/+; +/+</i>         | M      | Starved        | 23                                    | 4                             | 36                            |
| <i>w-; Crz-Gal4/ UAS-Crz-RNAi(2); +/+</i> | M      | Starved        | 23                                    | 12                            | 48                            |
| <i>w-; +/+; UAS-Crz-RNAi(3)/+</i>         | M      | Starved        | 23                                    | 6                             | 34                            |
| <i>w-; Crz-Gal4/+; UAS-Crz-RNAi(3)/+</i>  | M      | Starved        | 23                                    | 4                             | 38                            |

\* The number of flies(n) stated in this table is the number of flies that was used in one of the all trials. For all the details, please check the raw data.

## Statistics - One-way ANOVA with Tukey post hoc test

### Group 1 (Fed, *Crz-Gal4 X UAS-Crz-RNAi(2)*)

| Tukey's multiple comparisons test             | Mean Diff. | 95.00% CI of diff. | Significant? | Summary | Adjusted P Value |
|-----------------------------------------------|------------|--------------------|--------------|---------|------------------|
| <i>Crz-Gal4/+ vs. Crz-RNAi(2)/+</i>           | 15.14      | -9.731 to 40.02    | No           | ns      | 0.2496           |
| <i>Crz-Gal4/+ vs. Crz-RNAi(2)/Crz-Gal4</i>    | 16.13      | -6.116 to 38.38    | No           | ns      | 0.1574           |
| <i>Crz-RNAi(2)/+ vs. Crz-RNAi(2)/Crz-Gal4</i> | 0.9885     | -21.26 to 23.24    | No           | ns      | 0.9912           |

### Group 2 (Starved, *Crz-Gal4 X UAS-Crz-RNAi(2)*)

| Tukey's multiple comparisons test             | Mean Diff. | 95.00% CI of diff. | Significant? | Summary | Adjusted P Value |
|-----------------------------------------------|------------|--------------------|--------------|---------|------------------|
| <i>Crz-Gal4/+ vs. Crz-RNAi(2)/+</i>           | 18.72      | -29.47 to 66.90    | No           | ns      | 0.5938           |
| <i>Crz-Gal4/+ vs. Crz-RNAi(2)/Crz-Gal4</i>    | 3.785      | -33.54 to 41.11    | No           | ns      | 0.9641           |
| <i>Crz-RNAi(2)/+ vs. Crz-RNAi(2)/Crz-Gal4</i> | -14.93     | -58.03 to 28.16    | No           | ns      | 0.6589           |

### Group 3 (Fed, *Crz-Gal4 X UAS-Crz-RNAi(3)*)

| Tukey's multiple comparisons test             | Mean Diff. | 95.00% CI of diff. | Significant? | Summary | Adjusted P Value |
|-----------------------------------------------|------------|--------------------|--------------|---------|------------------|
| <i>Crz-Gal4/+ vs. Crz-RNAi(3)/+</i>           | 30.01      | -15.24 to 75.26    | No           | ns      | 0.2080           |
| <i>Crz-Gal4/+ vs. Crz-RNAi(3)/Crz-Gal4</i>    | 8.101      | -35.17 to 51.37    | No           | ns      | 0.8624           |
| <i>Crz-RNAi(3)/+ vs. Crz-RNAi(3)/Crz-Gal4</i> | -21.91     | -61.66 to 17.83    | No           | ns      | 0.3191           |

### Group 4 (Starved, *Crz-Gal4 X UAS-Crz-RNAi(3)*)

| Tukey's multiple comparisons test             | Mean Diff. | 95.00% CI of diff. | Significant? | Summary | Adjusted P Value |
|-----------------------------------------------|------------|--------------------|--------------|---------|------------------|
| <i>Crz-Gal4/+ vs. Crz-RNAi(3)/+</i>           | 0.000      | -18.10 to 18.10    | No           | ns      | >0.9999          |
| <i>Crz-Gal4/+ vs. Crz-RNAi(3)/Crz-Gal4</i>    | -15.71     | -35.94 to 4.525    | No           | ns      | 0.1396           |
| <i>Crz-RNAi(3)/+ vs. Crz-RNAi(3)/Crz-Gal4</i> | -15.71     | -35.94 to 4.525    | No           | ns      | 0.1396           |

## Extended Data Figure 9d

### Sample size

| Genotype                                         | Gender | Feeding status | Incubated Temperature (°C) | Sample size (N) (# of trials) | # of flies in each trial (n)* |
|--------------------------------------------------|--------|----------------|----------------------------|-------------------------------|-------------------------------|
| <i>w-; CrzR-Gal4/+; +/+</i>                      | M      | Starved        | 23                         | 5                             | 42                            |
| <i>w-; CrzR-Gal4/+; UAS-CrzR-RNAi(44310GD)/+</i> | M      | Starved        | 23                         | 4                             | 33                            |
| <i>w-; CrzR-Gal4/ UAS-CrzR-RNAi(108506); +/+</i> | M      | Starved        | 23                         | 4                             | 42                            |
| <i>w-; CrzR-Gal4/+; UAS-CrzR-RNAi(46713GD)/+</i> | M      | Starved        | 23                         | 4                             | 41                            |

\* The number of flies(n) stated in this table is the number of flies that was used in one of the all trials. For all the details, please check the raw data.



## Statistics – Unpaired two-tailed t test

### *CrzR-Gal4/+ vs. UAS-CrzR-RNAi(44310GD)/ CrzR-Gal4*

---

#### Unpaired t test

---

|                                        |                 |
|----------------------------------------|-----------------|
| P value                                | 0.4259          |
| P value summary                        | ns              |
| Significantly different (P < 0.05)?    | No              |
| One- or two-tailed P value?            | Two-tailed      |
| t, df                                  | t=0.8453, df=7  |
| Mean of column A                       | 70.48           |
| Mean of column B                       | 78.59           |
| Difference between means (B - A) ± SEM | 8.116 ± 9.601   |
| 95% confidence interval                | -14.59 to 30.82 |
| R squared (eta squared)                | 0.09263         |

---

### *CrzR-Gal4/+ vs. UAS-CrzR-RNAi(108506)/ CrzR-Gal4*

---

#### Unpaired t test

---

|                                        |                    |
|----------------------------------------|--------------------|
| P value                                | 0.0500             |
| P value summary                        | ns                 |
| Significantly different (P < 0.05)?    | No                 |
| One- or two-tailed P value?            | Two-tailed         |
| t, df                                  | t=2.364, df=7      |
| Mean of column A                       | 70.48              |
| Mean of column C                       | 91.67              |
| Difference between means (C - A) ± SEM | 21.19 ± 8.962      |
| 95% confidence interval                | -0.004105 to 42.38 |
| R squared (eta squared)                | 0.4440             |

---

### *CrzR-Gal4/+ vs. UAS-CrzR-RNAi(46713GD)/ CrzR-Gal4*

---

#### Unpaired t test

---

|                                        |                 |
|----------------------------------------|-----------------|
| P value                                | 0.1299          |
| P value summary                        | ns              |
| Significantly different (P < 0.05)?    | No              |
| One- or two-tailed P value?            | Two-tailed      |
| t, df                                  | t=1.716, df=7   |
| Mean of column A                       | 70.48           |
| Mean of column D                       | 87.44           |
| Difference between means (D - A) ± SEM | 16.96 ± 9.884   |
| 95% confidence interval                | -6.411 to 40.33 |
| R squared (eta squared)                | 0.2961          |

---

## Extended Data Figure 9e

### Sample size

| Genotype                                         | Gender | Feeding status | 30 min incubation                 | Sample size (N) (# of brains) | Sample size (n) (# of cells) |
|--------------------------------------------------|--------|----------------|-----------------------------------|-------------------------------|------------------------------|
| <i>w<sup>-</sup>; Crz-Gal4/UAS-mCD8:GFP; +/+</i> | M      | 18 hr Starved  | 80 mM sucrose                     | 4                             | 4                            |
| <i>w<sup>-</sup>; Crz-Gal4/UAS-mCD8:GFP; +/+</i> | M      | 18 hr Starved  | 80 mM D-glucose                   | 5                             | 5                            |
| <i>w<sup>-</sup>; Crz-Gal4/UAS-mCD8:GFP; +/+</i> | M      | 18 hr Starved  | 80 mM D-glucose + 0.5 $\mu$ M TTX | 7                             | 7                            |
| <i>w<sup>-</sup>; Crz-Gal4/UAS-mCD8:GFP; +/+</i> | M      | 18 hr Starved  | 80 mM L-glucose                   | 6                             | 6                            |

### Statistics - One-way ANOVA with Tukey post hoc test

| Tukey's multiple comparisons test | Mean Diff. | 95.00% CI of diff. | Significant? | Summary | Adjusted P Value |
|-----------------------------------|------------|--------------------|--------------|---------|------------------|
| AHL vs. D-Glc                     | -0.07431   | -0.4422 to 0.2936  | No           | ns      | 0.9395           |
| AHL vs. D-Glc/TTX                 | -0.07488   | -0.4186 to 0.2688  | No           | ns      | 0.9257           |
| AHL vs. L-Glc                     | -0.06021   | -0.4142 to 0.2938  | No           | ns      | 0.9624           |
| D-Glc vs. D-Glc/TTX               | -0.0005688 | -0.3217 to 0.3205  | No           | ns      | >0.9999          |
| D-Glc vs. L-Glc                   | 0.01411    | -0.3180 to 0.3462  | No           | ns      | 0.9994           |
| D-Glc/TTX vs. L-Glc               | 0.01467    | -0.2904 to 0.3198  | No           | ns      | 0.9991           |

## Extended Data Figure 10b

### Sample size

| Experiments  | Genotype                                          | Gender | Feeding status | treatment       | Sample size (N) (# of brains) | Sample size (n) (# of cells) |
|--------------|---------------------------------------------------|--------|----------------|-----------------|-------------------------------|------------------------------|
| Control      | <i>w<sup>-</sup>; UAS-GCaMP6s/+; dilp2-Gal4/+</i> | M      | Fed            | DMSO only       | 5                             | 27                           |
| Experimental | <i>w<sup>-</sup>; UAS-GCaMP6s/+; dilp2-Gal4/+</i> | M      | Fed            | 80 $\mu$ M sNPF | 8                             | 31                           |

### Statistics – Unpaired two-tailed t test

#### Max $\Delta$ F/F (%): Control (DMSO) vs. sNPF

| Unpaired t test                            |                   |
|--------------------------------------------|-------------------|
| P value                                    | <0.0001           |
| P value summary                            | ***               |
| Significantly different (P < 0.05)?        | Yes               |
| One- or two-tailed P value?                | Two-tailed        |
| t, df                                      | t=5.502, df=56    |
| Mean of column A                           | -1.817            |
| Mean of column B                           | 93.70             |
| Difference between means (B - A) $\pm$ SEM | 95.51 $\pm$ 17.36 |
| 95% confidence interval                    | 60.74 to 130.3    |
| R squared (eta squared)                    | 0.3509            |

## Extended Data Figure 10c

### Sample size

| Genotype                                      | Gender | Feeding status | Incubated Temperature (°C) | Sample size (N) (# of trials) | # of flies in each trial (n) |
|-----------------------------------------------|--------|----------------|----------------------------|-------------------------------|------------------------------|
| <i>w<sup>-</sup>; +/+; CN-Gal4/+</i>          | M      | Fed            | 23                         | 14                            | 30                           |
| <i>w<sup>-</sup>; +/+; UAS-Kir2.1/+</i>       | M      | Fed            | 23                         | 12                            | 30                           |
| <i>w<sup>-</sup>; +/+; UAS-Kir2.1/CN-Gal4</i> | M      | Fed            | 23                         | 7                             | 30                           |
| <i>w<sup>-</sup>; +/+; CN-Gal4/+</i>          | M      | Starved        | 23                         | 6                             | 30                           |
| <i>w<sup>-</sup>; +/+; UAS-Kir2.1/+</i>       | M      | Starved        | 23                         | 6                             | 30                           |
| <i>w<sup>-</sup>; +/+; UAS-Kir2.1/CN-Gal4</i> | M      | Starved        | 23                         | 7                             | 30                           |

### Statistics - One-way ANOVA with Tukey post hoc test

#### Group 1 (Fed, *CN-Gal4* X *UAS-Kir2.1*)

| Tukey's multiple comparisons test                 | Mean Diff. | 95.00% CI of diff. | Significant? | Summary | Adjusted P Value |
|---------------------------------------------------|------------|--------------------|--------------|---------|------------------|
| <i>CN-Gal4/+</i> vs. <i>UAS-Kir2.1/+</i>          | 1.741      | -5.214 to 8.696    | No           | ns      | 0.8120           |
| <i>CN-Gal4/+</i> vs. <i>UAS-Kir2.1/CN-Gal4</i>    | -10.65     | -18.84 to -2.470   | Yes          | **      | 0.0086           |
| <i>UAS-Kir2.1/+</i> vs. <i>UAS-Kir2.1/CN-Gal4</i> | -12.39     | -20.80 to -3.987   | Yes          | **      | 0.0029           |

#### Group 2 (Starved, *CN-Gal4* X *UAS-Kir2.1*)

| Tukey's multiple comparisons test                 | Mean Diff. | 95.00% CI of diff. | Significant? | Summary | Adjusted P Value |
|---------------------------------------------------|------------|--------------------|--------------|---------|------------------|
| <i>CN-Gal4/+</i> vs. <i>UAS-Kir2.1/+</i>          | 3.508      | -4.121 to 11.14    | No           | ns      | 0.4777           |
| <i>CN-Gal4/+</i> vs. <i>UAS-Kir2.1/CN-Gal4</i>    | -7.859     | -15.21 to -0.5076  | Yes          | *       | 0.0353           |
| <i>UAS-Kir2.1/+</i> vs. <i>UAS-Kir2.1/CN-Gal4</i> | -11.37     | -18.72 to -4.016   | Yes          | **      | 0.0029           |

## Supplementary Table 2

Fly lines that were used in this study.

| Drosophila strains                                                         | Source                                     | Identifier |
|----------------------------------------------------------------------------|--------------------------------------------|------------|
| w <sup>1118</sup>                                                          | Bloomington <i>Drosophila</i> stock center | BL6326     |
| VT58471-Gal4 (VT058471)                                                    | Vienna <i>Drosophila</i> Resource Center   | 201682     |
| VT43147-Gal4 (VT043147)                                                    | Vienna <i>Drosophila</i> Resource Center   | 203711     |
| VT19059-Gal4 (VT019059)                                                    | Vienna <i>Drosophila</i> Resource Center   | 50816      |
| VT44330-Gal4 (VT044330)                                                    | Vienna <i>Drosophila</i> Resource Center   | 204632     |
| VT61919-Gal4 (VT061919)                                                    | Vienna <i>Drosophila</i> Resource Center   | 205399     |
| VT30597-Gal4 (VT030587)                                                    | Vienna <i>Drosophila</i> Resource Center   | 202274     |
| VT60736-Gal4 (VT060736)                                                    | Vienna <i>Drosophila</i> Resource Center   | 202781     |
| VT42831-Gal4 (VT042831)                                                    | Vienna <i>Drosophila</i> Resource Center   | 205009     |
| VT6394-Gal4 (VT006394)                                                     | Vienna <i>Drosophila</i> Resource Center   | 201211     |
| VT28326-Gal4 (VT028326)                                                    | Vienna <i>Drosophila</i> Resource Center   | 204776     |
| VT20739-Gal4 (VT020739)                                                    | Vienna <i>Drosophila</i> Resource Center   | 204908     |
| VT43145-Gal4 (VT043145)                                                    | Vienna <i>Drosophila</i> Resource Center   | 204212     |
| VT55827-Gal4 (VT055827)                                                    | Vienna <i>Drosophila</i> Resource Center   | 200416     |
| VT22112-Gal4 (VT022112)                                                    | Vienna <i>Drosophila</i> Resource Center   | 201255     |
| VT26149-Gal4 (VT026149)                                                    | Vienna <i>Drosophila</i> Resource Center   | 204563     |
| VT6395-Gal4 (VT006395)                                                     | Vienna <i>Drosophila</i> Resource Center   | 215038     |
| VT0465-Gal4 (VT00465)                                                      | Vienna <i>Drosophila</i> Resource Center   | 203732     |
| Crz-Gal4                                                                   | Lee et al.,2008                            | N/A        |
| UAS-Kir2.1                                                                 | Bloomington <i>Drosophila</i> stock center | BL6595     |
| Tub-Gal80 <sup>ts</sup>                                                    | Bloomington <i>Drosophila</i> stock center | BL7018     |
| Cha-Gal80 (ChAT-Gal80)                                                     | Kimamoto,2002                              | N/A        |
| UAS-mCD8:GFP                                                               | Bloomington <i>Drosophila</i> stock center | BL32186    |
| UAS-Denmark, UAS-Syt-eGFP                                                  | Bloomington <i>Drosophila</i> stock center | BL33065    |
| R20F11-LexA                                                                | Bloomington <i>Drosophila</i> stock center | BL52569    |
| LexAop-FLP                                                                 | Shang et al.,2008                          | N/A        |
| UAS-FRT-stop-FRT-smGFP                                                     | Nern et al.,2015                           | N/A        |
| UAS-FRT-stop-FRT-activeTNT                                                 | von Philipsborn et al.,2011                | N/A        |
| LexAop-GFP (LexAop-rCD2-GFP)                                               | Bloomington <i>Drosophila</i> stock center | BL66687    |
| LexAop-TNT (13XLexAop-IVS-TNT:HA)                                          | Karuppudurai et al.,2014                   | N/A        |
| UAS-GCaMP6s (20XUAS-IVS-GCaMP6s)                                           | Bloomington <i>Drosophila</i> stock center | BL42746    |
| CalexA (LexAop-CD2::GFP; UAS-mLexA-VP16-NFAT, LexAop-CD8::GFP-2A-CD8::GFP) | Masuyama et al.,2012                       | N/A        |
| UAS-nurexin-GFP1-10                                                        | Chen et al.,2014                           | N/A        |
| UAS-Hex-C-RNAi(3)                                                          | Bloomington <i>Drosophila</i> stock center | BL35338    |
| UAS-Hex-T2-RNAi(3)                                                         | Bloomington <i>Drosophila</i> stock center | BL47331    |
| UAS-Hex-A-RNAi(3)                                                          | Bloomington <i>Drosophila</i> stock center | BL35155    |
| UAS-SUR1-RNAi(2)                                                           | Bloomington <i>Drosophila</i> stock center | BL62746    |
| UAS-SUR1-RNAi(3)                                                           | Bloomington <i>Drosophila</i> stock center | BL36087    |
| UAS-Ca- $\alpha$ 1D-RNAi(3)                                                | Bloomington <i>Drosophila</i> stock center | BL33413    |
| UAS-Glut1-RNAi(3)                                                          | Bloomington <i>Drosophila</i> stock center | BL28645    |
| UAS-Glut4EF-RNAi(3)                                                        | Bloomington <i>Drosophila</i> stock center | BL57461    |
| UAS-sut1-RNAi(2)                                                           | Bloomington <i>Drosophila</i> stock center | BL65964    |
| UAS-sut2-RNAi(2)                                                           | Bloomington <i>Drosophila</i> stock center | BL64861    |
| UAS-slv-RNAi(3)                                                            | Bloomington <i>Drosophila</i> stock center | BL29388    |
| UAS-smvt-RNAi(2)                                                           | Bloomington <i>Drosophila</i> stock center | BL63568    |
| LexAop-CD4-GFP11                                                           | Chen et al.,2014                           | N/A        |
| UAS-P2X <sub>2</sub>                                                       | Lima and Miesenbock,2005                   | N/A        |
| LexAop-P2X <sub>2</sub>                                                    | Bloomington <i>Drosophila</i> stock center | BL76030    |
| dilp2-Gal4 (llp-Gal4.R)                                                    | Bloomington <i>Drosophila</i> stock center | BL37516    |
| dilp2-lexA                                                                 | Li et al.,2015                             | N/A        |
| LexAop-GCaMP6s (13XLexAop-IVS-GCaMP6s-p10)                                 | Bloomington <i>Drosophila</i> stock center | BL44590    |
| UAS-Syt-GFP (UAS-IVS-Syn21-GFP-p10)                                        | Pfeiffer et al.,2012                       | N/A        |
| Dh44-Gal4                                                                  | Dus et al.,2015                            | N/A        |
| Dh44-LexA                                                                  | Dus et al.,2015                            | N/A        |
| dilp2-HA-FLAG knock-in                                                     | Park et al.,2015                           | N/A        |
| LexAop-syb-GFP1-10                                                         | Macpherson, L. J. et al.,2015              | N/A        |
| UAS-CD4-GFP11                                                              | Macpherson, L. J. et al.,2015              | N/A        |
| AKH-Gal4 (AKH-Gal4.L)                                                      | Bloomington <i>Drosophila</i> stock center | BL25684    |
| UAS-Arflight                                                               | Cao, G. et al.,2016                        | N/A        |
| UAS-sNPF-RNAi(2)                                                           | Lee et al.,2004                            | N/A        |
| UAS-sNPF-RNAi(3)                                                           | Bloomington <i>Drosophila</i> stock center | BL25867    |
| UAS-sNPF-RN (dominant negative)                                            | Lee et al.,2008                            | N/A        |
| CrzR(receptor)-Gal4                                                        | Tayler et al.,2012                         | N/A        |
| UAS-Crz-RNAi(GD)                                                           | Vienna <i>Drosophila</i> Resource Center   | 30670      |
| UAS-Crz-RNAi(KK)                                                           | Vienna <i>Drosophila</i> Resource Center   | 106876     |
| UAS-CrzR-RNAi (44310GD)                                                    | Vienna <i>Drosophila</i> Resource Center   | 44310      |
| UAS-CrzR-RNAi (108506)                                                     | Vienna <i>Drosophila</i> Resource Center   | 108506     |
| UAS-CrzR-RNAi (46713GD)                                                    | Vienna <i>Drosophila</i> Resource Center   | 46713      |

# Supplementary Table 3

Quantitative value (Top 3 precursor intensity) of peptide intensity in hemolymph of the control (*UAS-Kir2.1/+*) and experimental (*UAS-Kir2.1/ CN-Gal4*) flies.

## Trial 1

| Identified Proteins (226)                                                                            | Accession Number  | Alternate ID | Molecular Weight | Control Trial1 | Exp - Trial 1 |
|------------------------------------------------------------------------------------------------------|-------------------|--------------|------------------|----------------|---------------|
| Neuropeptide-like 2 OS=Drosophila melanogaster GN=Nplp2 PE=1 SV=1                                    | NPLP2_DROME       | Nplp2        | 9 kDa            | 5.57E+09       | 5.85E+09      |
| CG16712, isoform B OS=Drosophila melanogaster GN=CG16712 PE=2 SV=1                                   | Q9VQT8_DROME      | CG16712      | 9 kDa            | 2.00E+09       | 2.26E+08      |
| Accessory gland-specific peptide 57Da OS=Drosophila melanogaster GN=Mst57Da PE=2 SV=1                | MS57A_DROME       | Mst57Da      | 7 kDa            | 1.65E+09       | 3.30E+07      |
| Odorant-binding protein 99c OS=Drosophila melanogaster GN=Obp99c PE=2 SV=1                           | Q9VAI9_DROME      | Obp99c       | 17 kDa           | 8.85E+08       | 3.46E+08      |
| RT02906p OS=Drosophila melanogaster GN=Sfp79B PE=2 SV=1                                              | B4ZJA5_DROME      | Sfp79B       | 4 kDa            | 8.78E+08       | 1.76E+07      |
| CG5804-PA OS=Drosophila melanogaster GN=CG5804 PE=2 SV=1                                             | Q9VSP9_DROME      | CG5804       | 9 kDa            | 2.55E+08       | 6.15E+07      |
| CG4944-PA, isoform A OS=Drosophila melanogaster GN=cib PE=1 SV=1                                     | O97428_DROME      | cib          | 14 kDa           | 2.41E+08       | 5.93E+07      |
| RH08789p OS=Drosophila melanogaster GN=ssp7 PE=2 SV=1                                                | Q8IR95_DROME      | ssp7         | 10 kDa           | 1.94E+08       | 1.62E+08      |
| Drosomycin OS=Drosophila melanogaster GN=Drs PE=1 SV=1                                               | DMYC_DROME        | Drs          | 8 kDa            | 1.41E+08       | 5.79E+07      |
| General odorant-binding protein 99a OS=Drosophila melanogaster GN=Obp99a PE=1 SV=2                   | OB99A_DROME       | Obp99a       | 16 kDa           | 7.52E+07       | 2.42E+07      |
| Protein bangles and beads OS=Drosophila melanogaster GN=bnb PE=1 SV=1                                | BNB_DROME         | bnb          | 46 kDa           | 5.71E+07       | 9.08E+07      |
| CG1648, isoform B OS=Drosophila melanogaster GN=CG1648 PE=4 SV=1                                     | A1Z7Z4_DROME (+1) | CG1648       | 24 kDa           | 5.32E+07       | 4.28E+08      |
| 12 kDa FK506-binding protein OS=Drosophila melanogaster GN=FK506-bp2 PE=3 SV=2                       | FKB12_DROME       | FK506-bp2    | 12 kDa           | 4.46E+07       | 5.13E+07      |
| LD45324p OS=Drosophila melanogaster GN=Prx5 PE=2 SV=1                                                | Q960M4_DROME      | Prx5         | 20 kDa           | 3.79E+07       | 1.16E+08      |
| General odorant-binding protein 56a OS=Drosophila melanogaster GN=Obp56a PE=1 SV=1                   | OB56A_DROME       | Obp56a       | 15 kDa           | 3.70E+07       | 4.87E+08      |
| Protein Turandot A OS=Drosophila melanogaster GN=TotA PE=1 SV=1                                      | TOTA_DROME        | TotA         | 14 kDa           | 3.63E+07       | 1.22E+08      |
| Drosomycin-like 5 OS=Drosophila melanogaster GN=DrsI5 PE=2 SV=1                                      | Q9VZR2_DROME      | DrsI5        | 8 kDa            | 3.60E+07       | 2.25E+07      |
| CG34215 OS=Drosophila melanogaster GN=CG34215 PE=4 SV=1                                              | A8DY49_DROME      | CG34215      | 11 kDa           | 2.92E+07       | 4.93E+08      |
| Immune-induced peptides OS=Drosophila melanogaster GN=IM10 PE=1 SV=2                                 | IM10_DROME        | IM10         | 29 kDa           | 2.49E+07       | 4.65E+07      |
| Ductus ejaculatorius peptide 99B OS=Drosophila melanogaster GN=Dup99B PE=1 SV=2                      | DEJP_DROME        | Dup99B       | 6 kDa            | 2.43E+07       | 4.35E+07      |
| Probable elongation factor 1-beta OS=Drosophila melanogaster GN=Ef1beta PE=1 SV=3                    | EF1B_DROME        | Ef1beta      | 24 kDa           | 1.70E+07       | 1.59E+07      |
| Crammer OS=Drosophila melanogaster GN=cer PE=1 SV=1                                                  | A1ZBK7_DROME      | cer          | 9 kDa            | 1.42E+07       | 6.64E+07      |
| Accessory gland-specific peptide 26Aa OS=Drosophila melanogaster GN=Acp26Aa PE=2 SV=2                | MS2A_DROME        | Acp26Aa      | 30 kDa           | 1.25E+07       | 2.54E+07      |
| CG30395 OS=Drosophila melanogaster GN=CG30395 PE=4 SV=2                                              | Q8MLV0_DROME      | CG30395      | 98 kDa           | 1.09E+07       | 5.39E+07      |
| Niemann-Pick type C-2g OS=Drosophila melanogaster GN=Npc2g PE=4 SV=1                                 | Q9VA42_DROME      | Npc2g        | 17 kDa           | 9897700        | 4.16E+07      |
| CG2862, isoform B OS=Drosophila melanogaster GN=CG2862 PE=4 SV=1                                     | Q86BQ4_DROME (+1) | CG2862       | 14 kDa           | 8433100        | 2568100       |
| CG15067, isoform A OS=Drosophila melanogaster GN=CG15067 PE=4 SV=1                                   | A1ZB61_DROME      | CG15067      | 16 kDa           | 8212300        | 4.78E+07      |
| Accessory gland protein Acp36DE OS=Drosophila melanogaster GN=Acp36DE PE=2 SV=1                      | A36DE_DROME       | Acp36DE      | 102 kDa          | 7758200        | 1.42E+07      |
| Jonah 44E OS=Drosophila melanogaster GN=Jon44E PE=2 SV=1                                             | Q7JX43_DROME (+6) | Jon44E       | 30 kDa           | 6730100        | 5517100       |
| Eukaryotic translation initiation factor 4G, isoform B OS=Drosophila melanogaster GN=eIF4G PE=4 SV=1 | A8DZ29_DROME (+1) | eIF4G        | 211 kDa          | 6085200        | 2358600       |
| CG13023, isoform A OS=Drosophila melanogaster GN=CG13023 PE=4 SV=1                                   | Q9VVC0_DROME      | CG13023      | 45 kDa           | 5827000        | 8082400       |
| Obp44a OS=Drosophila melanogaster GN=Obp44a PE=2 SV=1                                                | Q7K084_DROME      | Obp44a       | 16 kDa           | 5182900        | 3.37E+07      |
| CG18594 OS=Drosophila melanogaster GN=Pebp1 PE=2 SV=1                                                | Q9VD01_DROME      | Pebp1        | 20 kDa           | 5054400        | 8933800       |
| CG31872, isoform A OS=Drosophila melanogaster GN=CG17093 PE=2 SV=2                                   | Q9VKT1_DROME      | CG17093      | 119 kDa          | 4836500        | 1564200       |
| Ejaculatory bulb-specific protein 3 OS=Drosophila melanogaster GN=PebIII PE=1 SV=2                   | PEB3_DROME        | PebIII       | 15 kDa           | 4505000        | 1.41E+07      |
| CG15369, isoform B OS=Drosophila melanogaster GN=CG15369 PE=4 SV=1                                   | Q9W370_DROME      | CG15369      | 13 kDa           | 3566400        | 1.38E+07      |
| BG642312, isoform A OS=Drosophila melanogaster GN=BG642312 PE=2 SV=1                                 | Q0E8H8_DROME      | BG642312     | 9 kDa            | 3248800        | 2.59E+08      |
| Accessory gland protein Acp63F OS=Drosophila melanogaster GN=Acp63F PE=2 SV=2                        | A63F_DROME        | Acp63F       | 9 kDa            | 3059300        | 5187700       |
| Sarcoplasmic calcium binding protein 1                                                               | Q8MSI2            | Scp1         | 21kDa            | 2925300        | 3.06E+08      |
| CG15635 OS=Drosophila melanogaster GN=CG15635 PE=4 SV=4                                              | Q9VLR13_DROME     | CG15635      | 115 kDa          | 2481000        | 1.05E+08      |
| Ribosomal protein S10b, isoform D OS=Drosophila melanogaster GN=RpS10b PE=4 SV=1                     | M9NEQ9_DROME (+1) | RpS10b       | 18 kDa           | 2213900        | 6.42E+07      |
| Fat-body protein 1 OS=Drosophila melanogaster GN=Fbp1 PE=2 SV=2                                      | FBP1_DROME (+1)   | Fbp1         | 120 kDa          | 2031100        | 5636700       |
| CG15201 OS=Drosophila melanogaster GN=CG15201 PE=2 SV=1                                              | Q9VZ24_DROME      | CG15201      | 13 kDa           | 1914900        | 3183100       |
| Fondue, isoform D OS=Drosophila melanogaster GN=fon PE=4 SV=1                                        | M9PDP3_DROME (+2) | fon          | 58 kDa           | 1824500        | 4504100       |
| NEDD8 OS=Drosophila melanogaster GN=Nedd8 PE=1 SV=1                                                  | NEDD8_DROME       | Nedd8        | 9 kDa            | 1742500        | 3338000       |
| CG9928, isoform B OS=Drosophila melanogaster GN=CG9928-RA PE=2 SV=1                                  | Q9VK39_DROME      | CG9928-RA    | 11 kDa           | 1476000        | 5.65E+07      |
| Triosephosphate isomerase OS=Drosophila melanogaster GN=Tpi PE=1 SV=3                                | TPIS_DROME        | Tpi          | 27 kDa           | 1118600        | 1.05E+07      |
| CG9691, isoform B OS=Drosophila melanogaster GN=CG9691 PE=2 SV=1                                     | Q9W306_DROME      | CG9691       | 13 kDa           | 901760         | 2.65E+07      |

|                                                                                                     |                                  |            |         |                 |                 |
|-----------------------------------------------------------------------------------------------------|----------------------------------|------------|---------|-----------------|-----------------|
| Ran, isoform B OS=Drosophila melanogaster GN=Ran PE=4 SV=1                                          | A4V4A5_DROME (+1)                | Ran        | 25 kDa  | 793740          | 4721400         |
| CG15293, isoform A OS=Drosophila melanogaster GN=CG15293 PE=4 SV=1                                  | Q9V3Y7_DROME                     | CG15293    | 37 kDa  | 751880          | 2.71E+07        |
| Fructose-bisphosphate aldolase OS=Drosophila melanogaster GN=Ald PE=2 SV=1                          | A4V3G1_DROME (+1)                | Ald        | 40 kDa  | 694770          | 4.58E+07        |
| CG3982-PA OS=Drosophila melanogaster GN=CG3982 PE=4 SV=2                                            | Q9VSY3_DROME                     | CG3982     | 37 kDa  | 665920          | 1.21E+07        |
| Aldose 1-epimerase OS=Drosophila melanogaster GN=CG10467-RA PE=2 SV=1                               | Q9VRU1_DROME                     | CG10467-RA | 40 kDa  | 581540          | 6818700         |
| CG2720-PA OS=Drosophila melanogaster GN=Hop PE=2 SV=1                                               | Q9VFN5_DROME                     | Hop        | 56 kDa  | 436770          | 6351100         |
| CG16885 OS=Drosophila melanogaster GN=CG16885 PE=2 SV=1                                             | Q8SZM2_DROME                     | CG16885    | 29 kDa  | 198680          | 1591600         |
| CG11395 OS=Drosophila melanogaster GN=CG11395 PE=2 SV=1                                             | Q7K533_DROME                     | CG11395    | 49 kDa  | 162220          | 5.45E+07        |
| GH08696p OS=Drosophila melanogaster GN=wupA PE=2 SV=1                                               | A4V4Q6_DROME (+2)                | wupA       | 25 kDa  | 0               | 3.38E+08        |
| Enolase, isoform F OS=Drosophila melanogaster GN=Eno PE=3 SV=1                                      | E1JHR5_DROME (+1)                | Eno        | 47 kDa  | 0               | 1.68E+08        |
| Myosin heavy chain, non-muscle OS=Drosophila melanogaster GN=zip PE=1 SV=2                          | MYSN_DROME (+2)                  | zip        | 237 kDa | 0               | 1.54E+08        |
| CG11400 OS=Drosophila melanogaster GN=CG11400 PE=2 SV=1                                             | Q7JV39_DROME                     | CG11400    | 22 kDa  | 0               | 1.05E+08        |
| CG17919 OS=Drosophila melanogaster GN=CG17919 PE=2 SV=1                                             | Q9VI09_DROME                     | CG17919    | 23 kDa  | 0               | 5.55E+07        |
| Anon1A4 OS=Drosophila melanogaster GN=Df31 PE=2 SV=1                                                | O16043_DROME                     | Df31       | 19 kDa  | 0               | 4.22E+07        |
| Poly(U)-specific endoribonuclease homolog OS=Drosophila melanogaster GN=CG2145 PE=1 SV=1            | ENDOU_DROME                      | CG2145     | 64 kDa  | 0               | 3.05E+07        |
| CG6409, isoform B OS=Drosophila melanogaster GN=CG6409 PE=2 SV=2                                    | Q9VTC3_DROME                     | CG6409     | 40 kDa  | 0               | 2.74E+07        |
| Alpha-amylase A OS=Drosophila melanogaster GN=Amy-p PE=2 SV=1                                       | AMYA_DROME (+1)                  | Amy-p      | 54 kDa  | 0               | 2.63E+07        |
| CON_ENSEMBL:ENSP00000377550                                                                         | CON_ENSEMBL:ENSP00000377550 (+5) |            | ?       | 0               | 2.44E+07        |
| Probable isoaspartyl peptidase/L-asparaginase CG7860 OS=Drosophila melanogaster GN=CG7860 PE=1 SV=1 | ASGL1_DROME                      | CG7860     | 35 kDa  | 0               | 2.43E+07        |
| CG31883 OS=Drosophila melanogaster GN=CG31883 PE=4 SV=1                                             | Q9VNB4_DROME                     | CG31883    | 33 kDa  | 0               | 2.31E+07        |
| Ypsilon schachtel, isoform B OS=Drosophila melanogaster GN=yps PE=4 SV=1                            | M9NFR5_DROME (+1)                | yps        | 37 kDa  | 0               | 2.11E+07        |
| Superoxide dismutase [Cu-Zn] OS=Drosophila melanogaster GN=Sod PE=3 SV=1                            | M9PF91_DROME (+1)                | Sod        | 17 kDa  | 0               | 1.83E+07        |
| Calmodulin OS=Drosophila melanogaster GN=Cam PE=1 SV=2                                              | CALM_DROME                       | Cam        | 17 kDa  | 0               | 1.65E+07        |
| CG16713-PA OS=Drosophila melanogaster GN=CG16713-RA PE=2 SV=1                                       | Q9VQT7_DROME                     | CG16713-RA | 9 kDa   | 0               | 1.55E+07        |
| ATP synthase subunit d, mitochondrial OS=Drosophila melanogaster GN=ATPsyn-d PE=2 SV=2              | ATP5H_DROME                      | ATPsyn-d   | 20 kDa  | 0               | 1.21E+07        |
| CG9119 OS=Drosophila melanogaster GN=CG9119 PE=2 SV=1                                               | Q9W0J9_DROME                     | CG9119     | 36 kDa  | 0               | 9529000         |
| Sh3beta, isoform E OS=Drosophila melanogaster GN=Sh3beta PE=4 SV=1                                  | M9MRQ6_DROME (+3)                | Sh3beta    | 54 kDa  | 0               | 7870800         |
| CG18179 OS=Drosophila melanogaster GN=CG18179 PE=2 SV=1                                             | Q9VT24_DROME (+1)                | CG18179    | 29 kDa  | 0               | 7232900         |
| Cytochrome b5 OS=Drosophila melanogaster GN=Cyt-b5 PE=2 SV=1                                        | CYB5_DROME                       | Cyt-b5     | 15 kDa  | 0               | 6953400         |
| Fl21560p1 OS=Drosophila melanogaster GN=wdp PE=2 SV=1                                               | Q9W266_DROME                     | wdp        | 75 kDa  | 0               | 6199700         |
| CG3777, isoform A OS=Drosophila melanogaster GN=EG:125H10.1 PE=2 SV=2                               | O76874_DROME                     | EG         | 94 kDa  | 0               | 5354100         |
| Putative hydroxypyruvate isomerase OS=Drosophila melanogaster GN=Gip PE=1 SV=1                      | HYI_DROME                        | Gip        | 29 kDa  | 0               | 5027800         |
| CG5010-PA OS=Drosophila melanogaster GN=CG5010 PE=2 SV=1                                            | Q9VX77_DROME                     | CG5010     | 17 kDa  | 0               | 3982200         |
| Eukaryotic translation initiation factor 4G2 OS=Drosophila melanogaster GN=eIF4G2 PE=4 SV=2         | Q9VCH1_DROME                     | eIF4G2     | 227 kDa | 0               | 3954900         |
| Cathepsin L OS=Drosophila melanogaster GN=Cp1 PE=2 SV=2                                             | CATL_DROME                       | Cp1        | 42 kDa  | 0               | 3386300         |
| EH domain containing protein OS=Drosophila melanogaster GN=Past1 PE=2 SV=1                          | Q8T6I0_DROME (+1)                | Past1      | 61 kDa  | 0               | 3256500         |
| CG32521, isoform I OS=Drosophila melanogaster GN=CG32521 PE=4 SV=1                                  | M9PI18_DROME (+1)                | CG32521    | 30 kDa  | 0               | 3242700         |
| GH14088p OS=Drosophila melanogaster GN=Ser7 PE=2 SV=1                                               | Q9W314_DROME                     | Ser7       | 44 kDa  | 0               | 3077900         |
| CG33307, isoform B OS=Drosophila melanogaster GN=BG:DS00941.11 PE=2 SV=1                            | Q961T9_DROME                     | BG         | 20 kDa  | 0               | 2720700         |
| 60 kDa heat shock protein, mitochondrial OS=Drosophila melanogaster GN=Hsp60 PE=1 SV=3              | CH60_DROME                       | Hsp60      | 61 kDa  | 0               | 2648400         |
| CG6028 OS=Drosophila melanogaster GN=CG6028 PE=2 SV=1                                               | Q95SI7_DROME                     | CG6028     | 32 kDa  | 0               | 1699600         |
| CG9915, isoform B OS=Drosophila melanogaster GN=CG9915 PE=4 SV=1                                    | A8JV07_DROME                     | CG9915     | 91 kDa  | 0               | 1693200         |
| CG1342 OS=Drosophila melanogaster GN=Spn100A PE=3 SV=1                                              | Q9VA48_DROME                     | Spn100A    | 73 kDa  | 0               | 1677200         |
| CG5791 OS=Drosophila melanogaster GN=CG5791 PE=2 SV=1                                               | Q9VD48_DROME                     | CG5791     | 10 kDa  | 0               | 1534000         |
| Viking, isoform A OS=Drosophila melanogaster GN=vkg PE=4 SV=1                                       | Q9VMV5_DROME                     | vkg        | 194 kDa | 0               | 1358800         |
| AT19138p OS=Drosophila melanogaster GN=CG30109 PE=2 SV=1                                            | Q6NLJ9_DROME                     | CG30109    | 10 kDa  | 0               | 1236300         |
| Proteasomal ubiquitin receptor ADRM1 homolog OS=Drosophila melanogaster GN=Rpn13 PE=1 SV=1          | ADRM1_DROME                      | Rpn13      | 42 kDa  | 0               | 1219500         |
| Nucleosome remodeling factor-38kD, isoform B OS=Drosophila melanogaster GN=Nurf-38 PE=4 SV=1        | B7YZQ7_DROME (+1)                | Nurf-38    | 33 kDa  | 0               | 1135000         |
| Beta-lactamase-like protein 2 homolog OS=Drosophila melanogaster GN=CG12375 PE=2 SV=1               | LACB2_DROME                      | CG12375    | 33 kDa  | 0               | 1039400         |
| CCHC-type zinc finger protein CG3800 OS=Drosophila melanogaster GN=CG3800 PE=1 SV=1                 | Y3800_DROME                      | CG3800     | 18 kDa  | 0               | 1014900         |
| <b>Total Precursor Intensity of Top 3 Peptides</b>                                                  |                                  |            |         | <b>1.24E+10</b> | <b>1.13E+10</b> |

# Trial 2

| Identified Proteins (252/256)                                                                       | Accession Number  | Alternate ID | Molecular Weight | Control – Trial 2 | Exp – Trial 2 |
|-----------------------------------------------------------------------------------------------------|-------------------|--------------|------------------|-------------------|---------------|
| Sarcoplasmic calcium-binding protein 1, isoform A                                                   | Q8MSI2            | Scp1         | 21.6kDa          | 3.30E+09          | 1.53E+09      |
| Enolase, isoform F OS=Drosophila melanogaster GN=Eno PE=3 SV=1                                      | E1JHR5_DROME (+1) | Eno          | 47 kDa           | 1.93E+09          | 5.36E+08      |
| Neuropeptide-like 2 OS=Drosophila melanogaster GN=Nplp2 PE=1 SV=1                                   | NPLP2 DROME       | Nplp2        | 9 kDa            | 1.56E+09          | 1.11E+10      |
| Glyceraldehyde-3-phosphate dehydrogenase 2 OS=Drosophila melanogaster GN=Gapdh2 PE=1 SV=2           | G3P2 DROME (+1)   | Gapdh2       | 35 kDa           | 9.04E+08          | 6.36E+08      |
| CG34215 OS=Drosophila melanogaster GN=CG34215 PE=4 SV=1                                             | A8DY49 DROME      | CG34215      | 11 kDa           | 8.67E+08          | 3.25E+08      |
| Glyceraldehyde-3-phosphate dehydrogenase 1 OS=Drosophila melanogaster GN=Gapdh1 PE=2 SV=2           | G3P1 DROME        | Gapdh1       | 35 kDa           | 8.04E+08          | 8.55E+08      |
| Nucleoside diphosphate kinase OS=Drosophila melanogaster GN=awd PE=1 SV=3                           | NDKA DROME        | awd          | 17 kDa           | 6.79E+08          | 2.95E+08      |
| CG16712, isoform B OS=Drosophila melanogaster GN=CG16712 PE=2 SV=1                                  | Q9VQT8 DROME      | CG16712      | 9 kDa            | 3.33E+08          | 7644500       |
| CG12493, isoform B OS=Drosophila melanogaster GN=CG12493 PE=4 SV=1                                  | M9PHF9_DROME (+1) | CG12493      | 32 kDa           | 3.27E+08          | 0             |
| CG17919 OS=Drosophila melanogaster GN=CG17919 PE=2 SV=1                                             | Q9V109 DROME      | CG17919      | 23 kDa           | 2.88E+08          | 8.41E+07      |
| Sh3beta, isoform E OS=Drosophila melanogaster GN=Sh3beta PE=4 SV=1                                  | M9MRQ6_DROME (+3) | Sh3beta      | 54 kDa           | 2.51E+08          | 7.24E+07      |
| Short stop, isoform H OS=Drosophila melanogaster GN=shot PE=4 SV=1                                  | A1Z9J3 DROME      | shot         | 990 kDa          | 2.23E+08          | 0             |
| Fructose-bisphosphate aldolase OS=Drosophila melanogaster GN=Ald PE=2 SV=1                          | A4V3G1_DROME (+1) | Ald          | 40 kDa           | 1.95E+08          | 4.78E+08      |
| Protein bangles and beads OS=Drosophila melanogaster GN=bnb PE=1 SV=1                               | BNB DROME         | bnb          | 46 kDa           | 1.87E+08          | 2.66E+07      |
| CG44008, isoform A OS=Drosophila melanogaster GN=CG44008 PE=4 SV=1                                  | M9PBA3 DROME      | CG44008      | 9 kDa            | 1.35E+08          | 7.50E+07      |
| Rha OS=Drosophila melanogaster GN=rha PE=4 SV=1                                                     | Q9VBR7 DROME      | rha          | 152 kDa          | 1.29E+08          | 1.86E+07      |
| CG6028 OS=Drosophila melanogaster GN=CG6028 PE=2 SV=1                                               | Q95SI7 DROME      | CG6028       | 32 kDa           | 1.27E+08          | 6015000       |
| CG4944-PA, isoform A OS=Drosophila melanogaster GN=cib PE=1 SV=1                                    | O97428 DROME      | cib          | 14 kDa           | 1.26E+08          | 6.20E+07      |
| Odorant-binding protein 99c OS=Drosophila melanogaster GN=Obp99c PE=2 SV=1                          | Q9VAI9 DROME      | Obp99c       | 17 kDa           | 1.18E+08          | 7.17E+07      |
| CG30395 OS=Drosophila melanogaster GN=CG30395 PE=4 SV=2                                             | Q8MLV0 DROME      | CG30395      | 98 kDa           | 1.12E+08          | 1.53E+07      |
| Calmodulin OS=Drosophila melanogaster GN=Cam PE=1 SV=2                                              | CALM DROME        | Cam          | 17 kDa           | 1.11E+08          | 6.38E+07      |
| Chitinase-like protein Idgf4 OS=Drosophila melanogaster GN=Idgf4 PE=2 SV=1                          | IDGF4 DROME       | Idgf4        | 49 kDa           | 1.09E+08          | 1.82E+07      |
| Anon1A4 OS=Drosophila melanogaster GN=Df31 PE=2 SV=1                                                | O16043 DROME      | Df31         | 19 kDa           | 9.14E+07          | 5.62E+07      |
| CG7998 OS=Drosophila melanogaster GN=Mdh2 PE=2 SV=1                                                 | Q9VEB1 DROME      | Mdh2         | 35 kDa           | 8.70E+07          | 1.24E+08      |
| CG7966 OS=Drosophila melanogaster GN=CG7966 PE=4 SV=2                                               | Q9VFZ4 DROME      | CG7966       | 55 kDa           | 7.92E+07          | 0             |
| MIP08680p OS=Drosophila melanogaster GN=vib PE=2 SV=1                                               | Q9VDY8 DROME      | vib          | 31 kDa           | 7.13E+07          | 3117000       |
| Cathepsin L OS=Drosophila melanogaster GN=Cp1 PE=2 SV=2                                             | CATL DROME        | Cp1          | 42 kDa           | 6.55E+07          | 6756100       |
| General odorant-binding protein 99a OS=Drosophila melanogaster GN=Obp99a PE=1 SV=2                  | OB99A DROME       | Obp99a       | 16 kDa           | 6.50E+07          | 0             |
| Aconitate hydratase OS=Drosophila melanogaster GN=Irp-1B PE=3 SV=1                                  | Q9VGZ3 DROME      | Irp-1B       | 99 kDa           | 5.82E+07          | 1.72E+07      |
| CG18594 OS=Drosophila melanogaster GN=Pebp1 PE=2 SV=1                                               | Q9VD01 DROME      | Pebp1        | 20 kDa           | 5.69E+07          | 3.56E+07      |
| CG1532, isoform B OS=Drosophila melanogaster GN=CG1532 PE=4 SV=1                                    | Q9VRD4 DROME      | CG1532       | 32 kDa           | 5.24E+07          | 5.53E+07      |
| CG18135, isoform E OS=Drosophila melanogaster GN=CG18135 PE=4 SV=1                                  | M9P196_DROME (+4) | CG18135      | 73 kDa           | 5.10E+07          | 1.11E+08      |
| CG5804-PA OS=Drosophila melanogaster GN=CG5804 PE=2 SV=1                                            | Q9VSP9 DROME      | CG5804       | 9 kDa            | 4.97E+07          | 6.44E+07      |
| Heat shock 70 kDa protein cognate 4 OS=Drosophila melanogaster GN=Hsc70-4 PE=1 SV=3                 | HSP7D DROME       | Hsc70-4      | 71 kDa           | 4.89E+07          | 1.12E+07      |
| Putative hydroxypyruvate isomerase OS=Drosophila melanogaster GN=Gip PE=1 SV=1                      | HYI DROME         | Gip          | 29 kDa           | 4.57E+07          | 1.91E+07      |
| Transient-receptor-potential-like protein OS=Drosophila melanogaster GN=trpl PE=1 SV=2              | TRPL DROME        | trpl         | 128 kDa          | 4.02E+07          | 0             |
| Eip55E OS=Drosophila melanogaster GN=Eip55E PE=2 SV=1                                               | Q7JXZ2 DROME      | Eip55E       | 43 kDa           | 3.97E+07          | 0             |
| Cytochrome b5 OS=Drosophila melanogaster GN=Cyt-b5 PE=2 SV=1                                        | CYB5 DROME        | Cyt-b5       | 15 kDa           | 3.62E+07          | 4085100       |
| Probable isoaspartyl peptidase/L-asparaginase CG7860 OS=Drosophila melanogaster GN=CG7860 PE=1 SV=1 | ASGL1 DROME       | CG7860       | 35 kDa           | 3.45E+07          | 1.44E+07      |
| Adenylosuccinate synthetase OS=Drosophila melanogaster GN=AdSS PE=2 SV=1                            | PURA DROME        | AdSS         | 49 kDa           | 3.36E+07          | 3.54E+07      |
| Angiotensin-converting enzyme-related protein OS=Drosophila melanogaster GN=Acer PE=1 SV=1          | ACER DROME (+1)   | Acer         | 73 kDa           | 3.09E+07          | 1.32E+07      |
| CG9119 OS=Drosophila melanogaster GN=CG9119 PE=2 SV=1                                               | Q9W0J9 DROME      | CG9119       | 36 kDa           | 3.05E+07          | 7.75E+07      |
| Ribosomal protein S10b, isoform D OS=Drosophila melanogaster GN=RpS10b PE=4 SV=1                    | M9NEQ9_DROME (+1) | RpS10b       | 18 kDa           | 3.05E+07          | 1052700       |
| Ejaculatory bulb-specific protein 3 OS=Drosophila melanogaster GN=PebIII PE=1 SV=2                  | PEB3 DROME        | PebIII       | 15 kDa           | 3.04E+07          | 2.51E+07      |
| LD45324p OS=Drosophila melanogaster GN=Prx5 PE=2 SV=1                                               | Q960M4 DROME      | Prx5         | 20 kDa           | 2.74E+07          | 0             |
| Glutactin OS=Drosophila melanogaster GN=Git PE=1 SV=2                                               | GLT DROME (+1)    | Git          | 119 kDa          | 2.54E+07          | 0             |
| Accessory gland-specific peptide 26Aa OS=Drosophila melanogaster GN=Acp26Aa PE=2 SV=2               | MS2A DROME        | Acp26Aa      | 30 kDa           | 2.49E+07          | 0             |
| Dietary and metabolic glutamate transporter OS=Drosophila melanogaster GN=dmGlut PE=2 SV=2          | Q9VKC9 DROME      | dmGlut       | 54 kDa           | 2.36E+07          | 0             |
| CG16713-PA OS=Drosophila melanogaster GN=CG16713-RA PE=2 SV=1                                       | Q9VQT7 DROME      | CG16713-RA   | 9 kDa            | 2.07E+07          | 2668100       |
| CG10031 OS=Drosophila melanogaster GN=CG10031 PE=4 SV=2                                             | Q9VQU0 DROME      | CG10031      | 14 kDa           | 1.96E+07          | 202910        |
| CG9391, isoform C OS=Drosophila melanogaster GN=CG9391 PE=2 SV=1                                    | Q7KTW5 DROME      | CG9391       | 31 kDa           | 1.92E+07          | 5073800       |
| CG4365, isoform C OS=Drosophila melanogaster GN=CG4365 PE=3 SV=1                                    | Q8IPU3_DROME (+2) | CG4365       | 39 kDa           | 1.77E+07          | 8736000       |
| GH04080p OS=Drosophila melanogaster GN=PPO1 PE=2 SV=1                                               | Q7K2W6 DROME      | PPO1         | 79 kDa           | 1.75E+07          | 9099000       |

|                                                                                           |                   |          |          |                 |                 |
|-------------------------------------------------------------------------------------------|-------------------|----------|----------|-----------------|-----------------|
| Esterase 6, isoform B OS=Drosophila melanogaster GN=Est-6 PE=2 SV=1                       | C9QP21_DROME (+1) | Est-6    | 61 kDa   | 1.55E+07        | 5.72E+07        |
| Obp44a OS=Drosophila melanogaster GN=Obp44a PE=2 SV=1                                     | Q7K084_DROME      | Obp44a   | 16 kDa   | 1.53E+07        | 2.16E+08        |
| DnaJ-like-2, isoform A OS=Drosophila melanogaster GN=Droj2 PE=2 SV=1                      | Q9VVF9_DROME      | Droj2    | 45 kDa   | 1.44E+07        | 0               |
| Eukaryotic translation initiation factor 5 OS=Drosophila melanogaster GN=eIF5 PE=1 SV=1   | IF5_DROME         | eIF5     | 52 kDa   | 1.44E+07        | 0               |
| Guanylate cyclase OS=Drosophila melanogaster GN=Gyc32E PE=3 SV=1                          | A8DYZ3_DROME (+1) | Gyc32E   | 134 kDa  | 1.33E+07        | 0               |
| CG5397, isoform A OS=Drosophila melanogaster GN=CG5397 PE=2 SV=1                          | Q9VPZ5_DROME      | CG5397   | 71 kDa   | 1.27E+07        | 0               |
| General odorant-binding protein 19d OS=Drosophila melanogaster GN=Obp19d PE=2 SV=2        | OB19D_DROME       | Obp19d   | 17 kDa   | 1.23E+07        | 4.39E+07        |
| CG31872, isoform A OS=Drosophila melanogaster GN=CG17093 PE=2 SV=2                        | Q9VKT1_DROME      | CG17093  | 119 kDa  | 1.10E+07        | 947160          |
| Muscle-specific protein 300 kDa, isoform G OS=Drosophila melanogaster GN=Msp300 PE=4 SV=1 | M9MRJ4_DROME (+1) | Msp300   | 1508 kDa | 1.07E+07        | 0               |
| CG4797, isoform B OS=Drosophila melanogaster GN=CG4797 PE=2 SV=2                          | Q8MLQ7_DROME (+1) | CG4797   | 59 kDa   | 1.07E+07        | 0               |
| Ran, isoform B OS=Drosophila melanogaster GN=Ran PE=4 SV=1                                | A4V4A5_DROME (+1) | Ran      | 25 kDa   | 1.02E+07        | 2.81E+07        |
| RH08789p OS=Drosophila melanogaster GN=ssp7 PE=2 SV=1                                     | Q8IR95_DROME      | ssp7     | 10 kDa   | 1.01E+07        | 5.59E+07        |
| Glutathione S transferase S1, isoform C OS=Drosophila melanogaster GN=GstS1 PE=2 SV=1     | A4UZL5_DROME (+1) | GstS1    | 28 kDa   | 9817000         | 8.64E+07        |
| Moesin, isoform K OS=Drosophila melanogaster GN=Moe PE=2 SV=1                             | C7LAH9_DROME (+3) | Moe      | 76 kDa   | 9339400         | 1549700         |
| CG18446 OS=Drosophila melanogaster GN=CG18446 PE=2 SV=1                                   | Q7JZC5_DROME      | CG18446  | 55 kDa   | 9275600         | 0               |
| Niemann-Pick type C-2g OS=Drosophila melanogaster GN=Npc2g PE=4 SV=1                      | Q9VA42_DROME      | Npc2g    | 17 kDa   | 8460600         | 1.26E+07        |
| FI04779p OS=Drosophila melanogaster GN=HBS1 PE=2 SV=2                                     | Q9W074_DROME      | HBS1     | 74 kDa   | 8268000         | 0               |
| GH01724p OS=Drosophila melanogaster GN=p47 PE=2 SV=1                                      | Q7K3Z3_DROME      | p47      | 43 kDa   | 8248000         | 0               |
| Isocitrate dehydrogenase [NADP] OS=Drosophila melanogaster GN=ldh PE=3 SV=2               | B7Z0E0_DROME (+4) | ldh      | 54 kDa   | 8098400         | 3.65E+08        |
| Jonah 44E OS=Drosophila melanogaster GN=Jon44E PE=2 SV=1                                  | Q7JX43_DROME (+5) | Jon44E   | 30 kDa   | 7952900         | 0               |
| Peptidyl-prolyl cis-trans isomerase OS=Drosophila melanogaster GN=Cyp1 PE=1 SV=2          | PPIA_DROME        | Cyp1     | 25 kDa   | 7729600         | 2.17E+07        |
| CG15201 OS=Drosophila melanogaster GN=CG15201 PE=2 SV=1                                   | Q9VZ24_DROME      | CG15201  | 13 kDa   | 7232300         | 1.46E+07        |
| Doublesex-Mab related 99B OS=Drosophila melanogaster GN=dmt99B PE=2 SV=1                  | Q9VAI8_DROME      | dmt99B   | 55 kDa   | 6996900         | 3.25E+07        |
| Seminal fluid protein 87B OS=Drosophila melanogaster GN=Sfp87B PE=2 SV=1                  | B4ZJA7_DROME      | Sfp87B   | 10 kDa   | 6973300         | 2.61E+07        |
| LD21576p OS=Drosophila melanogaster GN=Nap1 PE=2 SV=1                                     | Q9W1G7_DROME      | Nap1     | 43 kDa   | 6897500         | 0               |
| CG30197 OS=Drosophila melanogaster GN=CG30197 PE=2 SV=1                                   | Q8MKJ5_DROME      | CG30197  | 12 kDa   | 6873300         | 1.29E+07        |
| CG6852, isoform C OS=Drosophila melanogaster GN=CG6852 PE=2 SV=1                          | Q9VVT6_DROME      | CG6852   | 12 kDa   | 6705200         | 0               |
| FI21560p1 OS=Drosophila melanogaster GN=wdp PE=2 SV=1                                     | Q9W266_DROME      | wdp      | 75 kDa   | 6577300         | 7604900         |
| Transferrin OS=Drosophila melanogaster GN=Tsf1 PE=3 SV=1                                  | Q9VWV6_DROME      | Tsf1     | 72 kDa   | 6432800         | 4.21E+08        |
| CG11784 OS=Drosophila melanogaster GN=GstE13 PE=2 SV=1                                    | Q7JVI6_DROME      | GstE13   | 26 kDa   | 6397800         | 0               |
| CG17032, isoform B OS=Drosophila melanogaster GN=CG17032 PE=2 SV=1                        | Q9VUV8_DROME      | CG17032  | 31 kDa   | 5991800         | 5644700         |
| GH13304p OS=Drosophila melanogaster GN=Pglym78 PE=2 SV=2                                  | Q9VAN7_DROME      | Pglym78  | 29 kDa   | 5446300         | 6.91E+07        |
| CG11400 OS=Drosophila melanogaster GN=CG11400 PE=2 SV=1                                   | Q7JV39_DROME      | CG11400  | 22 kDa   | 5000100         | 5.42E+07        |
| CG14430-PA OS=Drosophila melanogaster GN=bou PE=2 SV=1                                    | Q9W3T7_DROME      | bou      | 17 kDa   | 4840600         | 0               |
| A kinase anchor protein 200, isoform G OS=Drosophila melanogaster GN=Akap200 PE=4 SV=1    | Q86BM5_DROME (+2) | Akap200  | 88 kDa   | 4620400         | 6386900         |
| CG11089 OS=Drosophila melanogaster GN=CG11089 PE=2 SV=1                                   | Q9VC18_DROME      | CG11089  | 63 kDa   | 4326100         | 6900600         |
| Bifocal, isoform D OS=Drosophila melanogaster GN=bif PE=4 SV=1                            | M9PGW8_DROME (+4) | bif      | 124 kDa  | 4320100         | 0               |
| BG642312, isoform A OS=Drosophila melanogaster GN=BG642312 PE=2 SV=1                      | Q0E8H8_DROME      | BG642312 | 9 kDa    | 4312400         | 1227900         |
| Rab8, isoform B OS=Drosophila melanogaster GN=Rab8 PE=3 SV=1                              | M9NEE8_DROME (+1) | Rab8     | 20 kDa   | 4262600         | 0               |
| Myosin light chain cytoplasmic, isoform B OS=Drosophila melanogaster GN=Mlc-c PE=4 SV=1   | M9NEW1_DROME (+1) | Mlc-c    | 17 kDa   | 4207900         | 0               |
| Cystatin-like protein OS=Drosophila melanogaster GN=Cys PE=2 SV=2                         | CYTL_DROME        | Cys      | 13 kDa   | 4124400         | 1.98E+07        |
| CG12811 OS=Drosophila melanogaster GN=CG12811 PE=2 SV=1                                   | Q9VH37_DROME      | CG12811  | 23 kDa   | 4105500         | 0               |
| CG33307, isoform B OS=Drosophila melanogaster GN=BG:DS00941.11 PE=2 SV=1                  | Q961T9_DROME      | BG       | 20 kDa   | 4041600         | 0               |
| Alpha-amylase A OS=Drosophila melanogaster GN=Amy-p PE=2 SV=1                             | AMYA_DROME (+1)   | Amy-p    | 54 kDa   | 3983600         | 1.20E+08        |
| Neural lazaro, isoform B OS=Drosophila melanogaster GN=NLaz PE=4 SV=1                     | M9PBN2_DROME (+1) | NLaz     | 27 kDa   | 3832200         | 0               |
| <b>Total Precursor Intensity of Top 3 Peptides</b>                                        |                   |          |          | <b>1.45E+10</b> | <b>1.87E+10</b> |



## Trial 3, 4, and 5

| Identified Proteins                                                                            | Accession Number  | Gene Name  | Mr/kDa  | Control – Trial 3 | Exp – Trial 3 | Control – Trial 4 | Exp – Trial 4 | Control – Trial 5 | Exp – Trial 5 |
|------------------------------------------------------------------------------------------------|-------------------|------------|---------|-------------------|---------------|-------------------|---------------|-------------------|---------------|
| Neuropeptide-like 2 OS=Drosophila melanogaster GN=Nplp2 PE=1 SV=1                              | NPLP2_DROME       | Nplp2      | 9 kDa   | 1.24E+11          | 1.63E+11      | 1.10E+11          | 9.92E+10      | 1.05E+11          | 1.14E+11      |
| Protein bangles and beads OS=Drosophila melanogaster GN=bnb PE=1 SV=1                          | BNB_DROME         | bnb        | 46 kDa  | 1.39E+09          | 2.58E+09      | 1.30E+09          | 4.88E+09      | 1.20E+09          | 4.13E+09      |
| Accessory gland protein Acp36DE OS=Drosophila melanogaster GN=Acp36DE PE=2 SV=1                | A36DE_DROME       | Acp36DE    | 102 kDa | 2.52E+09          | 1.78E+09      | 2.64E+09          | 9.37E+08      | 1.90E+09          | 6.46E+08      |
| CG1648, isoform B OS=Drosophila melanogaster GN=CG1648 PE=4 SV=1                               | A1Z7Z4_DROME (+1) | CG1648     | 24 kDa  | 1.71E+09          | 6.41E+08      | 6.54E+09          | 1.74E+09      | 6.16E+09          | 5.97E+08      |
| Drosomycin OS=Drosophila melanogaster GN=Drs PE=1 SV=1                                         | DMYC_DROME        | Drs        | 8 kDa   | 7.35E+09          | 2.36E+10      | 5.73E+09          | 1.87E+10      | 3.74E+09          | 2.32E+10      |
| Odorant-binding protein 99c OS=Drosophila melanogaster GN=Obp99c PE=2 SV=1                     | Q9VAI9_DROME      | Obp99c     | 17 kDa  | 1.25E+10          | 1.63E+10      | 7.56E+09          | 7.80E+09      | 7.48E+09          | 1.17E+10      |
| Accessory gland protein Acp62F OS=Drosophila melanogaster GN=Acp62F PE=2 SV=1                  | A62F_DROME        | Acp62F     | 13 kDa  | 3.04E+09          | 3.19E+09      | 6.02E+09          | 2.87E+09      | 6.29E+09          | 3.65E+09      |
| Ubiquitin-63E, isoform C OS=Drosophila melanogaster GN=Ubi-p63E PE=4 SV=1                      | A4V1F9_DROME (+5) | Ubi-p63E   | 86 kDa  | 8.41E+09          | 8.93E+09      | 3.07E+09          | 3.84E+09      | 1.10E+09          | 2.60E+09      |
| Niemann-Pick type C-2g OS=Drosophila melanogaster GN=Npc2g PE=4 SV=1                           | Q9VA42_DROME      | Npc2g      | 17 kDa  | 7.99E+09          | 1.30E+10      | 5.17E+09          | 7.93E+09      | 5.72E+09          | 8.62E+09      |
| Arginine kinase, isoform G OS=Drosophila melanogaster GN=Argk PE=3 SV=2                        | A8JNP1_DROME (+1) | Argk       | 40 kDa  | 7.02E+08          | 3.14E+09      | 3.15E+09          | 6.79E+08      | 4.58E+09          | 4.48E+08      |
| CG5804-PA OS=Drosophila melanogaster GN=CG5804 PE=2 SV=1                                       | Q9VSP9_DROME      | CG5804     | 9 kDa   | 1.24E+10          | 1.27E+10      | 1.40E+10          | 8.03E+09      | 1.16E+10          | 7.14E+09      |
| CG2720-PA OS=Drosophila melanogaster GN=Hop PE=2 SV=1                                          | Q9VPN5_DROME      | Hop        | 56 kDa  | 8.54E+08          | 9.37E+08      | 1.12E+09          | 6.65E+08      | 7.11E+08          | 4.69E+08      |
| CG16712, isoform B OS=Drosophila melanogaster GN=CG16712 PE=2 SV=1                             | Q9VQT8_DROME      | CG16712    | 9 kDa   | 5.65E+10          | 2.92E+10      | 4.20E+10          | 5.00E+10      | 3.01E+10          | 3.05E+10      |
| CG4944-PA, isoform A OS=Drosophila melanogaster GN=cib PE=1 SV=1                               | O97428_DROME      | cib        | 14 kDa  | 2.54E+09          | 3.54E+09      | 2.13E+09          | 1.47E+09      | 1.86E+09          | 1.28E+09      |
| CG30395 OS=Drosophila melanogaster GN=CG30395 PE=4 SV=2                                        | Q8MLV0_DROME      | CG30395    | 98 kDa  | 1.29E+09          | 1.14E+09      | 1.35E+09          | 3.20E+08      | 1.38E+09          | 2.84E+08      |
| Phosphoglycerate kinase OS=Drosophila melanogaster GN=Pgk PE=3 SV=1                            | M9PCE0_DROME (+1) | Pgk        | 44 kDa  | 1.73E+09          | 2.43E+09      | 2.64E+09          | 2.27E+09      | 2.14E+09          | 1.17E+09      |
| Probable elongation factor 1-beta OS=Drosophila melanogaster GN=Ef1beta PE=1 SV=3              | EF1B_DROME        | Ef1beta    | 24 kDa  | 9.95E+09          | 2.64E+09      | 8.76E+09          | 3.35E+09      | 4.08E+09          | 1.56E+09      |
| Anon1A4 OS=Drosophila melanogaster GN=Df31 PE=2 SV=1                                           | O16043_DROME      | Df31       | 19 kDa  | 2.10E+08          | 2.61E+08      | 3.40E+08          | 9.18E+08      | 2.92E+08          | 5.44E+08      |
| 12 kDa FK506-binding protein OS=Drosophila melanogaster GN=FK506-bp2 PE=3 SV=2                 | FKB12_DROME       | FK506-bp2  | 12 kDa  | 7.16E+09          | 4.96E+09      | 5.93E+09          | 1.07E+10      | 6.49E+09          | 1.31E+10      |
| Acyl-CoA-binding protein homolog OS=Drosophila melanogaster GN=Dbi PE=2 SV=1                   | ACBP_DROME        | Dbi        | 10 kDa  | 2.29E+09          | 3.28E+09      | 5.11E+09          | 2.09E+09      | 7.67E+08          | 7.31E+08      |
| General odorant-binding protein 99a OS=Drosophila melanogaster GN=Obp99a PE=1 SV=2             | OB99A_DROME       | Obp99a     | 16 kDa  | 2.92E+09          | 4.90E+09      | 2.09E+09          | 1.68E+09      | 1.65E+09          | 1.08E+09      |
| Obp44a OS=Drosophila melanogaster GN=Obp44a PE=2 SV=1                                          | Q7K084_DROME      | Obp44a     | 16 kDa  | 1.37E+09          | 6.63E+08      | 1.83E+09          | 6.91E+08      | 1.78E+09          | 6.11E+08      |
| CG34215 OS=Drosophila melanogaster GN=CG34215 PE=4 SV=1                                        | A8DY49_DROME      | CG34215    | 11 kDa  | 1.10E+09          | 1.27E+09      | 1.15E+09          | 1.44E+09      | 1.20E+09          | 5.65E+08      |
| RH08789p OS=Drosophila melanogaster GN=ssp7 PE=2 SV=1                                          | Q8IR95_DROME      | ssp7       | 10 kDa  | 3.19E+09          | 3.51E+09      | 3.51E+09          | 8.15E+09      | 3.10E+09          | 9.26E+09      |
| Aldose 1-epimerase OS=Drosophila melanogaster GN=CG10467-RA PE=2 SV=1                          | Q9VRU1_DROME      | CG10467-RA | 40 kDa  | 2.14E+08          | 1.29E+09      | 1.04E+08          | 9.32E+08      | 1.43E+08          | 1.48E+09      |
| Glycerol-3-phosphate dehydrogenase [NAD(+)] OS=Drosophila melanogaster GN=Gpdh PE=3 SV=1       | M9PC43_DROME      | Gpdh       | 39 kDa  | 5.19E+08          | 1.36E+08      | 1.49E+09          | 2.59E+08      | 9.25E+08          | 8.30E+07      |
| Bacchus, isoform B OS=Drosophila melanogaster GN=Bacc PE=2 SV=1                                | Q9VQF7_DROME      | Bacc       | 15 kDa  | 5.51E+08          | 6.57E+08      | 9.56E+08          | 9.54E+08      | 6.57E+08          | 7.16E+08      |
| Glyceraldehyde-3-phosphate dehydrogenase 2 OS=Drosophila melanogaster GN=Gapdh2 PE=1 SV=2      | G3P2_DROME (+1)   | Gapdh2     | 35 kDa  | 1.02E+09          | 3.40E+08      | 2.11E+09          | 3.69E+08      | 2.57E+09          | 6.22E+07      |
| Accessory gland protein Acp63F OS=Drosophila melanogaster GN=Acp63F PE=2 SV=2                  | A63F_DROME        | Acp63F     | 9 kDa   | 2.63E+09          | 3.11E+09      | 3.78E+09          | 1.89E+09      | 2.34E+09          | 2.25E+09      |
| CG6409, isoform B OS=Drosophila melanogaster GN=CG6409 PE=2 SV=2                               | Q9VTC3_DROME      | CG6409     | 40 kDa  | 1.67E+08          | 6.74E+08      | 6.49E+08          | 7.75E+08      | 2.24E+08          | 8.18E+07      |
| Hsc/Hsp70-interacting protein related, isoform B OS=Drosophila melanogaster GN=HIP-R PE=4 SV=1 | E2QD63_DROME (+2) | HIP-R      | 41 kDa  | 1.79E+09          | 4.36E+08      | 1.26E+09          | 9.87E+08      | 1.29E+09          | 4.40E+08      |

|                                                                                             |                       |             |         |          |          |          |          |          |          |
|---------------------------------------------------------------------------------------------|-----------------------|-------------|---------|----------|----------|----------|----------|----------|----------|
| Accessory gland-specific peptide 57Da<br>OS=Drosophila melanogaster GN=Mst57Da<br>PE=2 SV=1 | MS57A_DRO<br>ME       | Mst57Da     | 7 kDa   | 1.83E+10 | 1.06E+10 | 1.48E+10 | 3.82E+09 | 1.72E+10 | 4.00E+09 |
| Adenylyl cyclase-associated protein<br>OS=Drosophila melanogaster GN=capt PE=2<br>SV=2      | Q9VPX6_DR<br>OME (+1) | capt        | 84 kDa  | 4.76E+08 | 4.36E+08 | 6.03E+08 | 5.73E+08 | 3.16E+08 | 1.53E+08 |
| General odorant-binding protein 56d<br>OS=Drosophila melanogaster GN=Obp56d PE=1<br>SV=2    | OB56D_DRO<br>ME       | Obp56d      | 14 kDa  | 6.14E+08 | 7.37E+08 | 4.70E+08 | 8.74E+08 | 4.98E+08 | 9.45E+08 |
| Protein Turandot A OS=Drosophila melanogaster<br>GN=TotA PE=1 SV=1                          | TOTA_DRO<br>ME        | TotA        | 14 kDa  | 1.48E+09 | 5.23E+09 | 1.32E+09 | 2.40E+09 | 1.56E+09 | 3.84E+09 |
| Fructose-bisphosphate aldolase OS=Drosophila<br>melanogaster GN=Ald PE=2 SV=1               | A4V3G1_DR<br>OME (+1) | Ald         | 40 kDa  | 1.07E+08 | 2.73E+08 | 1.71E+08 | 6.36E+08 | 1.23E+08 | 1.54E+09 |
| CG44008, isoform A OS=Drosophila<br>melanogaster GN=CG44008 PE=4 SV=1                       | M9PBA3_DR<br>OME      | CG44008     | 9 kDa   | 1.96E+09 | 9.82E+08 | 2.23E+09 | 3.35E+09 | 2.31E+09 | 1.38E+09 |
| CG15369, isoform B OS=Drosophila<br>melanogaster GN=CG15369 PE=4 SV=1                       | Q9V370_DR<br>OME      | CG15369     | 13 kDa  | 2.20E+08 | 1.01E+09 | 1.30E+08 | 3.52E+08 | 1.24E+08 | 4.34E+08 |
| Triosephosphate isomerase OS=Drosophila<br>melanogaster GN=Tpi PE=1 SV=3                    | TPIS_DROM<br>E        | Tpi         | 27 kDa  | 1.49E+09 | 8.23E+08 | 2.02E+09 | 9.03E+08 | 1.91E+09 | 9.68E+08 |
| Ductus ejaculatorius peptide 99B OS=Drosophila<br>melanogaster GN=Dup99B PE=1 SV=2          | DEJP_DROM<br>E        | Dup99B      | 6 kDa   | 1.27E+10 | 7.81E+09 | 4.76E+09 | 2.07E+08 | 3.27E+09 | 2.16E+08 |
| Peptidyl-prolyl cis-trans isomerase<br>OS=Drosophila melanogaster GN=Cyp1 PE=1<br>SV=2      | PPIA_DROM<br>E        | Cyp1        | 25 kDa  | 2.74E+08 | 4.93E+08 | 6.58E+08 | 2.81E+08 | 4.51E+08 | 6.44E+08 |
| AT30951p OS=Drosophila melanogaster<br>GN=CG9920 PE=2 SV=1                                  | Q9VFN5_DR<br>OME      | CG9920      | 11 kDa  | 6.76E+08 | 1.60E+09 | 1.51E+09 | 2.12E+08 | 1.21E+09 | 2.41E+08 |
| Odorant-binding protein 56g, isoform A<br>OS=Drosophila melanogaster GN=Obp56g PE=4<br>SV=1 | A1ZBQ3_DR<br>OME (+1) | Obp56g      | 14 kDa  | 5.76E+08 | 3.84E+08 | 8.04E+08 | 1.51E+08 | 8.79E+08 | 5.79E+08 |
| Odorant binding protein c OS=Drosophila<br>melanogaster GN=Obp51a PE=2 SV=1                 | Q7KE33_DR<br>OME      | Obp51a      | 13 kDa  | 3.10E+09 | 1.96E+09 | 2.27E+09 | 6.87E+08 | 1.66E+09 | 7.37E+08 |
| CG18594 OS=Drosophila melanogaster<br>GN=Pebp1 PE=2 SV=1                                    | Q9VD01_DR<br>OME      | Pebp1       | 20 kDa  | 2.89E+08 | 2.79E+08 | 8.86E+08 | 0        | 1.78E+08 | 3.82E+07 |
| CG8498, isoform B OS=Drosophila melanogaster<br>GN=CG8498 PE=2 SV=1                         | Q9VLS4_DR<br>OME      | CG8498      | 10 kDa  | 2.54E+08 | 7.84E+08 | 1.80E+09 | 1.19E+08 | 3.49E+08 | 1.09E+08 |
| CG17278 OS=Drosophila melanogaster<br>GN=CG17278 PE=2 SV=2                                  | Q9VDG1_DR<br>OME      | CG17278     | 9 kDa   | 2.82E+08 | 1.84E+08 | 2.50E+08 | 3.59E+08 | 2.32E+08 | 2.17E+08 |
| General odorant-binding protein 56a<br>OS=Drosophila melanogaster GN=Obp56a PE=1<br>SV=1    | OB56A_DRO<br>ME       | Obp56a      | 15 kDa  | 3.77E+07 | 1.95E+09 | 2.38E+07 | 1.40E+09 | 5.69E+07 | 3.48E+09 |
| GH15296p                                                                                    | Q8MSI2_DR<br>OME      | Scp1        | 21.7kDa | 2.38E+08 | 8.86E+07 | 3.67E+08 | 1.44E+08 | 3.07E+08 | 4.86E+08 |
| Protein Turandot C OS=Drosophila melanogaster<br>GN=TotC PE=1 SV=1                          | TOTC_DRO<br>ME        | TotC        | 14 kDa  | 9.56E+08 | 3.69E+08 | 8.11E+08 | 5.61E+08 | 8.63E+08 | 4.87E+08 |
| CG11400 OS=Drosophila melanogaster<br>GN=CG11400 PE=2 SV=1                                  | Q7JV39_DR<br>OME      | CG11400     | 22 kDa  | 4.82E+08 | 7.41E+08 | 7.35E+08 | 3.75E+08 | 7.06E+08 | 4.52E+08 |
| CG14961 OS=Drosophila melanogaster<br>GN=CG14961 PE=4 SV=1                                  | Q9VZQ7_DR<br>OME      | CG14961     | 101 kDa | 8.49E+07 | 7.35E+08 | 4.91E+07 | 2.29E+08 | 4.49E+07 | 0        |
| CG6503 OS=Drosophila melanogaster<br>GN=CG6503 PE=2 SV=2                                    | Q9VBF3_DR<br>OME      | CG6503      | 7 kDa   | 4.05E+07 | 6.40E+09 | 1.15E+08 | 2.01E+07 | 0        | 0        |
| CG16704, isoform B OS=Drosophila<br>melanogaster GN=CG16704 PE=2 SV=1                       | Q9VQT5_DR<br>OME      | CG16704     | 9 kDa   | 5.52E+09 | 1.15E+10 | 5.22E+09 | 1.17E+10 | 4.51E+09 | 1.36E+10 |
| GH13304p OS=Drosophila melanogaster<br>GN=Pglym78 PE=2 SV=2                                 | Q9VAN7_DR<br>OME      | Pglym78     | 29 kDa  | 9.42E+07 | 2.41E+07 | 3.24E+08 | 4.78E+07 | 2.39E+08 | 0        |
| Crammer OS=Drosophila melanogaster GN=cer<br>PE=1 SV=1                                      | A1ZBK7_DR<br>OME      | cer         | 9 kDa   | 1.51E+08 | 1.92E+08 | 1.25E+08 | 1.85E+08 | 1.09E+08 | 1.71E+08 |
| CG18064-PA OS=Drosophila melanogaster<br>GN=Met75Ca PE=4 SV=1                               | Q9V449_DR<br>OME      | Met75Ca     | 6 kDa   | 6.80E+08 | 5.03E+08 | 1.92E+08 | 2.76E+08 | 1.27E+08 | 5.07E+07 |
| Elongation factor 1-alpha 1 OS=Drosophila<br>melanogaster GN=Ef1alpha48D PE=1 SV=2          | EF1A1_DRO<br>ME       | Ef1alpha48D | 50 kDa  | 1.34E+10 | 5.70E+09 | 1.20E+10 | 7.08E+09 | 1.32E+10 | 7.76E+09 |
| CG13023, isoform A OS=Drosophila<br>melanogaster GN=CG13023 PE=4 SV=1                       | Q9VVC0_DR<br>OME      | CG13023     | 45 kDa  | 2.27E+08 | 3.34E+08 | 6.45E+07 | 2.08E+08 | 1.14E+08 | 1.20E+08 |
| Enolase, isoform F OS=Drosophila melanogaster<br>GN=Eno PE=3 SV=1                           | E1JHR5_DR<br>OME (+1) | Eno         | 47 kDa  | 5.13E+07 | 2.64E+08 | 1.64E+08 | 2.33E+08 | 1.19E+08 | 1.75E+08 |
| CG34454 OS=Drosophila melanogaster<br>GN=CG34018 PE=4 SV=1                                  | A8JNG6_DR<br>OME      | CG34018     | 14 kDa  | 6.58E+08 | 9.13E+08 | 4.97E+08 | 4.42E+08 | 4.86E+08 | 2.62E+08 |
| CG31872, isoform A OS=Drosophila<br>melanogaster GN=CG17093 PE=2 SV=2                       | Q9VKT1_DR<br>OME      | CG17093     | 119 kDa | 2.80E+08 | 9.88E+07 | 4.81E+08 | 3.75E+08 | 4.04E+08 | 3.84E+08 |
| V-type proton ATPase subunit E OS=Drosophila<br>melanogaster GN=Vha26 PE=2 SV=1             | VATE_DRO<br>ME        | Vha26       | 26 kDa  | 2.15E+08 | 1.53E+08 | 2.28E+08 | 5.10E+08 | 3.14E+08 | 4.27E+08 |
| Drosomycin-like 5 OS=Drosophila melanogaster<br>GN=Drsl5 PE=2 SV=1                          | Q9VZR2_DR<br>OME      | Drsl5       | 8 kDa   | 2.40E+09 | 4.12E+09 | 2.34E+09 | 1.84E+09 | 1.41E+09 | 1.44E+09 |
| CG10527 OS=Drosophila melanogaster<br>GN=CG10527 PE=4 SV=1                                  | Q9W2M4_D<br>ROME      | CG10527     | 32 kDa  | 2.57E+08 | 5.54E+08 | 5.06E+07 | 5.02E+08 | 3.77E+07 | 3.60E+08 |
| Tequila, isoform G OS=Drosophila melanogaster<br>GN=Tequila PE=4 SV=4                       | Q9VSU2_DR<br>OME      | Tequila     | 309 kDa | 2.35E+08 | 1.93E+08 | 0        | 1.18E+08 | 0        | 1.61E+08 |

|                                                                                                         |                       |                |         |                 |                 |                 |                 |                 |                 |
|---------------------------------------------------------------------------------------------------------|-----------------------|----------------|---------|-----------------|-----------------|-----------------|-----------------|-----------------|-----------------|
| Accessory gland-specific peptide 26Aa<br>OS=Drosophila melanogaster GN=Acp26Aa<br>PE=2 SV=2             | MS2A_DRO<br>ME        | Acp26Aa        | 30 kDa  | 1.05E+09        | 7.99E+07        | 1.29E+09        | 0               | 7.88E+08        | 0               |
| Aconitase, isoform B OS=Drosophila<br>melanogaster GN=Acon PE=2 SV=2                                    | Q9VIE8_DR<br>OME      | Acon           | 85 kDa  | 5.96E+07        | 1.86E+08        | 4.14E+08        | 1.17E+08        | 2.68E+08        | 1.02E+08        |
| CG3513-PA OS=Drosophila melanogaster<br>GN=CG3513 PE=2 SV=1                                             | Q9VQT6_DR<br>OME      | CG3513         | 9 kDa   | 1.83E+09        | 1.75E+09        | 8.48E+08        | 1.07E+08        | 1.29E+08        | 0               |
| Apolipoporphins OS=Drosophila melanogaster<br>GN=Rfabg PE=1 SV=2                                        | APLP_DROM<br>E (+1)   | Rfabg          | 373 kDa | 2.30E+08        | 0               | 3.39E+07        | 3.74E+07        | 2.47E+07        | 1.64E+07        |
| Transitional endoplasmic reticulum ATPase<br>TER94 OS=Drosophila melanogaster GN=TER94<br>PE=1 SV=1     | TERA_DRO<br>ME        | TER94          | 89 kDa  | 1.38E+08        | 5.04E+08        | 4.57E+08        | 4.77E+08        | 3.99E+08        | 2.20E+08        |
| Elongation factor 2 OS=Drosophila melanogaster<br>GN=EF2 PE=1 SV=4                                      | EF2_DROME             | EF2            | 94 kDa  | 2.04E+08        | 2.02E+07        | 1.54E+08        | 8.74E+07        | 9.67E+07        | 3.46E+07        |
| Superoxide dismutase [Cu-Zn] OS=Drosophila<br>melanogaster GN=Sod PE=1 SV=2                             | SODC_DRO<br>ME        | Sod            | 16 kDa  | 5.94E+07        | 2.44E+08        | 1.31E+08        | 2.02E+08        | 1.59E+08        | 2.56E+08        |
| LD45324p OS=Drosophila melanogaster<br>GN=Prx5 PE=2 SV=1                                                | Q960M4_DR<br>OME      | Prx5           | 20 kDa  | 6.67E+07        | 3.83E+08        | 1.29E+08        | 3.13E+08        | 1.64E+08        | 3.24E+08        |
| Heat shock protein 83 OS=Drosophila<br>melanogaster GN=Hsp83 PE=1 SV=1                                  | HSP83_DRO<br>ME (+1)  | Hsp83          | 82 kDa  | 1.55E+08        | 1.58E+08        | 2.12E+08        | 4.08E+07        | 1.26E+08        | 3.10E+07        |
| LD36265p (Fragment) OS=Drosophila<br>melanogaster GN=UGP56e PE=2 SV=1                                   | A5XCL5_DR<br>OME (+1) | UGP            | 58 kDa  | 4.01E+08        | 1.68E+09        | 2.00E+08        | 1.80E+08        | 2.88E+08        | 1.03E+09        |
| Ribosomal protein LP0, isoform B OS=Drosophila<br>melanogaster GN=RpLP0 PE=3 SV=1                       | M9PG76_DR<br>OME (+1) | RpLP0          | 34 kDa  | 4.38E+08        | 3.34E+08        | 4.37E+08        | 1.08E+07        | 4.35E+07        | 0               |
| Odorant-binding protein 56e OS=Drosophila<br>melanogaster GN=Obp56e PE=2 SV=1                           | Q7K088_DR<br>OME      | Obp56e         | 14 kDa  | 1.33E+09        | 1.17E+09        | 4.76E+08        | 1.44E+09        | 3.43E+08        | 1.78E+09        |
| CG9029-PA OS=Drosophila melanogaster<br>GN=CG9029 PE=4 SV=1                                             | Q9VML7_DR<br>OME      | CG9029         | 12 kDa  | 3.96E+08        | 1.31E+08        | 9.96E+08        | 5.82E+07        | 9.42E+08        | 7.61E+07        |
| CG7834, isoform A OS=Drosophila melanogaster<br>GN=CG7834 PE=4 SV=1                                     | Q0KHZ6_DR<br>OME      | CG7834         | 27 kDa  | 1.48E+08        | 2.50E+08        | 3.77E+08        | 2.09E+08        | 3.78E+08        | 2.18E+08        |
| CG18815, isoform D OS=Drosophila<br>melanogaster GN=CG18815-RA PE=2 SV=1                                | C0PDF4_DR<br>OME (+2) | CG18815-<br>RA | 24 kDa  | 1.22E+08        | 1.86E+08        | 2.03E+08        | 8.48E+07        | 6.18E+07        | 1.28E+08        |
| Actin-5C OS=Drosophila melanogaster<br>GN=Act5C PE=1 SV=4                                               | ACT1_DROM<br>E (+1)   | Act5C          | 42 kDa  | 8.96E+08        | 1.35E+09        | 1.23E+09        | 5.45E+08        | 1.05E+09        | 5.18E+08        |
| General odorant-binding protein 99b<br>OS=Drosophila melanogaster GN=Obp99b PE=2<br>SV=1                | OB99B_DRO<br>ME       | Obp99b         | 17 kDa  | 3.03E+07        | 1.34E+08        | 1.26E+07        | 9.89E+07        | 2.06E+07        | 1.00E+08        |
| Glyceraldehyde-3-phosphate dehydrogenase 1<br>OS=Drosophila melanogaster GN=Gapdh1 PE=2<br>SV=2         | G3P1_DROM<br>E        | Gapdh1         | 35 kDa  | 2.62E+09        | 1.90E+09        | 4.52E+09        | 1.16E+09        | 5.10E+09        | 3.53E+08        |
| CG9691, isoform B OS=Drosophila melanogaster<br>GN=CG9691 PE=2 SV=1                                     | Q9W306_DR<br>OME      | CG9691         | 13 kDa  | 9.97E+07        | 4.60E+07        | 1.64E+08        | 2.67E+08        | 1.03E+08        | 2.77E+07        |
| CG15293, isoform A OS=Drosophila<br>melanogaster GN=CG15293 PE=4 SV=1                                   | Q9V3Y7_DR<br>OME      | CG15293        | 37 kDa  | 3.45E+08        | 1.15E+09        | 0               | 2.39E+08        | 1.92E+08        | 3.07E+08        |
| CG16885 OS=Drosophila melanogaster<br>GN=CG16885 PE=2 SV=1                                              | Q8SZM2_DR<br>OME      | CG16885        | 29 kDa  | 1.03E+08        | 1.94E+08        | 9.14E+07        | 6.33E+07        | 4.18E+07        | 4.56E+07        |
| 60 kDa heat shock protein homolog 2,<br>mitochondrial OS=Drosophila melanogaster<br>GN=Hsp60C PE=2 SV=2 | CH60C_DRO<br>ME       | Hsp60C         | 62 kDa  | 0               | 3.69E+07        | 1.39E+08        | 1.09E+08        | 7.56E+07        | 1.10E+07        |
| Ejaculatory bulb-specific protein 3 OS=Drosophila<br>melanogaster GN=PebIII PE=1 SV=2                   | PEB3_DROM<br>E        | PebIII         | 15 kDa  | 6.44E+07        | 1.88E+08        | 2.35E+08        | 1.48E+08        | 2.17E+08        | 4.49E+08        |
| CG8036, isoform D OS=Drosophila melanogaster<br>GN=CG8036 PE=4 SV=1                                     | Q7KSU6_DR<br>OME (+1) | CG8036         | 63 kDa  | 7.85E+08        | 1.41E+08        | 1.96E+09        | 2.38E+08        | 1.55E+09        | 2.24E+08        |
| CG31883 OS=Drosophila melanogaster<br>GN=CG31883 PE=4 SV=1                                              | Q9VLB4_DR<br>OME      | CG31883        | 33 kDa  | 4.15E+08        | 4.32E+08        | 2.73E+08        | 0               | 1.40E+08        | 0               |
| Immune-induced peptides OS=Drosophila<br>melanogaster GN=IM10 PE=1 SV=2                                 | IM10_DROM<br>E        | IM10           | 29 kDa  | 0               | 8.42E+08        | 0               | 1.61E+08        | 0               | 3.17E+08        |
| CG30197 OS=Drosophila melanogaster<br>GN=CG30197 PE=2 SV=1                                              | Q8MKJ5_DR<br>OME      | CG30197        | 12 kDa  | 1.01E+08        | 2.96E+07        | 1.90E+08        | 1.28E+08        | 1.24E+08        | 4597800         |
| LD11278p OS=Drosophila melanogaster<br>GN=Prx2540-1 PE=2 SV=1                                           | A1Z892_DR<br>OME (+1) | Prx2540-1      | 25 kDa  | 1.85E+08        | 3.70E+07        | 1.59E+08        | 2.90E+07        | 9.66E+07        | 0               |
| RT02906p OS=Drosophila melanogaster<br>GN=Sfp79B PE=2 SV=1                                              | B4ZJA5_DR<br>OME      | Sfp79B         | 4 kDa   | 3.71E+09        | 2.08E+09        | 5.36E+09        | 0               | 9.82E+09        | 0               |
| Poly(U)-specific endoribonuclease homolog<br>OS=Drosophila melanogaster GN=CG2145 PE=1<br>SV=1          | ENDOU_DR<br>OME       | CG2145         | 64 kDa  | 7.41E+08        | 1.48E+09        | 5.79E+08        | 5.41E+08        | 5.20E+08        | 7.14E+08        |
| CG7054 OS=Drosophila melanogaster<br>GN=CG7054 PE=1 SV=1                                                | Q9VD02_DR<br>OME      | CG7054         | 20 kDa  | 3.34E+08        | 7.94E+08        | 4.19E+08        | 5.53E+08        | 3.37E+08        | 5.11E+08        |
| CG10576, isoform A OS=Drosophila<br>melanogaster GN=CG10576 PE=4 SV=1                                   | Q9VRP2_DR<br>OME      | CG10576        | 43 kDa  | 1.22E+08        | 4.91E+08        | 6.76E+07        | 1.07E+08        | 2.10E+08        | 8.79E+07        |
| 60S acidic ribosomal protein P2 OS=Drosophila<br>melanogaster GN=RpLP2 PE=1 SV=1                        | RLA2_DROM<br>E        | RpLP2          | 12 kDa  | 1.96E+08        | 1.85E+08        | 1.07E+08        | 0               | 2.85E+07        | 2.86E+07        |
| Deoxyuridine triphosphatase, isoform B<br>OS=Drosophila melanogaster GN=dUTPase<br>PE=2 SV=1            | Q8IPB1_DR<br>OME (+1) | dUTPase        | 18 kDa  | 1.63E+08        | 8.92E+07        | 1.23E+08        | 1.22E+08        | 1.52E+08        | 5.56E+07        |
| <b>Total Precursor Intensity of Top 3 Peptides</b>                                                      |                       |                |         | <b>3.66E+11</b> | <b>4.01E+11</b> | <b>3.34E+11</b> | <b>2.96E+11</b> | <b>2.98E+11</b> | <b>2.97E+11</b> |

# Supplementary Figure 1

Uncropped scans of gel images for the dot blot assay

Extended Data Figure 7e

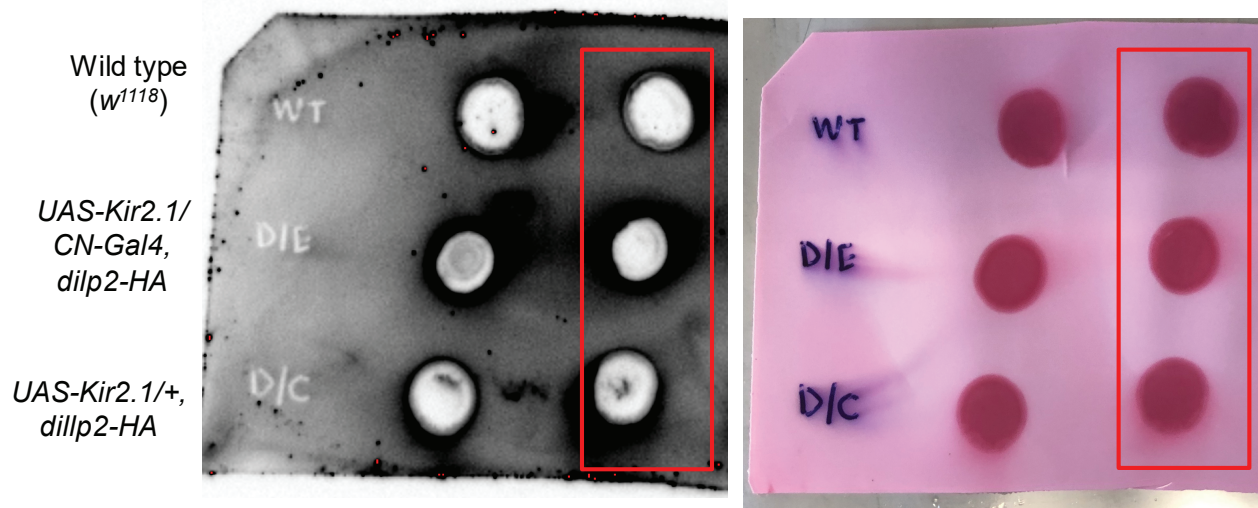

Extended Data Figure 7g

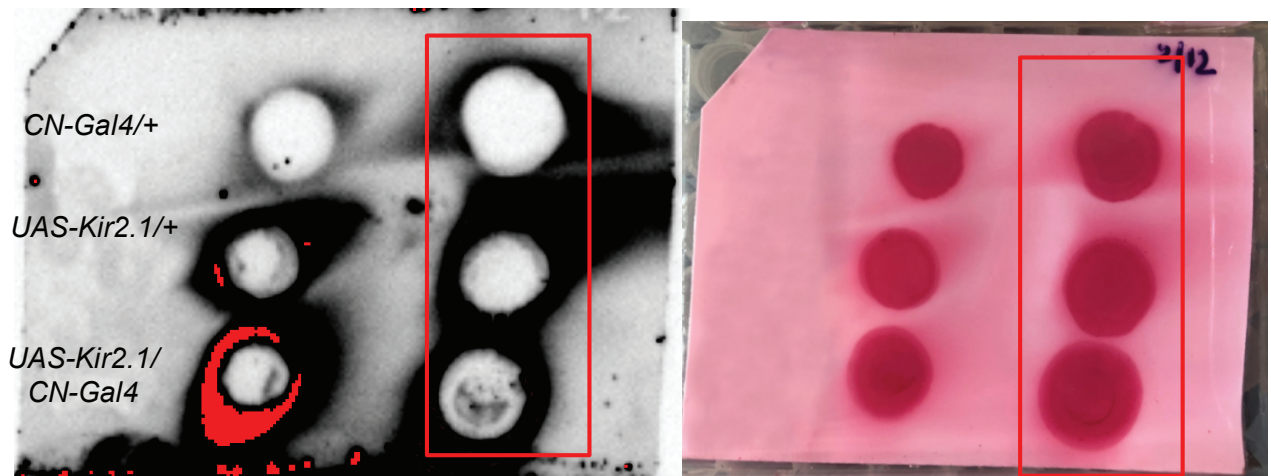

Supplement: NIHMS1540173-supplement-1.pdf [file NIHMS1540173-supplement-1.pdf]
